# Supplementary material
Source: publisher figshare collection journal article supplement (https://acs.figshare.com/ndownloader/files/4107298)
Supplement: Supplementary file 1 [file 4107298]

data_global                        
 
 #1. SUBMISSION DETAILS
 _publ_contact_author_name     'Sonny C. Lee'                    
 _publ_contact_author_address
;                                                                               
 Department of Chemistry
 University of Waterloo
 200 University Avenue West
 Waterloo, Ontario  N2L 3G1
 CANADA  
;
 _publ_contact_author_email   'sclee@uwaterloo.ca'
 _publ_contact_author_fax     '519-746-0435'
 _publ_contact_author_phone   '519-885-1211 x37501'
 _publ_requested_journal      'Inorg. Chem.'
 
 #2. TITLE AND AUTHOR LIST
 
 _publ_section_title               
;
 Iron-Amide-Sulfide and Iron-Imide-Sulfide Clusters: 
 Heteroligated Core Environments Relevant to the Nitrogenase FeMo Cofactor
;
loop_
 _publ_author_name
 _publ_author_address
 'Chen, Xu-Dong'
;
 Department of Chemistry and Chemical Biology
 Harvard University
 12 Oxford Street
 Cambridge, MA  02138
 USA 
; 
 'Zhang, Wei'
;
 Department of Chemistry
 University of Waterloo
 200 University Avenue West
 Waterloo, Ontario  N2L 3G1
 CANADA  
; 
 'Duncan, Jeremiah S.'
;
 Department of Atmospheric Science & Chemistry
 17 High St., MSC 48
 Plymouth State University
 Plymouth, NH 03264
 USA
; 
 'Lee, Sonny C.'
;
 Department of Chemistry
 University of Waterloo
 200 University Avenue West
 Waterloo, Ontario  N2L 3G1
 CANADA  
; 
 
 #3.  Results
 

 data_550_14
  
 _audit_creation_method            SHELXL
 _chemical_name_systematic  
;
?
;
  _chemical_name_common            
;
 '(NEt4)2[Fe2(mu-NtBu)(mu-S)Cl2]'
;
 _chemical_formula_moiety          
  '(C8H20N +)2 (Fe 3+)2 (C4H9N 2-) (S 2-) (Cl -)4'
 _chemical_formula_structural      '(NC8H20)2(Fe2(NC4H9)SCl4)'
 _chemical_formula_analytical      ?
 _chemical_formula_sum             'C20 H49 Cl4 Fe2 N3 S'
 _chemical_formula_weight          617.18
 _chemical_melting_point           ?
 _chemical_compound_source         'Chemical synthesis, S.C. Lee lab'
  
 loop_
  _atom_type_symbol
  _atom_type_description
  _atom_type_scat_dispersion_real
  _atom_type_scat_dispersion_imag
  _atom_type_scat_source
  'C'  'C'   0.0033   0.0016
  'International Tables Vol C Tables 4.2.6.8 and 6.1.1.4'
  'H'  'H'   0.0000   0.0000
  'International Tables Vol C Tables 4.2.6.8 and 6.1.1.4'
  'N'  'N'   0.0061   0.0033
  'International Tables Vol C Tables 4.2.6.8 and 6.1.1.4'
  'S'  'S'   0.1246   0.1234
  'International Tables Vol C Tables 4.2.6.8 and 6.1.1.4'
  'Cl'  'Cl'   0.1484   0.1585
  'International Tables Vol C Tables 4.2.6.8 and 6.1.1.4'
  'Fe'  'Fe'   0.3463   0.8444
  'International Tables Vol C Tables 4.2.6.8 and 6.1.1.4'
  
 _symmetry_cell_setting            monoclinic
 _symmetry_space_group_name_H-M    'P 1 21/n 1'
  
 loop_
  _symmetry_equiv_pos_as_xyz
  'x, y, z'
  '-x+1/2, y+1/2, -z+1/2'
  '-x, -y, -z'
  'x-1/2, -y-1/2, z-1/2'
  
 _cell_length_a                    9.3855(3)
 _cell_length_b                    15.6669(8)
 _cell_length_c                    20.7398(11)
 _cell_angle_alpha                 90.00
 _cell_angle_beta                  95.827(3)
 _cell_angle_gamma                 90.00
 _cell_volume                      3033.9(2)
 _cell_formula_units_Z             4
 _cell_measurement_temperature     200(2)
 _cell_measurement_reflns_used     18845
 _cell_measurement_theta_min       1.63
 _cell_measurement_theta_max       26.00
  
 _exptl_crystal_description        parallelepiped
 _exptl_crystal_colour             orange-black
 _exptl_crystal_size_max           0.33
 _exptl_crystal_size_mid           0.15
 _exptl_crystal_size_min           0.10
 _exptl_crystal_density_meas       ?
 _exptl_crystal_density_diffrn     1.351
 _exptl_crystal_density_method     'not measured'
 _exptl_crystal_F_000              1304
 _exptl_absorpt_coefficient_mu     1.390
 _exptl_absorpt_correction_type    none
 _exptl_absorpt_correction_T_min   ?
 _exptl_absorpt_correction_T_max   ?
  
 _exptl_special_details             ?
  
 _diffrn_ambient_temperature       200(2)
 _diffrn_radiation_wavelength      0.71073
 _diffrn_radiation_type            MoK\a
 _diffrn_radiation_source          'fine-focus sealed tube'
 _diffrn_radiation_monochromator   graphite
 _diffrn_measurement_device        'Nonius KappaCCD'
 _diffrn_measurement_method        '\w scans'
 _diffrn_standards_number          0
 _diffrn_standards_interval_count  ?
 _diffrn_standards_interval_time   ?
 _diffrn_standards_decay_%         ?
 _diffrn_reflns_number             18845
 _diffrn_reflns_av_R_equivalents   0.060
 _diffrn_reflns_av_sigmaI/netI     0.0685
 _diffrn_reflns_limit_h_min        0
 _diffrn_reflns_limit_h_max        11
 _diffrn_reflns_limit_k_min        0
 _diffrn_reflns_limit_k_max        19
 _diffrn_reflns_limit_l_min        -25
 _diffrn_reflns_limit_l_max        25
 _diffrn_reflns_theta_min          1.63
 _diffrn_reflns_theta_max          26.00
 _reflns_number_total              5955
 _reflns_number_observed           3742
 _reflns_observed_criterion        'I>2\s(I)'
  
 _computing_data_collection        'NONIUS COLLECT'
 _computing_cell_refinement        'DENZO-SMN'
 _computing_data_reduction         'DENZO-SMN'
 _computing_structure_solution     'Siemens SHELXTL'
 _computing_structure_refinement   'Siemens SHELXTL'
 _computing_molecular_graphics     'Siemens SHELXTL'
 _computing_publication_material   'CIFTAB, Siemens SHELXTL'
  
 _refine_special_details
;
  Refinement on F^2^ for ALL reflections except for 1 with very negative F^2^
  or flagged by the user for potential systematic errors.  Weighted R-factors
  wR and all goodnesses of fit S are based on F^2^, conventional R-factors R
  are based on F, with F set to zero for negative F^2^. The observed criterion
  of F^2^ > 2sigma(F^2^) is used only for calculating _R_factor_obs etc. and is
  not relevant to the choice of reflections for refinement.  R-factors based
  on F^2^ are statistically about twice as large as those based on F, and R-
  factors based on ALL data will be even larger.
;
  
 _refine_ls_structure_factor_coef  Fsqd
 _refine_ls_matrix_type            full
 _refine_ls_weighting_scheme       calc
 _refine_ls_weighting_details
  'w=1/[\s^2^(Fo^2^)+(0.0871P)^2^+1.2100P] where P=(Fo^2^+2Fc^2^)/3'
 _atom_sites_solution_primary      direct
 _atom_sites_solution_secondary    difmap
 _atom_sites_solution_hydrogens    geom
 _refine_ls_hydrogen_treatment     mixed
 _refine_ls_extinction_method      none
 _refine_ls_extinction_coef        ?
 _refine_ls_number_reflns          5954
 _refine_ls_number_parameters      282
 _refine_ls_number_restraints      0
 _refine_ls_R_factor_all           0.1004
 _refine_ls_R_factor_obs           0.0534
 _refine_ls_wR_factor_all          0.1618
 _refine_ls_wR_factor_obs          0.1331
 _refine_ls_goodness_of_fit_all    1.031
 _refine_ls_goodness_of_fit_obs    1.082
 _refine_ls_restrained_S_all       1.032
 _refine_ls_restrained_S_obs       1.082
 _refine_ls_shift/esd_max          0.000
 _refine_ls_shift/esd_mean         0.000
  
 loop_
  _atom_site_label
  _atom_site_type_symbol
  _atom_site_fract_x
  _atom_site_fract_y
  _atom_site_fract_z
  _atom_site_U_iso_or_equiv
  _atom_site_thermal_displace_type
  _atom_site_occupancy
  _atom_site_calc_flag
  _atom_site_refinement_flags
  _atom_site_disorder_group
 Fe1 Fe 0.74013(6) -0.15090(4) -0.18559(3) 0.0336(2) Uani 1 d . .
 Fe2 Fe 0.60014(6) -0.22945(4) -0.10367(3) 0.0333(2) Uani 1 d . .
 Cl1 Cl 0.94707(11) -0.08212(8) -0.14745(6) 0.0446(3) Uani 1 d . .
 Cl2 Cl 0.72207(14) -0.14395(9) -0.29567(6) 0.0523(4) Uani 1 d . .
 Cl3 Cl 0.69389(13) -0.23145(9) 0.00188(6) 0.0494(3) Uani 1 d . .
 Cl4 Cl 0.40948(11) -0.31894(8) -0.10760(6) 0.0466(3) Uani 1 d . .
 S1 S 0.55463(11) -0.09709(8) -0.13912(6) 0.0390(3) Uani 1 d . .
 N1 N 0.7389(3) -0.2616(2) -0.1553(2) 0.0326(9) Uani 1 d . .
 N2 N 0.7906(3) 0.1498(2) -0.0407(2) 0.0327(9) Uani 1 d . .
 N3 N 0.7147(4) 0.5779(2) 0.1688(2) 0.0360(9) Uani 1 d . .
 C1 C 0.7889(5) -0.3440(3) -0.1763(2) 0.0374(11) Uani 1 d . .
 C2 C 0.8053(5) -0.4047(3) -0.1186(3) 0.0491(13) Uani 1 d . .
 H2A H 0.8277(35) -0.4620(5) -0.1335(3) 0.074 Uiso 1 calc R .
 H2B H 0.7157(13) -0.4063(16) -0.0982(10) 0.074 Uiso 1 calc R .
 H2C H 0.8830(24) -0.3847(12) -0.0871(8) 0.074 Uiso 1 calc R .
 C3 C 0.9322(5) -0.3336(4) -0.2047(3) 0.0517(14) Uani 1 d . .
 H3A H 0.9620(19) -0.3887(6) -0.2212(16) 0.078 Uiso 1 calc R .
 H3B H 1.0049(10) -0.3134(22) -0.1708(5) 0.078 Uiso 1 calc R .
 H3C H 0.9216(11) -0.2920(17) -0.2401(12) 0.078 Uiso 1 calc R .
 C4 C 0.6763(5) -0.3785(3) -0.2286(3) 0.0478(13) Uani 1 d . .
 H4A H 0.7082(17) -0.4336(11) -0.2443(12) 0.072 Uiso 1 calc R .
 H4B H 0.6636(26) -0.3380(10) -0.2647(7) 0.072 Uiso 1 calc R .
 H4C H 0.5850(11) -0.3860(20) -0.2101(5) 0.072 Uiso 1 calc R .
 C5 C 0.7809(5) 0.2461(3) -0.0389(3) 0.0484(14) Uani 1 d . .
 H5A H 0.6826(5) 0.2622(3) -0.0303(3) 0.058 Uiso 1 calc R .
 H5B H 0.7967(5) 0.2686(3) -0.0822(3) 0.058 Uiso 1 calc R .
 C6 C 0.8867(6) 0.2890(4) 0.0114(3) 0.060(2) Uani 1 d . .
 H6A H 0.8703(28) 0.3507(4) 0.0106(13) 0.090 Uiso 1 calc R .
 H6B H 0.9847(6) 0.2771(21) 0.0015(11) 0.090 Uiso 1 calc R .
 H6C H 0.8733(28) 0.2666(18) 0.0545(4) 0.090 Uiso 1 calc R .
 C7 C 0.9442(4) 0.1199(3) -0.0436(2) 0.0389(12) Uani 1 d . .
 H7A H 1.0021(4) 0.1383(3) -0.0035(2) 0.047 Uiso 1 calc R .
 H7B H 0.9450(4) 0.0567(3) -0.0444(2) 0.047 Uiso 1 calc R .
 C8 C 1.0153(5) 0.1522(4) -0.1012(2) 0.0453(13) Uani 1 d . .
 H8A H 0.9670(23) 0.1279(17) -0.1412(3) 0.068 Uiso 1 calc R .
 H8B H 1.1163(10) 0.1351(18) -0.0968(8) 0.068 Uiso 1 calc R .
 H8C H 1.0088(31) 0.2146(4) -0.1031(9) 0.068 Uiso 1 calc R .
 C9 C 0.7353(5) 0.1140(3) 0.0201(2) 0.0441(12) Uani 1 d . .
 H9A H 0.8003(5) 0.1330(3) 0.0580(2) 0.053 Uiso 1 calc R .
 H9B H 0.6401(5) 0.1394(3) 0.0243(2) 0.053 Uiso 1 calc R .
 C10 C 0.7214(5) 0.0190(3) 0.0235(3) 0.0526(14) Uani 1 d . .
 H10A H 0.6860(36) 0.0031(4) 0.0647(7) 0.079 Uiso 1 calc R .
 H10B H 0.8152(9) -0.0074(4) 0.0206(18) 0.079 Uiso 1 calc R .
 H10C H 0.6540(29) -0.0009(4) -0.0125(10) 0.079 Uiso 1 calc R .
 C11 C 0.7016(4) 0.1179(3) -0.1010(2) 0.0404(12) Uani 1 d . .
 H11A H 0.7399(4) 0.1434(3) -0.1394(2) 0.049 Uiso 1 calc R .
 H11B H 0.7140(4) 0.0553(3) -0.1037(2) 0.049 Uiso 1 calc R .
 C12 C 0.5430(5) 0.1371(4) -0.1046(3) 0.0490(14) Uani 1 d . .
 H12A H 0.4942(7) 0.1113(19) -0.1439(9) 0.074 Uiso 1 calc R .
 H12B H 0.5283(5) 0.1990(4) -0.1059(17) 0.074 Uiso 1 calc R .
 H12C H 0.5037(9) 0.1134(20) -0.0664(9) 0.074 Uiso 1 calc R .
 C13 C 0.8108(6) 0.5220(4) 0.1321(3) 0.0568(15) Uani 1 d . .
 H13A H 0.8865(6) 0.4977(4) 0.1635(3) 0.068 Uiso 1 calc R .
 H13B H 0.7531(6) 0.4738(4) 0.1127(3) 0.068 Uiso 1 calc R .
 C14 C 0.8813(7) 0.5659(4) 0.0792(3) 0.073(2) Uani 1 d . .
 H14A H 0.9406(38) 0.5248(7) 0.0584(14) 0.110 Uiso 1 calc R .
 H14B H 0.9417(36) 0.6126(18) 0.0979(4) 0.110 Uiso 1 calc R .
 H14C H 0.8077(7) 0.5889(25) 0.0470(11) 0.110 Uiso 1 calc R .
 C15 C 0.6021(5) 0.6232(4) 0.1231(3) 0.0536(14) Uani 1 d . .
 H15A H 0.5362(5) 0.6535(4) 0.1497(3) 0.064 Uiso 1 calc R .
 H15B H 0.6511(5) 0.6671(4) 0.0990(3) 0.064 Uiso 1 calc R .
 C16 C 0.5155(6) 0.5700(4) 0.0756(3) 0.072(2) Uani 1 d . .
 H16A H 0.4591(36) 0.6068(4) 0.0445(13) 0.108 Uiso 1 calc R .
 H16B H 0.4509(34) 0.5341(20) 0.0981(4) 0.108 Uiso 1 calc R .
 H16C H 0.5787(7) 0.5337(21) 0.0526(15) 0.108 Uiso 1 calc R .
 C17 C 0.8070(6) 0.6443(4) 0.2066(3) 0.0572(15) Uani 1 d . .
 H17A H 0.8824(6) 0.6143(4) 0.2348(3) 0.069 Uiso 1 calc R .
 H17B H 0.8554(6) 0.6790(4) 0.1754(3) 0.069 Uiso 1 calc R .
 C18 C 0.7313(7) 0.7022(5) 0.2470(3) 0.080(2) Uani 1 d . .
 H18A H 0.8002(10) 0.7409(20) 0.2705(17) 0.120 Uiso 1 calc R .
 H18B H 0.6822(40) 0.6689(5) 0.2781(15) 0.120 Uiso 1 calc R .
 H18C H 0.6608(34) 0.7355(21) 0.2194(4) 0.120 Uiso 1 calc R .
 C19 C 0.6365(5) 0.5207(3) 0.2125(3) 0.0486(13) Uani 1 d . .
 H19A H 0.5667(5) 0.5559(3) 0.2335(3) 0.058 Uiso 1 calc R .
 H19B H 0.5816(5) 0.4778(3) 0.1852(3) 0.058 Uiso 1 calc R .
 C20 C 0.7294(5) 0.4747(4) 0.2645(3) 0.0553(15) Uani 1 d . .
 H20A H 0.7965(27) 0.4375(18) 0.2445(3) 0.083 Uiso 1 calc R .
 H20B H 0.6692(6) 0.4401(19) 0.2903(12) 0.083 Uiso 1 calc R .
 H20C H 0.7831(30) 0.5164(4) 0.2926(11) 0.083 Uiso 1 calc R .
  
 loop_
  _atom_site_aniso_label
  _atom_site_aniso_U_11
  _atom_site_aniso_U_22
  _atom_site_aniso_U_33
  _atom_site_aniso_U_23
  _atom_site_aniso_U_13
  _atom_site_aniso_U_12
 Fe1 0.0363(3) 0.0328(4) 0.0319(4) 0.0009(3) 0.0044(3) -0.0020(3)
 Fe2 0.0349(3) 0.0328(4) 0.0332(4) -0.0008(3) 0.0076(3) -0.0003(3)
 Cl1 0.0381(6) 0.0481(8) 0.0475(8) -0.0032(6) 0.0041(5) -0.0086(5)
 Cl2 0.0708(8) 0.0551(9) 0.0308(7) 0.0036(6) 0.0032(6) -0.0072(7)
 Cl3 0.0616(7) 0.0544(9) 0.0324(7) 0.0019(6) 0.0052(5) 0.0002(6)
 Cl4 0.0420(6) 0.0423(8) 0.0572(9) -0.0031(6) 0.0135(5) -0.0077(5)
 S1 0.0370(6) 0.0334(7) 0.0467(8) -0.0019(6) 0.0043(5) 0.0045(5)
 N1 0.035(2) 0.032(2) 0.032(2) 0.000(2) 0.009(2) -0.003(2)
 N2 0.035(2) 0.034(2) 0.031(2) 0.001(2) 0.0079(15) 0.003(2)
 N3 0.036(2) 0.033(2) 0.039(2) 0.003(2) 0.003(2) -0.001(2)
 C1 0.045(2) 0.033(3) 0.036(3) -0.002(2) 0.011(2) 0.003(2)
 C2 0.058(3) 0.034(3) 0.055(4) 0.000(3) 0.006(2) 0.008(2)
 C3 0.044(3) 0.057(4) 0.056(4) -0.001(3) 0.016(2) 0.012(2)
 C4 0.057(3) 0.043(3) 0.044(3) -0.011(3) 0.005(2) -0.006(2)
 C5 0.049(3) 0.035(3) 0.062(4) 0.000(3) 0.012(2) 0.001(2)
 C6 0.068(3) 0.042(4) 0.074(4) -0.015(3) 0.024(3) -0.013(3)
 C7 0.034(2) 0.038(3) 0.044(3) -0.004(2) 0.004(2) 0.008(2)
 C8 0.037(2) 0.058(4) 0.042(3) 0.001(3) 0.010(2) 0.004(2)
 C9 0.048(3) 0.050(3) 0.034(3) 0.002(3) 0.003(2) -0.003(2)
 C10 0.051(3) 0.049(4) 0.060(4) 0.013(3) 0.014(2) 0.004(2)
 C11 0.041(2) 0.049(3) 0.031(3) -0.004(2) 0.004(2) -0.004(2)
 C12 0.037(2) 0.055(4) 0.054(4) 0.002(3) -0.003(2) 0.004(2)
 C13 0.059(3) 0.062(4) 0.051(4) 0.003(3) 0.013(3) 0.007(3)
 C14 0.084(4) 0.081(5) 0.059(4) 0.017(4) 0.032(3) 0.028(4)
 C15 0.052(3) 0.050(4) 0.058(4) 0.003(3) 0.002(3) 0.007(3)
 C16 0.071(4) 0.071(5) 0.066(4) 0.009(4) -0.031(3) -0.012(3)
 C17 0.057(3) 0.056(4) 0.058(4) -0.005(3) 0.001(3) -0.010(3)
 C18 0.096(5) 0.072(5) 0.069(5) -0.017(4) -0.003(4) 0.010(4)
 C19 0.051(3) 0.047(3) 0.049(3) 0.002(3) 0.010(2) -0.001(2)
 C20 0.054(3) 0.058(4) 0.054(4) 0.019(3) 0.005(3) -0.001(3)
  
 _geom_special_details
;
  All esds (except the esd in the dihedral angle between two l.s. planes)
  are estimated using the full covariance matrix.  The cell esds are taken
  into account individually in the estimation of esds in distances, angles
  and torsion angles; correlations between esds in cell parameters are only
  used when they are defined by crystal symmetry.  An approximate (isotropic)
  treatment of cell esds is used for estimating esds involving l.s. planes.
;
  
 loop_
  _geom_bond_atom_site_label_1
  _geom_bond_atom_site_label_2
  _geom_bond_distance
  _geom_bond_site_symmetry_2
  _geom_bond_publ_flag
 Fe1 N1 1.845(4) . ?
 Fe1 S1 2.2385(13) . ?
 Fe1 Cl2 2.2748(15) . ?
 Fe1 Cl1 2.2907(12) . ?
 Fe1 Fe2 2.5653(9) . ?
 Fe2 N1 1.838(3) . ?
 Fe2 S1 2.2270(14) . ?
 Fe2 Cl4 2.2682(13) . ?
 Fe2 Cl3 2.2751(14) . ?
 N1 C1 1.455(6) . ?
 N2 C5 1.512(6) . ?
 N2 C11 1.517(6) . ?
 N2 C9 1.518(6) . ?
 N2 C7 1.523(5) . ?
 N3 C19 1.516(6) . ?
 N3 C13 1.517(6) . ?
 N3 C17 1.519(6) . ?
 N3 C15 1.522(6) . ?
 C1 C2 1.523(7) . ?
 C1 C3 1.531(6) . ?
 C1 C4 1.534(7) . ?
 C5 C6 1.522(7) . ?
 C7 C8 1.514(7) . ?
 C9 C10 1.496(7) . ?
 C11 C12 1.513(6) . ?
 C13 C14 1.504(7) . ?
 C15 C16 1.471(7) . ?
 C17 C18 1.467(8) . ?
 C19 C20 1.500(7) . ?
  
 loop_
  _geom_angle_atom_site_label_1
  _geom_angle_atom_site_label_2
  _geom_angle_atom_site_label_3
  _geom_angle
  _geom_angle_site_symmetry_1
  _geom_angle_site_symmetry_3
  _geom_angle_publ_flag
 N1 Fe1 S1 100.10(11) . . ?
 N1 Fe1 Cl2 112.59(12) . . ?
 S1 Fe1 Cl2 115.60(5) . . ?
 N1 Fe1 Cl1 111.05(11) . . ?
 S1 Fe1 Cl1 110.09(5) . . ?
 Cl2 Fe1 Cl1 107.35(5) . . ?
 N1 Fe1 Fe2 45.75(11) . . ?
 S1 Fe1 Fe2 54.73(4) . . ?
 Cl2 Fe1 Fe2 134.16(5) . . ?
 Cl1 Fe1 Fe2 118.05(4) . . ?
 N1 Fe2 S1 100.74(12) . . ?
 N1 Fe2 Cl4 114.36(12) . . ?
 S1 Fe2 Cl4 116.07(5) . . ?
 N1 Fe2 Cl3 109.22(12) . . ?
 S1 Fe2 Cl3 111.90(5) . . ?
 Cl4 Fe2 Cl3 104.64(5) . . ?
 N1 Fe2 Fe1 45.97(12) . . ?
 S1 Fe2 Fe1 55.15(4) . . ?
 Cl4 Fe2 Fe1 136.72(5) . . ?
 Cl3 Fe2 Fe1 118.02(4) . . ?
 Fe2 S1 Fe1 70.12(4) . . ?
 C1 N1 Fe2 133.4(3) . . ?
 C1 N1 Fe1 135.9(3) . . ?
 Fe2 N1 Fe1 88.3(2) . . ?
 C5 N2 C11 108.6(4) . . ?
 C5 N2 C9 108.8(4) . . ?
 C11 N2 C9 110.9(3) . . ?
 C5 N2 C7 111.5(3) . . ?
 C11 N2 C7 108.0(3) . . ?
 C9 N2 C7 108.9(3) . . ?
 C19 N3 C13 107.9(4) . . ?
 C19 N3 C17 112.5(4) . . ?
 C13 N3 C17 108.5(4) . . ?
 C19 N3 C15 107.5(4) . . ?
 C13 N3 C15 111.5(4) . . ?
 C17 N3 C15 109.0(4) . . ?
 N1 C1 C2 109.2(4) . . ?
 N1 C1 C3 110.1(4) . . ?
 C2 C1 C3 110.2(4) . . ?
 N1 C1 C4 107.7(4) . . ?
 C2 C1 C4 110.0(4) . . ?
 C3 C1 C4 109.6(4) . . ?
 N2 C5 C6 114.8(4) . . ?
 C8 C7 N2 115.1(4) . . ?
 C10 C9 N2 116.5(4) . . ?
 C12 C11 N2 115.6(4) . . ?
 C14 C13 N3 115.5(5) . . ?
 C16 C15 N3 117.1(5) . . ?
 C18 C17 N3 115.7(5) . . ?
 C20 C19 N3 115.6(4) . . ?
  
 loop_
  _geom_torsion_atom_site_label_1
  _geom_torsion_atom_site_label_2
  _geom_torsion_atom_site_label_3
  _geom_torsion_atom_site_label_4
  _geom_torsion
  _geom_torsion_site_symmetry_1
  _geom_torsion_site_symmetry_2
  _geom_torsion_site_symmetry_3
  _geom_torsion_site_symmetry_4
  _geom_torsion_publ_flag
  N1 Fe1 Fe2 N1 0.0 . . . . ?
  S1 Fe1 Fe2 N1 171.5(2) . . . . ?
  Cl2 Fe1 Fe2 N1 78.6(2) . . . . ?
  Cl1 Fe1 Fe2 N1 -92.8(2) . . . . ?
  N1 Fe1 Fe2 S1 -171.5(2) . . . . ?
  S1 Fe1 Fe2 S1 0.0 . . . . ?
  Cl2 Fe1 Fe2 S1 -92.91(7) . . . . ?
  Cl1 Fe1 Fe2 S1 95.72(6) . . . . ?
  N1 Fe1 Fe2 Cl4 -79.1(2) . . . . ?
  S1 Fe1 Fe2 Cl4 92.39(8) . . . . ?
  Cl2 Fe1 Fe2 Cl4 -0.52(10) . . . . ?
  Cl1 Fe1 Fe2 Cl4 -171.88(7) . . . . ?
  N1 Fe1 Fe2 Cl3 90.2(2) . . . . ?
  S1 Fe1 Fe2 Cl3 -98.29(6) . . . . ?
  Cl2 Fe1 Fe2 Cl3 168.79(7) . . . . ?
  Cl1 Fe1 Fe2 Cl3 -2.57(7) . . . . ?
  N1 Fe2 S1 Fe1 -6.23(12) . . . . ?
  Cl4 Fe2 S1 Fe1 -130.30(5) . . . . ?
  Cl3 Fe2 S1 Fe1 109.70(5) . . . . ?
  Fe1 Fe2 S1 Fe1 0.0 . . . . ?
  N1 Fe1 S1 Fe2 6.20(12) . . . . ?
  Cl2 Fe1 S1 Fe2 127.40(6) . . . . ?
  Cl1 Fe1 S1 Fe2 -110.77(5) . . . . ?
  Fe2 Fe1 S1 Fe2 0.0 . . . . ?
  S1 Fe2 N1 C1 -156.7(4) . . . . ?
  Cl4 Fe2 N1 C1 -31.5(4) . . . . ?
  Cl3 Fe2 N1 C1 85.4(4) . . . . ?
  Fe1 Fe2 N1 C1 -163.8(5) . . . . ?
  S1 Fe2 N1 Fe1 7.12(13) . . . . ?
  Cl4 Fe2 N1 Fe1 132.35(10) . . . . ?
  Cl3 Fe2 N1 Fe1 -110.79(11) . . . . ?
  Fe1 Fe2 N1 Fe1 0.0 . . . . ?
  S1 Fe1 N1 C1 156.0(4) . . . . ?
  Cl2 Fe1 N1 C1 32.7(4) . . . . ?
  Cl1 Fe1 N1 C1 -87.7(4) . . . . ?
  Fe2 Fe1 N1 C1 163.1(5) . . . . ?
  S1 Fe1 N1 Fe2 -7.07(13) . . . . ?
  Cl2 Fe1 N1 Fe2 -130.40(10) . . . . ?
  Cl1 Fe1 N1 Fe2 109.19(10) . . . . ?
  Fe2 Fe1 N1 Fe2 0.0 . . . . ?
  Fe2 N1 C1 C2 -44.3(5) . . . . ?
  Fe1 N1 C1 C2 159.2(3) . . . . ?
  Fe2 N1 C1 C3 -165.5(3) . . . . ?
  Fe1 N1 C1 C3 38.1(6) . . . . ?
  Fe2 N1 C1 C4 75.1(5) . . . . ?
  Fe1 N1 C1 C4 -81.3(5) . . . . ?
  C11 N2 C5 C6 -168.7(4) . . . . ?
  C9 N2 C5 C6 70.4(5) . . . . ?
  C7 N2 C5 C6 -49.8(6) . . . . ?
  C5 N2 C7 C8 -58.6(6) . . . . ?
  C11 N2 C7 C8 60.7(5) . . . . ?
  C9 N2 C7 C8 -178.8(4) . . . . ?
  C5 N2 C9 C10 173.5(4) . . . . ?
  C11 N2 C9 C10 54.0(5) . . . . ?
  C7 N2 C9 C10 -64.7(5) . . . . ?
  C5 N2 C11 C12 -62.4(5) . . . . ?
  C9 N2 C11 C12 57.2(6) . . . . ?
  C7 N2 C11 C12 176.5(4) . . . . ?
  C19 N3 C13 C14 171.6(5) . . . . ?
  C17 N3 C13 C14 -66.3(6) . . . . ?
  C15 N3 C13 C14 53.8(6) . . . . ?
  C19 N3 C15 C16 -66.4(6) . . . . ?
  C13 N3 C15 C16 51.7(6) . . . . ?
  C17 N3 C15 C16 171.4(5) . . . . ?
  C19 N3 C17 C18 -58.6(6) . . . . ?
  C13 N3 C17 C18 -177.9(5) . . . . ?
  C15 N3 C17 C18 60.5(6) . . . . ?
  C13 N3 C19 C20 63.6(6) . . . . ?
  C17 N3 C19 C20 -56.0(6) . . . . ?
  C15 N3 C19 C20 -176.0(5) . . . . ?
  
 _diffrn_measured_fraction_theta_max    0.998 
 _diffrn_reflns_theta_full              26.00 
 _diffrn_measured_fraction_theta_full   0.998 
 _refine_diff_density_max    0.865
 _refine_diff_density_min   -0.382
 _refine_diff_density_rms    0.099
 


 #===END
 

data_574_14 
 
_audit_creation_method            SHELXL 
_chemical_name_systematic 
; 
 ? 
; 
_chemical_name_common             'Fe2(mu-NHtBu)[N(TMS)2]2' 
_chemical_formula_moiety          '(Fe 2+)2 (C4H10N -)2 (C6H18NSi2 1-)2'
_chemical_formula_structural      'Fe2(NC4H10)2(NSi2C6H18)2'
_chemical_formula_analytical      ? 
_chemical_formula_sum             'C20 H56 Fe2 N4 Si4' 
_chemical_formula_weight          576.75 
_chemical_melting_point           ? 
_chemical_compound_source         'Chemical synthesis, S.C. Lee lab'
 
loop_ 
 _atom_type_symbol 
 _atom_type_description 
 _atom_type_scat_dispersion_real 
 _atom_type_scat_dispersion_imag 
 _atom_type_scat_source 
 'C'  'C'   0.0033   0.0016 
 'International Tables Vol C Tables 4.2.6.8 and 6.1.1.4' 
 'H'  'H'   0.0000   0.0000 
 'International Tables Vol C Tables 4.2.6.8 and 6.1.1.4' 
 'N'  'N'   0.0061   0.0033 
 'International Tables Vol C Tables 4.2.6.8 and 6.1.1.4' 
 'Si'  'Si'   0.0817   0.0704 
 'International Tables Vol C Tables 4.2.6.8 and 6.1.1.4' 
 'Fe'  'Fe'   0.3463   0.8444 
 'International Tables Vol C Tables 4.2.6.8 and 6.1.1.4' 
 
_symmetry_cell_setting            monoclinic
_symmetry_space_group_name_H-M    'P 1 21/c 1'
 
loop_ 
 _symmetry_equiv_pos_as_xyz 
 'x, y, z' 
 '-x, y+1/2, -z+1/2' 
 '-x, -y, -z' 
 'x, -y-1/2, z-1/2' 
 
_cell_length_a                    11.7818(7) 
_cell_length_b                    9.5043(6) 
_cell_length_c                    15.9211(8) 
_cell_angle_alpha                 90.00 
_cell_angle_beta                  102.368(3) 
_cell_angle_gamma                 90.00 
_cell_volume                      1741.4(2) 
_cell_formula_units_Z             2 
_cell_measurement_temperature     200(2) 
_cell_measurement_reflns_used     6729
_cell_measurement_theta_min       1.77
_cell_measurement_theta_max       23.97
 
_exptl_crystal_description        rods
_exptl_crystal_colour             green
_exptl_crystal_size_max           0.35 
_exptl_crystal_size_mid           0.33 
_exptl_crystal_size_min           0.23 
_exptl_crystal_density_meas       ? 
_exptl_crystal_density_diffrn     1.100 
_exptl_crystal_density_method     'not measured'
_exptl_crystal_F_000              624 
_exptl_absorpt_coefficient_mu     0.983 
_exptl_absorpt_correction_type    none
_exptl_absorpt_correction_T_min   ? 
_exptl_absorpt_correction_T_max   ? 
 
_exptl_special_details 
; 
 ? 
; 
 
_diffrn_ambient_temperature       200(2) 
_diffrn_radiation_wavelength      0.71073 
_diffrn_radiation_type            MoK\a 
_diffrn_radiation_source          'fine-focus sealed tube' 
_diffrn_radiation_monochromator   graphite 
_diffrn_measurement_device        'Nonius KappaCCD'
_diffrn_measurement_method        '\w scans'
_diffrn_standards_number          0
_diffrn_standards_interval_count  ? 
_diffrn_standards_interval_time   ? 
_diffrn_standards_decay_%         ? 
_diffrn_reflns_number             6729 
_diffrn_reflns_av_R_equivalents   0.042 
_diffrn_reflns_av_sigmaI/netI     0.0476 
_diffrn_reflns_limit_h_min        0 
_diffrn_reflns_limit_h_max        13 
_diffrn_reflns_limit_k_min        0 
_diffrn_reflns_limit_k_max        10 
_diffrn_reflns_limit_l_min        -18 
_diffrn_reflns_limit_l_max        17 
_diffrn_reflns_theta_min          1.77 
_diffrn_reflns_theta_max          23.97 
_reflns_number_total              2719 
_reflns_number_observed           1937 
_reflns_observed_criterion        'I>2\s(I)'
 
_computing_data_collection        'NONIUS COLLECT'
_computing_cell_refinement        'DENZO-SMN'
_computing_data_reduction         'DENZO-SMN'
_computing_structure_solution     'SHELXS-86 (Sheldrick, 1990)'
_computing_structure_refinement   'SHELXL-93 (Sheldrick, 1993)' 
_computing_molecular_graphics     'Siemens SHELXTL'
_computing_publication_material   'CIFTAB, Siemens SHELXTL'
 
_refine_special_details 
; 
 Refinement on F^2^ for ALL reflections except for 1 with very negative F^2^ 
 or flagged by the user for potential systematic errors.  Weighted R-factors 
 wR and all goodnesses of fit S are based on F^2^, conventional R-factors R 
 are based on F, with F set to zero for negative F^2^. The observed criterion 
 of F^2^ > 2sigma(F^2^) is used only for calculating _R_factor_obs etc. and is 
 not relevant to the choice of reflections for refinement.  R-factors based 
 on F^2^ are statistically about twice as large as those based on F, and R- 
 factors based on ALL data will be even larger. 
; 
 
_refine_ls_structure_factor_coef  Fsqd  
_refine_ls_matrix_type            full 
_refine_ls_weighting_scheme       calc
_refine_ls_weighting_details
 'w=1/[\s^2^(Fo^2^)+(0.0779P)^2^+0.0000P] where P=(Fo^2^+2Fc^2^)/3' 
_atom_sites_solution_primary      direct 
_atom_sites_solution_secondary    difmap 
_atom_sites_solution_hydrogens    geom 
_refine_ls_hydrogen_treatment     mixed
_refine_ls_extinction_method      none 
_refine_ls_extinction_coef        ? 
_refine_ls_number_reflns          2718 
_refine_ls_number_parameters      234 
_refine_ls_number_restraints      126 
_refine_ls_R_factor_all           0.0753 
_refine_ls_R_factor_obs           0.0484 
_refine_ls_wR_factor_all          0.1405 
_refine_ls_wR_factor_obs          0.1238 
_refine_ls_goodness_of_fit_all    1.065 
_refine_ls_goodness_of_fit_obs    1.133 
_refine_ls_restrained_S_all       1.062 
_refine_ls_restrained_S_obs       1.122 
_refine_ls_shift/esd_max          0.000 
_refine_ls_shift/esd_mean         0.000 
 
loop_ 
 _atom_site_label 
 _atom_site_type_symbol 
 _atom_site_fract_x 
 _atom_site_fract_y 
 _atom_site_fract_z 
 _atom_site_U_iso_or_equiv 
 _atom_site_thermal_displace_type 
 _atom_site_occupancy 
 _atom_site_calc_flag 
 _atom_site_refinement_flags 
 _atom_site_disorder_group 
Fe1 Fe 0.59925(5) 0.06634(6) 0.03473(3) 0.0487(2) Uani 1 d . . 
Si1 Si 0.76051(15) 0.32211(15) 0.04476(9) 0.0790(5) Uani 1 d D . 
Si2 Si 0.83707(11) 0.0659(2) 0.15935(8) 0.0697(4) Uani 1 d D . 
N1 N 0.5362(3) -0.0068(5) -0.0850(2) 0.0656(10) Uani 1 d . . 
H1 H 0.5132(3) 0.0698(5) -0.1210(2) 0.079 Uiso 1 calc R . 
N2 N 0.7399(3) 0.1590(4) 0.0842(2) 0.0549(9) Uani 1 d . . 
C1 C 0.6018(4) -0.1057(5) -0.1295(3) 0.0682(12) Uani 1 d DU . 
C2 C 0.7021(11) -0.0224(16) -0.1528(11) 0.079(3) Uani 0.63(3) d PDU 1 
H2A H 0.7534(31) 0.0124(55) -0.1001(12) 0.119 Uiso 0.63(3) calc PR 1 
H2B H 0.6709(12) 0.0574(40) -0.1895(35) 0.119 Uiso 0.63(3) calc PR 1 
H2C H 0.7463(32) -0.0837(24) -0.1836(34) 0.119 Uiso 0.63(3) calc PR 1 
C3 C 0.5264(16) -0.1773(24) -0.2091(9) 0.111(4) Uani 0.63(3) d PDU 1 
H3A H 0.5735(23) -0.2458(65) -0.2326(31) 0.167 Uiso 0.63(3) calc PR 1 
H3B H 0.4968(59) -0.1060(26) -0.2527(22) 0.167 Uiso 0.63(3) calc PR 1 
H3C H 0.4611(40) -0.2255(72) -0.1925(14) 0.167 Uiso 0.63(3) calc PR 1 
C4 C 0.6522(15) -0.2205(15) -0.0641(9) 0.085(3) Uani 0.63(3) d PDU 1 
H4A H 0.5886(15) -0.2708(46) -0.0465(32) 0.128 Uiso 0.63(3) calc PR 1 
H4B H 0.7022(46) -0.1770(16) -0.0137(19) 0.128 Uiso 0.63(3) calc PR 1 
H4C H 0.6979(47) -0.2867(39) -0.0905(15) 0.128 Uiso 0.63(3) calc PR 1 
C2' C 0.7255(14) -0.0613(37) -0.1359(21) 0.097(6) Uani 0.37(3) d PDU 2 
H2'A H 0.7576(42) -0.1309(75) -0.1699(68) 0.146 Uiso 0.37(3) calc PR 2 
H2'B H 0.7750(30) -0.0557(126) -0.0781(21) 0.146 Uiso 0.37(3) calc PR 2 
H2'C H 0.7226(19) 0.0309(67) -0.1638(71) 0.146 Uiso 0.37(3) calc PR 2 
C3' C 0.5240(23) -0.1231(33) -0.2196(10) 0.083(5) Uani 0.37(3) d PDU 2 
H3'A H 0.5608(52) -0.1884(96) -0.2532(26) 0.125 Uiso 0.37(3) calc PR 2 
H3'B H 0.5134(83) -0.0315(38) -0.2485(29) 0.125 Uiso 0.37(3) calc PR 2 
H3'C H 0.4483(41) -0.1603(117) -0.2144(11) 0.125 Uiso 0.37(3) calc PR 2 
C4' C 0.6100(28) -0.2472(20) -0.0814(17) 0.094(5) Uani 0.37(3) d PDU 2 
H4'A H 0.6879(41) -0.2868(62) -0.0765(68) 0.141 Uiso 0.37(3) calc PR 2 
H4'B H 0.5521(72) -0.3125(46) -0.1133(44) 0.141 Uiso 0.37(3) calc PR 2 
H4'C H 0.5951(107) -0.2321(28) -0.0239(33) 0.141 Uiso 0.37(3) calc PR 2 
C5 C 0.9104(9) 0.3526(26) 0.0253(14) 0.138(6) Uani 0.73(4) d PDU 1 
H51 H 0.9182(26) 0.4512(33) 0.0093(55) 0.208 Uiso 0.73(4) calc PR 1 
H52 H 0.9229(29) 0.2914(69) -0.0215(40) 0.208 Uiso 0.73(4) calc PR 1 
H53 H 0.9682(9) 0.3312(91) 0.0777(22) 0.208 Uiso 0.73(4) calc PR 1 
C6 C 0.7348(27) 0.4727(17) 0.1143(12) 0.125(6) Uani 0.73(4) d PDU 1 
H61 H 0.6516(29) 0.4796(58) 0.1137(46) 0.188 Uiso 0.73(4) calc PR 1 
H62 H 0.7611(69) 0.5603(20) 0.0922(33) 0.188 Uiso 0.73(4) calc PR 1 
H63 H 0.7781(67) 0.4570(46) 0.1733(16) 0.188 Uiso 0.73(4) calc PR 1 
C7 C 0.6611(17) 0.3543(26) -0.0629(9) 0.104(5) Uani 0.73(4) d PDU 1 
H71 H 0.6861(42) 0.4392(48) -0.0889(22) 0.156 Uiso 0.73(4) calc PR 1 
H72 H 0.5814(20) 0.3670(84) -0.0553(10) 0.156 Uiso 0.73(4) calc PR 1 
H73 H 0.6641(51) 0.2735(40) -0.1006(18) 0.156 Uiso 0.73(4) calc PR 1 
C8 C 0.7623(6) -0.0781(8) 0.2073(5) 0.085(2) Uani 0.853(11) d PDU 1 
H81 H 0.8198(8) -0.1305(32) 0.2494(23) 0.128 Uiso 0.853(11) calc PR 1 
H82 H 0.7239(34) -0.1420(28) 0.1617(7) 0.128 Uiso 0.853(11) calc PR 1 
H83 H 0.7043(29) -0.0370(8) 0.2359(26) 0.128 Uiso 0.853(11) calc PR 1 
C9 C 0.9492(7) -0.0245(12) 0.1096(6) 0.125(4) Uani 0.853(11) d PDU 1 
H91 H 0.9111(11) -0.0949(49) 0.0680(32) 0.187 Uiso 0.853(11) calc PR 1 
H92 H 1.0068(33) -0.0709(59) 0.1547(8) 0.187 Uiso 0.853(11) calc PR 1 
H93 H 0.9881(39) 0.0452(16) 0.0802(36) 0.187 Uiso 0.853(11) calc PR 1 
C10 C 0.9132(9) 0.1774(10) 0.2511(5) 0.141(4) Uani 0.853(11) d PDU 1 
H10A H 0.9508(21) 0.1168(10) 0.2988(8) 0.212 Uiso 0.853(11) calc PR 1 
H10B H 0.8566(8) 0.2385(17) 0.2702(7) 0.212 Uiso 0.853(11) calc PR 1 
H10C H 0.9720(8) 0.2354(16) 0.2324(7) 0.212 Uiso 0.853(11) calc PR 1 
C5' C 0.8996(9) 0.3098(13) 0.0050(5) 0.133(10) Uani 0.27(4) d PRDU 2 
H5'A H 0.9242(9) 0.4043(13) -0.0081(5) 0.200 Uiso 0.27(4) calc PR 2 
H5'B H 0.8869(9) 0.2519(14) -0.0471(5) 0.200 Uiso 0.27(4) calc PR 2 
H5'C H 0.9601(9) 0.2669(15) 0.0495(6) 0.200 Uiso 0.27(4) calc PR 2 
C6' C 0.7591(74) 0.4405(42) 0.1394(20) 0.127(10) Uani 0.27(4) d PDU 2 
H6'A H 0.7389(212) 0.5365(71) 0.1190(21) 0.191 Uiso 0.27(4) calc PR 2 
H6'B H 0.8362(86) 0.4405(180) 0.1778(74) 0.191 Uiso 0.27(4) calc PR 2 
H6'C H 0.7014(149) 0.4062(150) 0.1707(88) 0.191 Uiso 0.27(4) calc PR 2 
C7' C 0.6285(32) 0.3539(70) -0.0439(29) 0.103(11) Uani 0.27(4) d PDU 2 
H7'A H 0.6363(85) 0.4446(121) -0.0714(89) 0.155 Uiso 0.27(4) calc PR 2 
H7'B H 0.5588(38) 0.3551(205) -0.0196(33) 0.155 Uiso 0.27(4) calc PR 2 
H7'C H 0.6218(96) 0.2786(134) -0.0867(65) 0.155 Uiso 0.27(4) calc PR 2 
C8' C 0.7909(44) -0.1238(21) 0.1620(33) 0.103(10) Uani 0.147(11) d PDU 2 
H8'A H 0.8488(152) -0.1756(82) 0.2041(161) 0.155 Uiso 0.147(11) calc PR 2 
H8'B H 0.7846(284) -0.1658(100) 0.1049(67) 0.155 Uiso 0.147(11) calc PR 2 
H8'C H 0.7154(142) -0.1287(30) 0.1783(207) 0.155 Uiso 0.147(11) calc PR 2 
C9' C 0.9884(21) 0.0875(79) 0.1394(39) 0.135(11) Uani 0.147(11) d PDU 2 
H9'A H 0.9877(75) 0.0663(431) 0.0791(77) 0.202 Uiso 0.147(11) calc PR 2 
H9'B H 1.0414(74) 0.0228(333) 0.1766(200) 0.202 Uiso 0.147(11) calc PR 2 
H9'C H 1.0145(145) 0.1845(147) 0.1522(262) 0.202 Uiso 0.147(11) calc PR 2 
C10' C 0.8302(47) 0.1478(62) 0.2665(18) 0.133(11) Uani 0.147(11) d PDU 2 
H10D H 0.9086(69) 0.1750(413) 0.2967(121) 0.200 Uiso 0.147(11) calc PR 2 
H10E H 0.7982(343) 0.0795(160) 0.3013(106) 0.200 Uiso 0.147(11) calc PR 2 
H10F H 0.7803(301) 0.2313(260) 0.2569(21) 0.200 Uiso 0.147(11) calc PR 2 
 
loop_ 
 _atom_site_aniso_label 
 _atom_site_aniso_U_11 
 _atom_site_aniso_U_22 
 _atom_site_aniso_U_33 
 _atom_site_aniso_U_23 
 _atom_site_aniso_U_13 
 _atom_site_aniso_U_12 
Fe1 0.0445(4) 0.0523(4) 0.0494(4) -0.0051(3) 0.0104(3) -0.0036(3) 
Si1 0.1098(12) 0.0644(9) 0.0650(8) -0.0065(7) 0.0235(8) -0.0333(9) 
Si2 0.0456(7) 0.1037(12) 0.0566(7) 0.0104(7) 0.0042(6) -0.0072(7) 
N1 0.060(2) 0.077(3) 0.061(2) -0.013(2) 0.016(2) -0.006(2) 
N2 0.052(2) 0.059(2) 0.053(2) -0.003(2) 0.009(2) -0.013(2) 
C1 0.057(3) 0.081(3) 0.071(3) -0.028(2) 0.026(2) -0.002(2) 
C2 0.060(5) 0.102(8) 0.086(7) -0.011(5) 0.037(5) 0.007(5) 
C3 0.088(6) 0.137(11) 0.109(7) -0.073(7) 0.020(5) -0.009(8) 
C4 0.078(8) 0.064(6) 0.120(7) -0.012(5) 0.033(5) -0.002(5) 
C2' 0.059(7) 0.137(13) 0.101(11) -0.036(10) 0.030(8) 0.000(9) 
C3' 0.073(8) 0.100(12) 0.080(7) -0.047(7) 0.024(6) 0.005(9) 
C4' 0.078(12) 0.085(9) 0.112(10) -0.024(8) 0.004(9) 0.009(8) 
C5 0.141(8) 0.111(11) 0.181(10) -0.001(10) 0.074(7) -0.071(7) 
C6 0.254(17) 0.053(8) 0.066(8) -0.002(7) 0.027(11) -0.008(9) 
C7 0.173(11) 0.068(6) 0.070(6) 0.021(6) 0.023(7) -0.017(8) 
C8 0.071(4) 0.102(5) 0.081(5) 0.037(4) 0.011(3) 0.012(4) 
C9 0.072(5) 0.189(11) 0.121(7) 0.046(7) 0.038(5) 0.038(6) 
C10 0.129(9) 0.178(9) 0.089(5) 0.002(6) -0.040(5) -0.051(7) 
C5' 0.139(15) 0.100(18) 0.175(18) 0.011(17) 0.065(14) -0.084(12) 
C6' 0.257(23) 0.033(13) 0.083(17) 0.024(13) 0.016(19) -0.002(15) 
C7' 0.166(18) 0.055(12) 0.084(15) 0.049(14) 0.015(16) -0.018(16) 
C8' 0.097(18) 0.113(18) 0.088(19) 0.045(17) -0.007(17) 0.005(17) 
C9' 0.075(18) 0.195(23) 0.135(20) 0.028(20) 0.025(17) 0.035(19) 
C10' 0.122(21) 0.169(20) 0.082(17) 0.000(17) -0.040(18) -0.043(20) 
 
_geom_special_details 
; 
 All esds (except the esd in the dihedral angle between two l.s. planes) 
 are estimated using the full covariance matrix.  The cell esds are taken 
 into account individually in the estimation of esds in distances, angles 
 and torsion angles; correlations between esds in cell parameters are only 
 used when they are defined by crystal symmetry.  An approximate (isotropic) 
 treatment of cell esds is used for estimating esds involving l.s. planes. 
; 
 
loop_ 
 _geom_bond_atom_site_label_1 
 _geom_bond_atom_site_label_2 
 _geom_bond_distance 
 _geom_bond_site_symmetry_2 
 _geom_bond_publ_flag 
Fe1 N2 1.893(3) . ? 
Fe1 N1 2.013(4) 3_655 ? 
Fe1 N1 2.015(3) . ? 
Fe1 Fe1 2.6785(11) 3_655 ? 
Si1 N2 1.709(4) . ? 
Si1 C6 1.874(7) . ? 
Si1 C5 1.880(7) . ? 
Si1 C7 1.882(7) . ? 
Si1 C5' 1.883(10) . ? 
Si1 C6' 1.884(10) . ? 
Si1 C7' 1.887(10) . ? 
Si2 N2 1.714(4) . ? 
Si2 C10 1.871(6) . ? 
Si2 C8 1.876(5) . ? 
Si2 C8' 1.887(10) . ? 
Si2 C9' 1.888(10) . ? 
Si2 C9 1.888(6) . ? 
Si2 C10' 1.892(10) . ? 
N1 C1 1.491(6) . ? 
N1 Fe1 2.013(4) 3_655 ? 
C1 C2 1.532(7) . ? 
C1 C3' 1.536(9) . ? 
C1 C4 1.536(7) . ? 
C1 C4' 1.540(9) . ? 
C1 C3 1.540(7) . ? 
C1 C2' 1.541(9) . ? 
 
loop_ 
 _geom_angle_atom_site_label_1 
 _geom_angle_atom_site_label_2 
 _geom_angle_atom_site_label_3 
 _geom_angle 
 _geom_angle_site_symmetry_1 
 _geom_angle_site_symmetry_3 
 _geom_angle_publ_flag 
N2 Fe1 N1 131.55(14) . 3_655 ? 
N2 Fe1 N1 131.81(14) . . ? 
N1 Fe1 N1 96.64(13) 3_655 . ? 
N2 Fe1 Fe1 179.62(11) . 3_655 ? 
N1 Fe1 Fe1 48.34(10) 3_655 3_655 ? 
N1 Fe1 Fe1 48.30(11) . 3_655 ? 
N2 Si1 C6 115.0(7) . . ? 
N2 Si1 C5 114.4(6) . . ? 
C6 Si1 C5 104.9(12) . . ? 
N2 Si1 C7 111.9(8) . . ? 
C6 Si1 C7 105.4(10) . . ? 
C5 Si1 C7 104.4(7) . . ? 
N2 Si1 C5' 105.6(4) . . ? 
N2 Si1 C6' 102.8(16) . . ? 
C5' Si1 C6' 117.6(27) . . ? 
N2 Si1 C7' 105.1(18) . . ? 
C5' Si1 C7' 113.3(19) . . ? 
C6' Si1 C7' 110.8(28) . . ? 
N2 Si2 C10 112.9(3) . . ? 
N2 Si2 C8 111.1(2) . . ? 
C10 Si2 C8 106.5(4) . . ? 
N2 Si2 C8' 110.9(13) . . ? 
N2 Si2 C9' 109.9(18) . . ? 
C8' Si2 C9' 113.2(25) . . ? 
N2 Si2 C9 111.4(3) . . ? 
C10 Si2 C9 108.9(4) . . ? 
C8 Si2 C9 105.7(4) . . ? 
N2 Si2 C10' 105.4(17) . . ? 
C8' Si2 C10' 107.7(24) . . ? 
C9' Si2 C10' 109.3(24) . . ? 
C1 N1 Fe1 123.2(3) . 3_655 ? 
C1 N1 Fe1 123.0(3) . . ? 
Fe1 N1 Fe1 83.36(13) 3_655 . ? 
Si1 N2 Si2 126.8(2) . . ? 
Si1 N2 Fe1 116.7(2) . . ? 
Si2 N2 Fe1 116.4(2) . . ? 
N1 C1 C2 107.1(7) . . ? 
N1 C1 C3' 104.2(12) . . ? 
N1 C1 C4 106.8(7) . . ? 
C2 C1 C4 109.0(6) . . ? 
N1 C1 C4' 107.3(12) . . ? 
C3' C1 C4' 109.4(8) . . ? 
N1 C1 C3 113.8(9) . . ? 
C2 C1 C3 111.6(6) . . ? 
C4 C1 C3 108.4(6) . . ? 
N1 C1 C2' 116.9(14) . . ? 
C3' C1 C2' 110.6(8) . . ? 
C4' C1 C2' 108.2(8) . . ? 
 
loop_ 
 _geom_torsion_atom_site_label_1 
 _geom_torsion_atom_site_label_2 
 _geom_torsion_atom_site_label_3 
 _geom_torsion_atom_site_label_4 
 _geom_torsion 
 _geom_torsion_site_symmetry_1 
 _geom_torsion_site_symmetry_2 
 _geom_torsion_site_symmetry_3 
 _geom_torsion_site_symmetry_4 
 _geom_torsion_publ_flag 
 N2 Fe1 N1 C1 53.9(4) . . . . ? 
 N1 Fe1 N1 C1 -125.6(4) 3_655 . . . ? 
 Fe1 Fe1 N1 C1 -125.6(4) 3_655 . . . ? 
 N2 Fe1 N1 Fe1 179.5(2) . . . 3_655 ? 
 N1 Fe1 N1 Fe1 0.0 3_655 . . 3_655 ? 
 Fe1 Fe1 N1 Fe1 0.0 3_655 . . 3_655 ? 
 C6 Si1 N2 Si2 -81.9(11) . . . . ? 
 C5 Si1 N2 Si2 39.5(10) . . . . ? 
 C7 Si1 N2 Si2 157.9(8) . . . . ? 
 C5' Si1 N2 Si2 53.6(3) . . . . ? 
 C6' Si1 N2 Si2 -70.3(26) . . . . ? 
 C7' Si1 N2 Si2 173.7(22) . . . . ? 
 C6 Si1 N2 Fe1 102.4(10) . . . . ? 
 C5 Si1 N2 Fe1 -136.2(9) . . . . ? 
 C7 Si1 N2 Fe1 -17.8(9) . . . . ? 
 C5' Si1 N2 Fe1 -122.1(3) . . . . ? 
 C6' Si1 N2 Fe1 114.0(26) . . . . ? 
 C7' Si1 N2 Fe1 -2.0(22) . . . . ? 
 C10 Si2 N2 Si1 42.8(5) . . . . ? 
 C8 Si2 N2 Si1 162.3(4) . . . . ? 
 C8' Si2 N2 Si1 -165.9(21) . . . . ? 
 C9' Si2 N2 Si1 -39.9(25) . . . . ? 
 C9 Si2 N2 Si1 -80.2(5) . . . . ? 
 C10' Si2 N2 Si1 77.8(20) . . . . ? 
 C10 Si2 N2 Fe1 -141.5(4) . . . . ? 
 C8 Si2 N2 Fe1 -22.0(4) . . . . ? 
 C8' Si2 N2 Fe1 9.8(21) . . . . ? 
 C9' Si2 N2 Fe1 135.7(25) . . . . ? 
 C9 Si2 N2 Fe1 95.5(5) . . . . ? 
 C10' Si2 N2 Fe1 -106.5(20) . . . . ? 
 N1 Fe1 N2 Si1 -115.7(2) 3_655 . . . ? 
 N1 Fe1 N2 Si1 64.9(3) . . . . ? 
 Fe1 Fe1 N2 Si1 171.8(1000) 3_655 . . . ? 
 N1 Fe1 N2 Si2 68.2(3) 3_655 . . . ? 
 N1 Fe1 N2 Si2 -111.2(2) . . . . ? 
 Fe1 Fe1 N2 Si2 -4.3(151) 3_655 . . . ? 
 Fe1 N1 C1 C2 -176.4(7) 3_655 . . . ? 
 Fe1 N1 C1 C2 -71.3(8) . . . . ? 
 Fe1 N1 C1 C3' 78.7(12) 3_655 . . . ? 
 Fe1 N1 C1 C3' -176.3(12) . . . . ? 
 Fe1 N1 C1 C4 -59.7(9) 3_655 . . . ? 
 Fe1 N1 C1 C4 45.3(9) . . . . ? 
 Fe1 N1 C1 C4' -37.3(13) 3_655 . . . ? 
 Fe1 N1 C1 C4' 67.8(13) . . . . ? 
 Fe1 N1 C1 C3 59.8(10) 3_655 . . . ? 
 Fe1 N1 C1 C3 164.9(9) . . . . ? 
 Fe1 N1 C1 C2' -159.0(14) 3_655 . . . ? 
 Fe1 N1 C1 C2' -53.9(14) . . . . ? 

_diffrn_measured_fraction_theta_max    0.998 
_diffrn_reflns_theta_full              23.97 
_diffrn_measured_fraction_theta_full   0.998  
_refine_diff_density_max    0.715 
_refine_diff_density_min   -0.333 
_refine_diff_density_rms    0.060 

 #===END


data_249_14 
 
_audit_creation_method            SHELXL 
_chemical_name_systematic 
; 
 ? 
; 
_chemical_name_common             'Fe2(mu-NHtBu)(mu-S)[N(TMS)2]2'
_chemical_formula_moiety          
 '(Fe 3+)2 (C4H10N -)2 (S 2-) (C6H18NSi2 1-)2'
_chemical_formula_structural      'Fe2(NC4H10)2S(NSi2C6H18)2 '
_chemical_formula_analytical      ? 
_chemical_formula_sum             'C20 H56 Fe2 N4 S Si4' 
_chemical_formula_weight          608.81 
_chemical_melting_point           ? 
_chemical_compound_source         'Chemical synthesis, S.C. Lee lab'
 
loop_ 
 _atom_type_symbol 
 _atom_type_description 
 _atom_type_scat_dispersion_real 
 _atom_type_scat_dispersion_imag 
 _atom_type_scat_source 
 'C'  'C'   0.0033   0.0016 
 'International Tables Vol C Tables 4.2.6.8 and 6.1.1.4' 
 'H'  'H'   0.0000   0.0000 
 'International Tables Vol C Tables 4.2.6.8 and 6.1.1.4' 
 'N'  'N'   0.0061   0.0033 
 'International Tables Vol C Tables 4.2.6.8 and 6.1.1.4' 
 'Si'  'Si'   0.0817   0.0704 
 'International Tables Vol C Tables 4.2.6.8 and 6.1.1.4' 
 'S'  'S'   0.1246   0.1234 
 'International Tables Vol C Tables 4.2.6.8 and 6.1.1.4' 
 'Fe'  'Fe'   0.3463   0.8444 
 'International Tables Vol C Tables 4.2.6.8 and 6.1.1.4' 
 
_symmetry_cell_setting            monoclinic
_symmetry_space_group_name_H-M    'P 1 21/n 1'
 
loop_ 
 _symmetry_equiv_pos_as_xyz 
 'x, y, z' 
 '-x+1/2, y+1/2, -z+1/2' 
 '-x, -y, -z' 
 'x-1/2, -y-1/2, z-1/2' 
 
_cell_length_a                    16.4939(8) 
_cell_length_b                    9.0249(5) 
_cell_length_c                    23.5935(13) 
_cell_angle_alpha                 90.00 
_cell_angle_beta                  101.945(2) 
_cell_angle_gamma                 90.00 
_cell_volume                      3436.0(3) 
_cell_formula_units_Z             4 
_cell_measurement_temperature     200(2) 
_cell_measurement_reflns_used     14125 
_cell_measurement_theta_min       1.38 
_cell_measurement_theta_max       26.09
 
_exptl_crystal_description        blocks
_exptl_crystal_colour             black
_exptl_crystal_size_max           0.18 
_exptl_crystal_size_mid           0.12 
_exptl_crystal_size_min           0.08 
_exptl_crystal_density_meas       ? 
_exptl_crystal_density_diffrn     1.177 
_exptl_crystal_density_method     'not measured'
_exptl_crystal_F_000              1312 
_exptl_absorpt_coefficient_mu     1.059 
_exptl_absorpt_correction_type    none
_exptl_absorpt_correction_T_min   ? 
_exptl_absorpt_correction_T_max   ? 
 
_exptl_special_details 
; 
 ? 
; 
 
_diffrn_ambient_temperature       200(2) 
_diffrn_radiation_wavelength      0.71073 
_diffrn_radiation_type            MoK\a 
_diffrn_radiation_source          'fine-focus sealed tube' 
_diffrn_radiation_monochromator   graphite 
_diffrn_measurement_device        'Nonius KappaCCD'
_diffrn_measurement_method        '\w scans'
_diffrn_standards_number          0
_diffrn_standards_interval_count  ? 
_diffrn_standards_interval_time   ? 
_diffrn_standards_decay_%         ? 
_diffrn_reflns_number             14125
_diffrn_reflns_av_R_equivalents   0.073
_diffrn_reflns_av_sigmaI/netI     0.1149 
_diffrn_reflns_limit_h_min        0 
_diffrn_reflns_limit_h_max        20 
_diffrn_reflns_limit_k_min        0 
_diffrn_reflns_limit_k_max        10 
_diffrn_reflns_limit_l_min        -29 
_diffrn_reflns_limit_l_max        28 
_diffrn_reflns_theta_min          1.38 
_diffrn_reflns_theta_max          26.09 
_reflns_number_total              6716 
_reflns_number_observed           3658 
_reflns_observed_criterion        'I>2\s(I)'
 
_computing_data_collection        'NONIUS COLLECT'
_computing_cell_refinement        'DENZO-SMN'
_computing_data_reduction         'DENZO-SMN'
_computing_structure_solution     'SHELXS-86 (Sheldrick, 1990)'
_computing_structure_refinement   'SHELXL-93 (Sheldrick, 1993)' 
_computing_molecular_graphics     'Siemens SHELXTL'
_computing_publication_material   'CIFTAB, Siemens SHELXTL'
 
_refine_special_details 
; 
 Refinement on F^2^ for ALL reflections except for 0 with very negative F^2^ 
 or flagged by the user for potential systematic errors.  Weighted R-factors 
 wR and all goodnesses of fit S are based on F^2^, conventional R-factors R 
 are based on F, with F set to zero for negative F^2^. The observed criterion 
 of F^2^ > 2sigma(F^2^) is used only for calculating _R_factor_obs etc. and is 
 not relevant to the choice of reflections for refinement.  R-factors based 
 on F^2^ are statistically about twice as large as those based on F, and R- 
 factors based on ALL data will be even larger. 
; 
 
_refine_ls_structure_factor_coef  Fsqd  
_refine_ls_matrix_type            full 
_refine_ls_weighting_scheme       calc
_refine_ls_weighting_details
 'w=1/[\s^2^(Fo^2^)+(0.0779P)^2^+0.0000P] where P=(Fo^2^+2Fc^2^)/3' 
_atom_sites_solution_primary      direct 
_atom_sites_solution_secondary    difmap 
_atom_sites_solution_hydrogens    geom 
_refine_ls_hydrogen_treatment     mixed
_refine_ls_extinction_method      none 
_refine_ls_extinction_coef        ? 
_refine_ls_number_reflns          6716 
_refine_ls_number_parameters      304 
_refine_ls_number_restraints      0 
_refine_ls_R_factor_all           0.1409 
_refine_ls_R_factor_obs           0.0604 
_refine_ls_wR_factor_all          0.1301 
_refine_ls_wR_factor_obs          0.1053 
_refine_ls_goodness_of_fit_all    1.027 
_refine_ls_goodness_of_fit_obs    1.144 
_refine_ls_restrained_S_all       1.027 
_refine_ls_restrained_S_obs       1.144 
_refine_ls_shift/esd_max          0.001 
_refine_ls_shift/esd_mean         0.000 
 
loop_ 
 _atom_site_label 
 _atom_site_type_symbol 
 _atom_site_fract_x 
 _atom_site_fract_y 
 _atom_site_fract_z 
 _atom_site_U_iso_or_equiv 
 _atom_site_thermal_displace_type 
 _atom_site_occupancy 
 _atom_site_calc_flag 
 _atom_site_refinement_flags 
 _atom_site_disorder_group 
Fe1 Fe 0.53620(4) 0.55168(7) 0.79984(2) 0.0256(2) Uani 1 d . . 
Fe2 Fe 0.47150(4) 0.44769(7) 0.70508(2) 0.0260(2) Uani 1 d . . 
Si1 Si 0.64174(9) 0.5242(2) 0.92427(5) 0.0394(4) Uani 1 d . . 
Si2 Si 0.56090(9) 0.8220(2) 0.88310(6) 0.0408(4) Uani 1 d . . 
Si3 Si 0.45506(9) 0.2017(2) 0.61230(6) 0.0412(4) Uani 1 d . . 
Si4 Si 0.35082(8) 0.4841(2) 0.58544(5) 0.0343(4) Uani 1 d . . 
S1 S 0.56157(8) 0.32275(14) 0.77157(5) 0.0356(3) Uani 1 d . . 
N1 N 0.5387(2) 0.6414(4) 0.72067(15) 0.0275(10) Uani 1 d . . 
H1 H 0.4981(27) 0.7014(48) 0.7104(19) 0.041 Uiso 1 d . . 
N2 N 0.4115(2) 0.5324(4) 0.76617(15) 0.0263(9) Uani 1 d . . 
H2 H 0.3924(27) 0.6158(46) 0.7526(18) 0.039 Uiso 1 d . . 
N3 N 0.5810(2) 0.6362(4) 0.87249(14) 0.0322(10) Uani 1 d . . 
N4 N 0.4239(2) 0.3764(4) 0.63075(14) 0.0313(9) Uani 1 d . . 
C1 C 0.6129(3) 0.6846(5) 0.6976(2) 0.0335(12) Uani 1 d . . 
C2 C 0.6806(3) 0.5742(6) 0.7152(3) 0.079(2) Uani 1 d . . 
H2A H 0.7279(10) 0.6012(25) 0.6982(14) 0.118 Uiso 1 calc R . 
H2B H 0.6606(8) 0.4756(10) 0.7015(14) 0.118 Uiso 1 calc R . 
H2C H 0.6977(17) 0.5731(31) 0.7575(3) 0.118 Uiso 1 calc R . 
C3 C 0.5879(3) 0.6916(7) 0.6315(2) 0.068(2) Uani 1 d . . 
H3A H 0.6345(8) 0.7287(38) 0.6157(2) 0.102 Uiso 1 calc R . 
H3B H 0.5404(14) 0.7584(31) 0.6202(2) 0.102 Uiso 1 calc R . 
H3C H 0.5727(21) 0.5923(9) 0.6161(2) 0.102 Uiso 1 calc R . 
C4 C 0.6422(3) 0.8347(6) 0.7212(2) 0.065(2) Uani 1 d . . 
H4A H 0.5978(8) 0.9075(9) 0.7093(12) 0.097 Uiso 1 calc R . 
H4B H 0.6908(13) 0.8642(18) 0.7061(12) 0.097 Uiso 1 calc R . 
H4C H 0.6570(20) 0.8302(11) 0.7636(2) 0.097 Uiso 1 calc R . 
C5 C 0.3490(3) 0.4600(5) 0.7945(2) 0.0315(11) Uani 1 d . . 
C6 C 0.2671(3) 0.4485(6) 0.7508(2) 0.057(2) Uani 1 d . . 
H6A H 0.2257(6) 0.4006(32) 0.7691(5) 0.085 Uiso 1 calc R . 
H6B H 0.2750(5) 0.3896(29) 0.7175(7) 0.085 Uiso 1 calc R . 
H6C H 0.2479(10) 0.5480(6) 0.7378(10) 0.085 Uiso 1 calc R . 
C7 C 0.3378(3) 0.5534(6) 0.8457(2) 0.056(2) Uani 1 d . . 
H7A H 0.2961(15) 0.5075(20) 0.8642(9) 0.084 Uiso 1 calc R . 
H7B H 0.3195(20) 0.6530(13) 0.8323(3) 0.084 Uiso 1 calc R . 
H7C H 0.3906(6) 0.5600(30) 0.8738(7) 0.084 Uiso 1 calc R . 
C8 C 0.3774(3) 0.3061(5) 0.8156(2) 0.053(2) Uani 1 d . . 
H8A H 0.3357(9) 0.2607(14) 0.8343(12) 0.080 Uiso 1 calc R . 
H8B H 0.4302(10) 0.3131(6) 0.8436(10) 0.080 Uiso 1 calc R . 
H8C H 0.3845(18) 0.2451(11) 0.7826(3) 0.080 Uiso 1 calc R . 
C9 C 0.5797(4) 0.3687(7) 0.9439(3) 0.088(2) Uani 1 d . . 
H9A H 0.5310(14) 0.4079(7) 0.9566(18) 0.131 Uiso 1 calc R . 
H9B H 0.6135(9) 0.3110(29) 0.9753(13) 0.131 Uiso 1 calc R . 
H9C H 0.5616(22) 0.3047(27) 0.9100(6) 0.131 Uiso 1 calc R . 
C10 C 0.6859(4) 0.6213(7) 0.9933(2) 0.098(3) Uani 1 d . . 
H10A H 0.7212(23) 0.5528(16) 1.0198(8) 0.147 Uiso 1 calc R . 
H10B H 0.6408(4) 0.6561(45) 1.0112(10) 0.147 Uiso 1 calc R . 
H10C H 0.7189(23) 0.7062(31) 0.9854(3) 0.147 Uiso 1 calc R . 
C11 C 0.7283(3) 0.4440(7) 0.8969(2) 0.085(2) Uani 1 d . . 
H11A H 0.7067(3) 0.3863(40) 0.8618(11) 0.127 Uiso 1 calc R . 
H11B H 0.7606(16) 0.3790(39) 0.9265(8) 0.127 Uiso 1 calc R . 
H11C H 0.7639(15) 0.5236(8) 0.8878(18) 0.127 Uiso 1 calc R . 
C12 C 0.5130(4) 0.8515(6) 0.9469(2) 0.072(2) Uani 1 d . . 
H12A H 0.4959(22) 0.9553(12) 0.9481(9) 0.108 Uiso 1 calc R . 
H12B H 0.5535(8) 0.8279(40) 0.9824(2) 0.108 Uiso 1 calc R . 
H12C H 0.4645(14) 0.7871(31) 0.9439(8) 0.108 Uiso 1 calc R . 
C13 C 0.6578(4) 0.9365(6) 0.8918(2) 0.072(2) Uani 1 d . . 
H13A H 0.6921(11) 0.9202(31) 0.9304(6) 0.107 Uiso 1 calc R . 
H13B H 0.6430(4) 1.0415(7) 0.8870(16) 0.107 Uiso 1 calc R . 
H13C H 0.6889(12) 0.9073(29) 0.8624(10) 0.107 Uiso 1 calc R . 
C14 C 0.4846(3) 0.8991(5) 0.8207(2) 0.0521(15) Uani 1 d . . 
H14A H 0.4759(14) 1.0046(9) 0.8274(6) 0.078 Uiso 1 calc R . 
H14B H 0.4319(7) 0.8460(22) 0.8168(8) 0.078 Uiso 1 calc R . 
H14C H 0.5059(9) 0.8874(31) 0.7852(3) 0.078 Uiso 1 calc R . 
C15 C 0.4230(3) 0.0613(5) 0.6609(2) 0.060(2) Uani 1 d . . 
H15A H 0.4485(17) 0.0846(22) 0.7013(3) 0.090 Uiso 1 calc R . 
H15B H 0.4410(19) -0.0371(7) 0.6511(10) 0.090 Uiso 1 calc R . 
H15C H 0.3625(4) 0.0625(27) 0.6561(11) 0.090 Uiso 1 calc R . 
C16 C 0.4089(4) 0.1455(7) 0.5361(2) 0.093(2) Uani 1 d . . 
H16A H 0.4263(23) 0.0442(19) 0.5294(6) 0.140 Uiso 1 calc R . 
H16B H 0.4280(21) 0.2132(30) 0.5091(2) 0.140 Uiso 1 calc R . 
H16C H 0.3484(4) 0.1496(47) 0.5299(6) 0.140 Uiso 1 calc R . 
C17 C 0.5689(3) 0.1946(5) 0.6191(2) 0.054(2) Uani 1 d . . 
H17A H 0.5848(4) 0.0970(13) 0.6067(13) 0.082 Uiso 1 calc R . 
H17B H 0.5963(3) 0.2117(34) 0.6595(3) 0.082 Uiso 1 calc R . 
H17C H 0.5859(4) 0.2714(23) 0.5946(10) 0.082 Uiso 1 calc R . 
C18 C 0.3347(3) 0.6626(5) 0.6220(2) 0.0451(13) Uani 1 d . . 
H18A H 0.2947(13) 0.7239(14) 0.5955(5) 0.068 Uiso 1 calc R . 
H18B H 0.3875(4) 0.7155(15) 0.6326(11) 0.068 Uiso 1 calc R . 
H18C H 0.3134(17) 0.6418(5) 0.6570(7) 0.068 Uiso 1 calc R . 
C19 C 0.2475(3) 0.3921(6) 0.5675(2) 0.061(2) Uani 1 d . . 
H19A H 0.2511(6) 0.3029(21) 0.5445(12) 0.091 Uiso 1 calc R . 
H19B H 0.2068(5) 0.4604(14) 0.5452(12) 0.091 Uiso 1 calc R . 
H19C H 0.2301(10) 0.3646(34) 0.6034(2) 0.091 Uiso 1 calc R . 
C20 C 0.3841(3) 0.5349(6) 0.5170(2) 0.056(2) Uani 1 d . . 
H20A H 0.3462(12) 0.6096(27) 0.4961(7) 0.084 Uiso 1 calc R . 
H20B H 0.3830(20) 0.4465(9) 0.4927(6) 0.084 Uiso 1 calc R . 
H20C H 0.4404(8) 0.5753(34) 0.5262(2) 0.084 Uiso 1 calc R . 
 
loop_ 
 _atom_site_aniso_label 
 _atom_site_aniso_U_11 
 _atom_site_aniso_U_22 
 _atom_site_aniso_U_33 
 _atom_site_aniso_U_23 
 _atom_site_aniso_U_13 
 _atom_site_aniso_U_12 
Fe1 0.0280(4) 0.0260(4) 0.0220(4) -0.0019(3) 0.0034(3) -0.0010(3) 
Fe2 0.0280(4) 0.0252(4) 0.0238(4) -0.0020(3) 0.0032(3) -0.0006(3) 
Si1 0.0355(8) 0.0562(11) 0.0242(7) -0.0003(7) 0.0011(6) 0.0066(7) 
Si2 0.0549(10) 0.0342(9) 0.0344(8) -0.0111(7) 0.0121(7) -0.0032(7) 
Si3 0.0526(10) 0.0328(9) 0.0355(8) -0.0097(7) 0.0032(7) 0.0037(7) 
Si4 0.0320(8) 0.0407(9) 0.0270(7) 0.0025(6) -0.0012(6) -0.0001(7) 
S1 0.0386(8) 0.0308(8) 0.0348(7) 0.0003(6) 0.0020(6) 0.0074(6) 
N1 0.027(2) 0.031(3) 0.024(2) -0.001(2) 0.005(2) -0.002(2) 
N2 0.026(2) 0.025(2) 0.029(2) 0.003(2) 0.008(2) -0.001(2) 
N3 0.035(2) 0.033(2) 0.027(2) -0.004(2) 0.004(2) -0.001(2) 
N4 0.038(2) 0.028(2) 0.024(2) -0.003(2) -0.001(2) 0.000(2) 
C1 0.029(3) 0.043(3) 0.032(3) -0.003(2) 0.013(2) -0.007(2) 
C2 0.049(4) 0.081(5) 0.119(6) 0.033(4) 0.049(4) 0.011(4) 
C3 0.071(4) 0.101(5) 0.039(3) -0.014(3) 0.027(3) -0.038(4) 
C4 0.072(4) 0.071(4) 0.058(4) -0.018(3) 0.032(3) -0.035(4) 
C5 0.028(3) 0.034(3) 0.035(3) -0.001(2) 0.013(2) -0.001(2) 
C6 0.034(3) 0.082(5) 0.054(4) 0.005(3) 0.009(3) -0.012(3) 
C7 0.054(4) 0.070(4) 0.055(4) -0.010(3) 0.034(3) -0.012(3) 
C8 0.045(3) 0.048(4) 0.074(4) 0.018(3) 0.028(3) -0.007(3) 
C9 0.070(5) 0.101(6) 0.084(5) 0.059(4) -0.001(4) 0.004(4) 
C10 0.129(7) 0.096(5) 0.048(4) -0.017(4) -0.033(4) 0.026(5) 
C11 0.043(4) 0.159(7) 0.049(4) 0.011(4) 0.001(3) 0.044(4) 
C12 0.101(5) 0.070(5) 0.053(4) -0.016(3) 0.032(4) 0.013(4) 
C13 0.091(5) 0.054(4) 0.068(4) -0.021(3) 0.011(4) -0.027(4) 
C14 0.071(4) 0.032(3) 0.053(4) -0.005(3) 0.013(3) 0.012(3) 
C15 0.063(4) 0.031(3) 0.089(4) -0.004(3) 0.023(3) -0.004(3) 
C16 0.132(7) 0.068(5) 0.062(4) -0.037(4) -0.021(4) 0.028(4) 
C17 0.066(4) 0.041(4) 0.063(4) -0.003(3) 0.029(3) 0.006(3) 
C18 0.048(3) 0.042(3) 0.041(3) 0.010(3) 0.001(2) 0.010(3) 
C19 0.044(4) 0.070(4) 0.061(4) 0.008(3) -0.003(3) -0.008(3) 
C20 0.057(4) 0.073(4) 0.038(3) 0.017(3) 0.012(3) 0.011(3) 
 
_geom_special_details 
; 
 All esds (except the esd in the dihedral angle between two l.s. planes) 
 are estimated using the full covariance matrix.  The cell esds are taken 
 into account individually in the estimation of esds in distances, angles 
 and torsion angles; correlations between esds in cell parameters are only 
 used when they are defined by crystal symmetry.  An approximate (isotropic) 
 treatment of cell esds is used for estimating esds involving l.s. planes. 
; 
 
loop_ 
 _geom_bond_atom_site_label_1 
 _geom_bond_atom_site_label_2 
 _geom_bond_distance 
 _geom_bond_site_symmetry_2 
 _geom_bond_publ_flag 
Fe1 N3 1.882(3) . ? 
Fe1 N1 2.044(4) . ? 
Fe1 N2 2.053(4) . ? 
Fe1 S1 2.2369(14) . ? 
Fe1 Fe2 2.4557(8) . ? 
Fe2 N4 1.881(3) . ? 
Fe2 N2 2.057(3) . ? 
Fe2 N1 2.062(4) . ? 
Fe2 S1 2.2304(13) . ? 
Si1 N3 1.735(4) . ? 
Si1 C11 1.834(5) . ? 
Si1 C9 1.852(6) . ? 
Si1 C10 1.861(5) . ? 
Si2 N3 1.738(4) . ? 
Si2 C12 1.858(5) . ? 
Si2 C14 1.862(5) . ? 
Si2 C13 1.878(5) . ? 
Si3 N4 1.741(4) . ? 
Si3 C17 1.852(5) . ? 
Si3 C15 1.859(5) . ? 
Si3 C16 1.871(5) . ? 
Si4 N4 1.734(4) . ? 
Si4 C19 1.864(5) . ? 
Si4 C20 1.868(4) . ? 
Si4 C18 1.872(5) . ? 
N1 C1 1.490(5) . ? 
N2 C5 1.490(5) . ? 
C1 C2 1.490(6) . ? 
C1 C4 1.506(6) . ? 
C1 C3 1.529(6) . ? 
C5 C8 1.516(6) . ? 
C5 C7 1.516(6) . ? 
C5 C6 1.524(6) . ? 
 
loop_ 
 _geom_angle_atom_site_label_1 
 _geom_angle_atom_site_label_2 
 _geom_angle_atom_site_label_3 
 _geom_angle 
 _geom_angle_site_symmetry_1 
 _geom_angle_site_symmetry_3 
 _geom_angle_publ_flag 
N3 Fe1 N1 126.4(2) . . ? 
N3 Fe1 N2 124.04(14) . . ? 
N1 Fe1 N2 83.59(14) . . ? 
N3 Fe1 S1 125.70(12) . . ? 
N1 Fe1 S1 93.04(11) . . ? 
N2 Fe1 S1 92.32(11) . . ? 
N3 Fe1 Fe2 177.25(11) . . ? 
N1 Fe1 Fe2 53.61(11) . . ? 
N2 Fe1 Fe2 53.39(10) . . ? 
S1 Fe1 Fe2 56.53(4) . . ? 
N4 Fe2 N2 127.7(2) . . ? 
N4 Fe2 N1 124.19(15) . . ? 
N2 Fe2 N1 83.05(14) . . ? 
N4 Fe2 S1 124.87(12) . . ? 
N2 Fe2 S1 92.41(11) . . ? 
N1 Fe2 S1 92.74(11) . . ? 
N4 Fe2 Fe1 177.12(11) . . ? 
N2 Fe2 Fe1 53.25(10) . . ? 
N1 Fe2 Fe1 52.93(10) . . ? 
S1 Fe2 Fe1 56.78(4) . . ? 
N3 Si1 C11 111.1(2) . . ? 
N3 Si1 C9 110.4(2) . . ? 
C11 Si1 C9 107.4(3) . . ? 
N3 Si1 C10 114.0(2) . . ? 
C11 Si1 C10 107.6(3) . . ? 
C9 Si1 C10 105.9(3) . . ? 
N3 Si2 C12 112.4(2) . . ? 
N3 Si2 C14 111.4(2) . . ? 
C12 Si2 C14 104.8(2) . . ? 
N3 Si2 C13 111.3(2) . . ? 
C12 Si2 C13 109.1(3) . . ? 
C14 Si2 C13 107.5(3) . . ? 
N4 Si3 C17 110.9(2) . . ? 
N4 Si3 C15 109.0(2) . . ? 
C17 Si3 C15 109.6(2) . . ? 
N4 Si3 C16 113.8(2) . . ? 
C17 Si3 C16 106.1(3) . . ? 
C15 Si3 C16 107.3(3) . . ? 
N4 Si4 C19 112.1(2) . . ? 
N4 Si4 C20 112.3(2) . . ? 
C19 Si4 C20 109.4(2) . . ? 
N4 Si4 C18 110.2(2) . . ? 
C19 Si4 C18 106.1(2) . . ? 
C20 Si4 C18 106.4(2) . . ? 
Fe2 S1 Fe1 66.69(4) . . ? 
C1 N1 Fe1 127.7(3) . . ? 
C1 N1 Fe2 127.5(3) . . ? 
Fe1 N1 Fe2 73.46(12) . . ? 
C5 N2 Fe1 126.4(3) . . ? 
C5 N2 Fe2 129.0(3) . . ? 
Fe1 N2 Fe2 73.37(12) . . ? 
Si1 N3 Si2 124.1(2) . . ? 
Si1 N3 Fe1 117.8(2) . . ? 
Si2 N3 Fe1 118.1(2) . . ? 
Si4 N4 Si3 123.8(2) . . ? 
Si4 N4 Fe2 119.1(2) . . ? 
Si3 N4 Fe2 117.1(2) . . ? 
C2 C1 N1 110.3(4) . . ? 
C2 C1 C4 109.5(5) . . ? 
N1 C1 C4 109.0(4) . . ? 
C2 C1 C3 109.9(4) . . ? 
N1 C1 C3 108.4(4) . . ? 
C4 C1 C3 109.8(4) . . ? 
N2 C5 C8 110.7(4) . . ? 
N2 C5 C7 108.9(4) . . ? 
C8 C5 C7 109.1(4) . . ? 
N2 C5 C6 109.0(4) . . ? 
C8 C5 C6 109.3(4) . . ? 
C7 C5 C6 109.8(4) . . ? 
 
loop_ 
 _geom_torsion_atom_site_label_1 
 _geom_torsion_atom_site_label_2 
 _geom_torsion_atom_site_label_3 
 _geom_torsion_atom_site_label_4 
 _geom_torsion 
 _geom_torsion_site_symmetry_1 
 _geom_torsion_site_symmetry_2 
 _geom_torsion_site_symmetry_3 
 _geom_torsion_site_symmetry_4 
 _geom_torsion_publ_flag 
 N3 Fe1 Fe2 N4 89.8(31) . . . . ? 
 N1 Fe1 Fe2 N4 -1.2(22) . . . . ? 
 N2 Fe1 Fe2 N4 110.8(22) . . . . ? 
 S1 Fe1 Fe2 N4 -125.7(22) . . . . ? 
 N3 Fe1 Fe2 N2 -21.0(23) . . . . ? 
 N1 Fe1 Fe2 N2 -112.0(2) . . . . ? 
 N2 Fe1 Fe2 N2 0.000(1) . . . . ? 
 S1 Fe1 Fe2 N2 123.49(13) . . . . ? 
 N3 Fe1 Fe2 N1 91.0(23) . . . . ? 
 N1 Fe1 Fe2 N1 0.0 . . . . ? 
 N2 Fe1 Fe2 N1 112.0(2) . . . . ? 
 S1 Fe1 Fe2 N1 -124.49(13) . . . . ? 
 N3 Fe1 Fe2 S1 -144.5(23) . . . . ? 
 N1 Fe1 Fe2 S1 124.49(13) . . . . ? 
 N2 Fe1 Fe2 S1 -123.49(13) . . . . ? 
 S1 Fe1 Fe2 S1 0.0 . . . . ? 
 N4 Fe2 S1 Fe1 177.15(14) . . . . ? 
 N2 Fe2 S1 Fe1 -41.97(10) . . . . ? 
 N1 Fe2 S1 Fe1 41.18(10) . . . . ? 
 Fe1 Fe2 S1 Fe1 0.0 . . . . ? 
 N3 Fe1 S1 Fe2 178.03(13) . . . . ? 
 N1 Fe1 S1 Fe2 -41.64(11) . . . . ? 
 N2 Fe1 S1 Fe2 42.06(10) . . . . ? 
 Fe2 Fe1 S1 Fe2 0.0 . . . . ? 
 N3 Fe1 N1 C1 58.5(4) . . . . ? 
 N2 Fe1 N1 C1 -173.4(4) . . . . ? 
 S1 Fe1 N1 C1 -81.4(4) . . . . ? 
 Fe2 Fe1 N1 C1 -124.9(4) . . . . ? 
 N3 Fe1 N1 Fe2 -176.58(14) . . . . ? 
 N2 Fe1 N1 Fe2 -48.49(12) . . . . ? 
 S1 Fe1 N1 Fe2 43.51(9) . . . . ? 
 Fe2 Fe1 N1 Fe2 0.0 . . . . ? 
 N4 Fe2 N1 C1 -54.9(4) . . . . ? 
 N2 Fe2 N1 C1 173.6(4) . . . . ? 
 S1 Fe2 N1 C1 81.5(3) . . . . ? 
 Fe1 Fe2 N1 C1 125.2(4) . . . . ? 
 N4 Fe2 N1 Fe1 179.93(14) . . . . ? 
 N2 Fe2 N1 Fe1 48.44(12) . . . . ? 
 S1 Fe2 N1 Fe1 -43.66(9) . . . . ? 
 Fe1 Fe2 N1 Fe1 0.0 . . . . ? 
 N3 Fe1 N2 C5 -54.6(4) . . . . ? 
 N1 Fe1 N2 C5 175.2(3) . . . . ? 
 S1 Fe1 N2 C5 82.4(3) . . . . ? 
 Fe2 Fe1 N2 C5 126.6(4) . . . . ? 
 N3 Fe1 N2 Fe2 178.81(14) . . . . ? 
 N1 Fe1 N2 Fe2 48.67(12) . . . . ? 
 S1 Fe1 N2 Fe2 -44.12(8) . . . . ? 
 Fe2 Fe1 N2 Fe2 0.0 . . . . ? 
 N4 Fe2 N2 C5 59.7(4) . . . . ? 
 N1 Fe2 N2 C5 -171.9(4) . . . . ? 
 S1 Fe2 N2 C5 -79.5(3) . . . . ? 
 Fe1 Fe2 N2 C5 -123.7(4) . . . . ? 
 N4 Fe2 N2 Fe1 -176.60(14) . . . . ? 
 N1 Fe2 N2 Fe1 -48.18(12) . . . . ? 
 S1 Fe2 N2 Fe1 44.29(8) . . . . ? 
 Fe1 Fe2 N2 Fe1 0.000(1) . . . . ? 
 C11 Si1 N3 Si2 -122.5(3) . . . . ? 
 C9 Si1 N3 Si2 118.4(3) . . . . ? 
 C10 Si1 N3 Si2 -0.8(4) . . . . ? 
 C11 Si1 N3 Fe1 56.0(3) . . . . ? 
 C9 Si1 N3 Fe1 -63.1(3) . . . . ? 
 C10 Si1 N3 Fe1 177.8(3) . . . . ? 
 C12 Si2 N3 Si1 -56.7(3) . . . . ? 
 C14 Si2 N3 Si1 -174.0(2) . . . . ? 
 C13 Si2 N3 Si1 66.0(3) . . . . ? 
 C12 Si2 N3 Fe1 124.7(3) . . . . ? 
 C14 Si2 N3 Fe1 7.4(3) . . . . ? 
 C13 Si2 N3 Fe1 -112.6(3) . . . . ? 
 N1 Fe1 N3 Si1 -132.3(2) . . . . ? 
 N2 Fe1 N3 Si1 118.4(2) . . . . ? 
 S1 Fe1 N3 Si1 -4.7(3) . . . . ? 
 Fe2 Fe1 N3 Si1 138.7(22) . . . . ? 
 N1 Fe1 N3 Si2 46.3(3) . . . . ? 
 N2 Fe1 N3 Si2 -63.0(3) . . . . ? 
 S1 Fe1 N3 Si2 173.97(13) . . . . ? 
 Fe2 Fe1 N3 Si2 -42.7(24) . . . . ? 
 C19 Si4 N4 Si3 61.6(3) . . . . ? 
 C20 Si4 N4 Si3 -62.0(3) . . . . ? 
 C18 Si4 N4 Si3 179.5(2) . . . . ? 
 C19 Si4 N4 Fe2 -116.9(3) . . . . ? 
 C20 Si4 N4 Fe2 119.4(3) . . . . ? 
 C18 Si4 N4 Fe2 1.0(3) . . . . ? 
 C17 Si3 N4 Si4 124.3(3) . . . . ? 
 C15 Si3 N4 Si4 -114.9(3) . . . . ? 
 C16 Si3 N4 Si4 4.8(4) . . . . ? 
 C17 Si3 N4 Fe2 -57.2(3) . . . . ? 
 C15 Si3 N4 Fe2 63.7(3) . . . . ? 
 C16 Si3 N4 Fe2 -176.6(3) . . . . ? 
 N2 Fe2 N4 Si4 49.7(3) . . . . ? 
 N1 Fe2 N4 Si4 -60.2(3) . . . . ? 
 S1 Fe2 N4 Si4 176.81(14) . . . . ? 
 Fe1 Fe2 N4 Si4 -59.1(23) . . . . ? 
 N2 Fe2 N4 Si3 -129.0(2) . . . . ? 
 N1 Fe2 N4 Si3 121.1(2) . . . . ? 
 S1 Fe2 N4 Si3 -1.8(3) . . . . ? 
 Fe1 Fe2 N4 Si3 122.3(21) . . . . ? 
 Fe1 N1 C1 C2 39.0(6) . . . . ? 
 Fe2 N1 C1 C2 -59.0(5) . . . . ? 
 Fe1 N1 C1 C4 -81.2(5) . . . . ? 
 Fe2 N1 C1 C4 -179.2(3) . . . . ? 
 Fe1 N1 C1 C3 159.4(3) . . . . ? 
 Fe2 N1 C1 C3 61.4(5) . . . . ? 
 Fe1 N2 C5 C8 -50.8(5) . . . . ? 
 Fe2 N2 C5 C8 47.3(5) . . . . ? 
 Fe1 N2 C5 C7 69.2(5) . . . . ? 
 Fe2 N2 C5 C7 167.3(3) . . . . ? 
 Fe1 N2 C5 C6 -171.0(3) . . . . ? 
 Fe2 N2 C5 C6 -72.9(5) . . . . ? 
 
_diffrn_measured_fraction_theta_max    0.985 
_diffrn_reflns_theta_full              26.09 
_diffrn_measured_fraction_theta_full   0.985 
_refine_diff_density_max    0.535 
_refine_diff_density_min   -0.378 
_refine_diff_density_rms    0.088 


#===END


 
data_sl35-wz 
 
_audit_creation_method            SHELXL-97 
_chemical_name_systematic 
; 
 'Fe2(mu-NHtBu)(mu-Se)[N(TMS)2]2' 
; 
_chemical_name_common             'Fe2(mu-NHtBu)(mu-Se)[N(TMS)2]2'
_chemical_melting_point           ? 
_chemical_formula_moiety          
 '(Fe 3+)2 (C4H10N -)2 (Se 2-) (C6H18NSi2 1-)2' 
_chemical_formula_sum 
 'C20 H56 Fe2 N4 Se Si4' 
_chemical_formula_weight          655.71 
 
loop_ 
 _atom_type_symbol 
 _atom_type_description 
 _atom_type_scat_dispersion_real 
 _atom_type_scat_dispersion_imag 
 _atom_type_scat_source 
 'C'  'C'   0.0033   0.0016 
 'International Tables Vol C Tables 4.2.6.8 and 6.1.1.4' 
 'H'  'H'   0.0000   0.0000 
 'International Tables Vol C Tables 4.2.6.8 and 6.1.1.4' 
 'N'  'N'   0.0061   0.0033 
 'International Tables Vol C Tables 4.2.6.8 and 6.1.1.4' 
 'Si'  'Si'   0.0817   0.0704 
 'International Tables Vol C Tables 4.2.6.8 and 6.1.1.4' 
 'Fe'  'Fe'   0.3463   0.8444 
 'International Tables Vol C Tables 4.2.6.8 and 6.1.1.4' 
 'Se'  'Se'  -0.0929   2.2259 
 'International Tables Vol C Tables 4.2.6.8 and 6.1.1.4' 
 
_symmetry_cell_setting            Monoclinic
_symmetry_space_group_name_H-M    P2(1)/n
 
loop_ 
 _symmetry_equiv_pos_as_xyz 
 'x, y, z' 
 '-x+1/2, y+1/2, -z+1/2' 
 '-x, -y, -z' 
 'x-1/2, -y-1/2, z-1/2' 
 
_cell_length_a                    16.4943(6) 
_cell_length_b                    9.0935(3) 
_cell_length_c                    23.5967(8) 
_cell_angle_alpha                 90.00 
_cell_angle_beta                  101.6310(10) 
_cell_angle_gamma                 90.00 
_cell_volume                      3466.6(2) 
_cell_formula_units_Z             4 
_cell_measurement_temperature     200(2) 
_cell_measurement_reflns_used     9963 
_cell_measurement_theta_min       2.97
_cell_measurement_theta_max       29.78
 
_exptl_crystal_description        block
_exptl_crystal_colour             black
_exptl_crystal_size_max           0.38 
_exptl_crystal_size_mid           0.18 
_exptl_crystal_size_min           0.10 
_exptl_crystal_density_meas       ? 
_exptl_crystal_density_diffrn     1.256 
_exptl_crystal_density_method     'not measured' 
_exptl_crystal_F_000              1384 
_exptl_absorpt_coefficient_mu     2.039 
_exptl_absorpt_correction_type    empirical
_exptl_absorpt_correction_T_min   0.5112 
_exptl_absorpt_correction_T_max   0.8221 
_exptl_absorpt_process_details    APEXII
 
_exptl_special_details 
; 
 ? 
; 
 
_diffrn_ambient_temperature       200(2) 
_diffrn_radiation_wavelength      0.71073 
_diffrn_radiation_type            MoK\a 
_diffrn_radiation_source          'fine-focus sealed tube' 
_diffrn_radiation_monochromator   graphite 
_diffrn_measurement_device_type   ? 
_diffrn_measurement_method        ? 
_diffrn_detector_area_resol_mean  ? 
_diffrn_standards_number          ? 
_diffrn_standards_interval_count  ? 
_diffrn_standards_interval_time   ? 
_diffrn_standards_decay_%         ? 
_diffrn_reflns_number             38823 
_diffrn_reflns_av_R_equivalents   0.0301 
_diffrn_reflns_av_sigmaI/netI     0.0284 
_diffrn_reflns_limit_h_min        -23 
_diffrn_reflns_limit_h_max        23 
_diffrn_reflns_limit_k_min        -12 
_diffrn_reflns_limit_k_max        12 
_diffrn_reflns_limit_l_min        -33 
_diffrn_reflns_limit_l_max        33 
_diffrn_reflns_theta_min          2.97 
_diffrn_reflns_theta_max          30.05 
_reflns_number_total              10145 
_reflns_number_gt                 8091 
_reflns_threshold_expression      >2sigma(I) 
 
_computing_data_collection        ? 
_computing_cell_refinement        ? 
_computing_data_reduction         ? 
_computing_structure_solution     'SHELXS-97 (Sheldrick, 1990)' 
_computing_structure_refinement   'SHELXL-97 (Sheldrick, 1997)' 
_computing_molecular_graphics     ? 
_computing_publication_material   ? 
 
_refine_special_details 
; 
 Refinement of F^2^ against ALL reflections.  The weighted R-factor wR and 
 goodness of fit S are based on F^2^, conventional R-factors R are based 
 on F, with F set to zero for negative F^2^. The threshold expression of 
 F^2^ > 2sigma(F^2^) is used only for calculating R-factors(gt) etc. and is 
 not relevant to the choice of reflections for refinement.  R-factors based 
 on F^2^ are statistically about twice as large as those based on F, and R- 
 factors based on ALL data will be even larger. 
; 
 
_refine_ls_structure_factor_coef  Fsqd  
_refine_ls_matrix_type            full 
_refine_ls_weighting_scheme       calc  
_refine_ls_weighting_details 
 'calc w=1/[\s^2^(Fo^2^)+(0.0303P)^2^+1.5250P] where P=(Fo^2^+2Fc^2^)/3' 
_atom_sites_solution_primary      direct 
_atom_sites_solution_secondary    difmap 
_atom_sites_solution_hydrogens    geom 
_refine_ls_hydrogen_treatment     mixed 
_refine_ls_extinction_method      none 
_refine_ls_extinction_coef        ? 
_refine_ls_number_reflns          10145 
_refine_ls_number_parameters      288 
_refine_ls_number_restraints      0 
_refine_ls_R_factor_all           0.0442 
_refine_ls_R_factor_gt            0.0311 
_refine_ls_wR_factor_ref          0.0765 
_refine_ls_wR_factor_gt           0.0704 
_refine_ls_goodness_of_fit_ref    1.032 
_refine_ls_restrained_S_all       1.032 
_refine_ls_shift/su_max           0.001 
_refine_ls_shift/su_mean          0.000 
 
loop_ 
 _atom_site_label 
 _atom_site_type_symbol 
 _atom_site_fract_x 
 _atom_site_fract_y 
 _atom_site_fract_z 
 _atom_site_U_iso_or_equiv 
 _atom_site_adp_type 
 _atom_site_occupancy 
 _atom_site_symmetry_multiplicity 
 _atom_site_calc_flag 
 _atom_site_refinement_flags 
 _atom_site_disorder_assembly 
 _atom_site_disorder_group 
Se1 Se 0.431485(12) 0.31096(2) 0.226662(9) 0.03350(5) Uani 1 1 d . . . 
Fe1 Fe 0.462418(15) 0.55212(3) 0.199270(10) 0.02463(6) Uani 1 1 d . . . 
Fe2 Fe 0.527053(15) 0.44704(3) 0.294694(10) 0.02475(6) Uani 1 1 d . . . 
Si2 Si 0.44171(4) 0.82370(6) 0.11775(3) 0.03846(13) Uani 1 1 d . . . 
Si1 Si 0.35753(4) 0.53246(7) 0.07461(2) 0.03827(13) Uani 1 1 d . . . 
Si3 Si 0.54763(4) 0.20441(7) 0.38857(3) 0.04291(14) Uani 1 1 d . . . 
Si4 Si 0.64896(3) 0.48832(7) 0.41313(2) 0.03342(12) Uani 1 1 d . . . 
N1 N 0.45998(9) 0.63789(17) 0.27888(6) 0.0262(3) Uani 1 1 d . . . 
N3 N 0.41955(10) 0.63979(18) 0.12708(6) 0.0304(3) Uani 1 1 d . . . 
N2 N 0.58689(9) 0.52890(17) 0.23317(7) 0.0261(3) Uani 1 1 d . . . 
N4 N 0.57680(10) 0.37817(17) 0.36913(7) 0.0313(3) Uani 1 1 d . . . 
C1 C 0.38623(12) 0.6834(2) 0.30269(9) 0.0351(4) Uani 1 1 d . . . 
C2 C 0.31641(18) 0.5786(4) 0.28496(19) 0.0993(14) Uani 1 1 d . . . 
H2A H 0.3335 0.4803 0.2997 0.149 Uiso 1 1 calc R . . 
H2B H 0.3009 0.5756 0.2426 0.149 Uiso 1 1 calc R . . 
H2C H 0.2689 0.6110 0.3009 0.149 Uiso 1 1 calc R . . 
C3 C 0.4109(2) 0.6919(4) 0.36800(12) 0.0829(11) Uani 1 1 d . . . 
H3A H 0.4283 0.5943 0.3835 0.124 Uiso 1 1 calc R . . 
H3B H 0.3636 0.7253 0.3839 0.124 Uiso 1 1 calc R . . 
H3C H 0.4569 0.7613 0.3788 0.124 Uiso 1 1 calc R . . 
C4 C 0.35925(19) 0.8357(3) 0.27946(14) 0.0724(9) Uani 1 1 d . . . 
H4A H 0.3429 0.8317 0.2372 0.109 Uiso 1 1 calc R . . 
H4B H 0.4053 0.9048 0.2905 0.109 Uiso 1 1 calc R . . 
H4C H 0.3122 0.8686 0.2958 0.109 Uiso 1 1 calc R . . 
C5 C 0.65028(11) 0.4582(2) 0.20461(9) 0.0331(4) Uani 1 1 d . . . 
C6 C 0.73176(13) 0.4465(3) 0.24820(11) 0.0551(6) Uani 1 1 d . . . 
H6A H 0.7239 0.3856 0.2809 0.083 Uiso 1 1 calc R . . 
H6B H 0.7501 0.5449 0.2621 0.083 Uiso 1 1 calc R . . 
H6C H 0.7737 0.4014 0.2296 0.083 Uiso 1 1 calc R . . 
C7 C 0.66160(17) 0.5529(3) 0.15345(11) 0.0581(7) Uani 1 1 d . . . 
H7A H 0.6090 0.5596 0.1256 0.087 Uiso 1 1 calc R . . 
H7B H 0.7035 0.5083 0.1347 0.087 Uiso 1 1 calc R . . 
H7C H 0.6796 0.6517 0.1672 0.087 Uiso 1 1 calc R . . 
C8 C 0.62252(15) 0.3059(3) 0.18314(13) 0.0561(7) Uani 1 1 d . . . 
H8A H 0.5702 0.3129 0.1550 0.084 Uiso 1 1 calc R . . 
H8B H 0.6147 0.2449 0.2159 0.084 Uiso 1 1 calc R . . 
H8C H 0.6647 0.2613 0.1647 0.084 Uiso 1 1 calc R . . 
C9 C 0.41714(19) 0.3736(4) 0.05465(13) 0.0751(9) Uani 1 1 d . . . 
H9A H 0.4394 0.3157 0.0893 0.113 Uiso 1 1 calc R . . 
H9B H 0.4629 0.4097 0.0376 0.113 Uiso 1 1 calc R . . 
H9C H 0.3806 0.3117 0.0265 0.113 Uiso 1 1 calc R . . 
C10 C 0.3171(2) 0.6333(4) 0.00572(12) 0.0908(11) Uani 1 1 d . . . 
H10A H 0.2850 0.7189 0.0137 0.136 Uiso 1 1 calc R . . 
H10B H 0.2815 0.5678 -0.0215 0.136 Uiso 1 1 calc R . . 
H10C H 0.3636 0.6663 -0.0112 0.136 Uiso 1 1 calc R . . 
C11 C 0.26734(17) 0.4594(5) 0.10121(12) 0.0898(13) Uani 1 1 d . . . 
H11A H 0.2866 0.4051 0.1373 0.135 Uiso 1 1 calc R . . 
H11B H 0.2357 0.3932 0.0721 0.135 Uiso 1 1 calc R . . 
H11C H 0.2319 0.5410 0.1083 0.135 Uiso 1 1 calc R . . 
C12 C 0.4913(2) 0.8529(3) 0.05417(12) 0.0711(8) Uani 1 1 d . . . 
H12A H 0.5411 0.7919 0.0583 0.107 Uiso 1 1 calc R . . 
H12B H 0.5065 0.9567 0.0522 0.107 Uiso 1 1 calc R . . 
H12C H 0.4524 0.8256 0.0186 0.107 Uiso 1 1 calc R . . 
C13 C 0.34649(19) 0.9409(3) 0.10964(13) 0.0680(8) Uani 1 1 d . . . 
H13A H 0.3050 0.9060 0.0767 0.102 Uiso 1 1 calc R . . 
H13B H 0.3607 1.0433 0.1031 0.102 Uiso 1 1 calc R . . 
H13C H 0.3240 0.9347 0.1450 0.102 Uiso 1 1 calc R . . 
C14 C 0.51791(16) 0.8966(2) 0.18098(11) 0.0514(6) Uani 1 1 d . . . 
H14A H 0.5687 0.8379 0.1865 0.077 Uiso 1 1 calc R . . 
H14B H 0.4942 0.8909 0.2158 0.077 Uiso 1 1 calc R . . 
H14C H 0.5308 0.9993 0.1738 0.077 Uiso 1 1 calc R . . 
C15 C 0.57967(17) 0.0640(3) 0.33972(14) 0.0642(8) Uani 1 1 d . . . 
H15A H 0.5553 0.0883 0.2994 0.096 Uiso 1 1 calc R . . 
H15B H 0.5604 -0.0332 0.3491 0.096 Uiso 1 1 calc R . . 
H15C H 0.6401 0.0634 0.3450 0.096 Uiso 1 1 calc R . . 
C16 C 0.5965(3) 0.1517(4) 0.46461(14) 0.1072(15) Uani 1 1 d . . . 
H16A H 0.5809 0.2233 0.4916 0.161 Uiso 1 1 calc R . . 
H16B H 0.6568 0.1505 0.4689 0.161 Uiso 1 1 calc R . . 
H16C H 0.5772 0.0537 0.4731 0.161 Uiso 1 1 calc R . . 
C17 C 0.43407(17) 0.1924(3) 0.38484(12) 0.0596(7) Uani 1 1 d . . . 
H17A H 0.4046 0.2185 0.3458 0.089 Uiso 1 1 calc R . . 
H17B H 0.4183 0.2605 0.4129 0.089 Uiso 1 1 calc R . . 
H17C H 0.4195 0.0918 0.3939 0.089 Uiso 1 1 calc R . . 
C18 C 0.66282(15) 0.6652(2) 0.37643(10) 0.0474(5) Uani 1 1 d . . . 
H18A H 0.6798 0.6450 0.3397 0.071 Uiso 1 1 calc R . . 
H18B H 0.7055 0.7240 0.4013 0.071 Uiso 1 1 calc R . . 
H18C H 0.6104 0.7195 0.3689 0.071 Uiso 1 1 calc R . . 
C19 C 0.75367(15) 0.4010(3) 0.43047(12) 0.0632(7) Uani 1 1 d . . . 
H19A H 0.7710 0.3743 0.3945 0.095 Uiso 1 1 calc R . . 
H19B H 0.7514 0.3124 0.4537 0.095 Uiso 1 1 calc R . . 
H19C H 0.7935 0.4705 0.4523 0.095 Uiso 1 1 calc R . . 
C20 C 0.61666(17) 0.5384(3) 0.48217(10) 0.0598(7) Uani 1 1 d . . . 
H20A H 0.5618 0.5845 0.4734 0.090 Uiso 1 1 calc R . . 
H20B H 0.6568 0.6075 0.5040 0.090 Uiso 1 1 calc R . . 
H20C H 0.6145 0.4495 0.5053 0.090 Uiso 1 1 calc R . . 
H1 H 0.4931(12) 0.709(2) 0.2862(9) 0.027(5) Uiso 1 1 d . . . 
H2 H 0.6058(13) 0.609(3) 0.2450(9) 0.033(6) Uiso 1 1 d . . . 
 
loop_ 
 _atom_site_aniso_label 
 _atom_site_aniso_U_11 
 _atom_site_aniso_U_22 
 _atom_site_aniso_U_33 
 _atom_site_aniso_U_23 
 _atom_site_aniso_U_13 
 _atom_site_aniso_U_12 
Se1 0.03623(10) 0.02904(10) 0.03246(10) -0.00110(8) 0.00028(8) -0.00784(8) 
Fe1 0.02473(12) 0.02664(13) 0.02124(12) 0.00091(9) 0.00158(9) 0.00166(9) 
Fe2 0.02510(12) 0.02502(12) 0.02251(12) 0.00171(9) 0.00094(9) 0.00053(9) 
Si2 0.0499(3) 0.0332(3) 0.0322(3) 0.0087(2) 0.0081(3) 0.0051(2) 
Si1 0.0349(3) 0.0533(4) 0.0237(3) 0.0006(2) -0.0010(2) -0.0057(3) 
Si3 0.0539(4) 0.0339(3) 0.0370(3) 0.0114(2) 0.0000(3) -0.0032(3) 
Si4 0.0297(3) 0.0404(3) 0.0268(3) -0.0030(2) -0.0024(2) 0.0008(2) 
N1 0.0250(7) 0.0267(7) 0.0269(8) -0.0013(6) 0.0048(6) 0.0018(6) 
N3 0.0336(8) 0.0332(8) 0.0223(7) 0.0028(6) 0.0007(6) 0.0017(6) 
N2 0.0251(7) 0.0248(7) 0.0278(8) -0.0021(6) 0.0038(6) -0.0003(6) 
N4 0.0351(8) 0.0304(8) 0.0248(7) 0.0044(6) -0.0024(6) -0.0017(6) 
C1 0.0333(9) 0.0406(11) 0.0335(10) 0.0003(8) 0.0114(8) 0.0090(8) 
C2 0.0501(17) 0.098(3) 0.165(4) -0.055(3) 0.059(2) -0.0190(16) 
C3 0.078(2) 0.136(3) 0.0405(14) 0.0071(17) 0.0241(14) 0.051(2) 
C4 0.0742(19) 0.0703(19) 0.083(2) 0.0215(16) 0.0392(17) 0.0428(16) 
C5 0.0270(9) 0.0382(10) 0.0348(10) -0.0004(8) 0.0081(8) 0.0040(8) 
C6 0.0290(11) 0.0795(19) 0.0549(15) -0.0058(13) 0.0040(10) 0.0126(11) 
C7 0.0608(15) 0.0697(18) 0.0526(15) 0.0135(13) 0.0324(13) 0.0138(13) 
C8 0.0443(13) 0.0483(14) 0.0798(19) -0.0241(13) 0.0224(13) 0.0042(11) 
C9 0.075(2) 0.076(2) 0.0673(19) -0.0393(16) 0.0000(16) -0.0014(16) 
C10 0.120(3) 0.091(2) 0.0411(16) 0.0125(15) -0.0320(17) -0.011(2) 
C11 0.0426(14) 0.175(4) 0.0482(16) -0.0026(19) 0.0005(12) -0.0435(19) 
C12 0.097(2) 0.0710(19) 0.0525(16) 0.0160(14) 0.0312(16) -0.0128(17) 
C13 0.081(2) 0.0538(16) 0.0653(18) 0.0116(13) 0.0047(15) 0.0301(14) 
C14 0.0666(16) 0.0324(11) 0.0529(14) 0.0032(10) 0.0065(12) -0.0110(11) 
C15 0.0634(16) 0.0321(12) 0.098(2) 0.0053(13) 0.0182(16) 0.0080(11) 
C16 0.156(4) 0.082(2) 0.061(2) 0.0434(18) -0.032(2) -0.032(2) 
C17 0.0692(17) 0.0529(15) 0.0646(17) 0.0033(12) 0.0323(14) -0.0126(13) 
C18 0.0489(13) 0.0425(12) 0.0450(13) -0.0057(10) -0.0043(10) -0.0157(10) 
C19 0.0416(13) 0.0788(19) 0.0605(17) -0.0049(14) -0.0103(12) 0.0162(13) 
C20 0.0590(15) 0.083(2) 0.0372(12) -0.0155(12) 0.0086(11) -0.0112(14) 
 
_geom_special_details 
; 
 All esds (except the esd in the dihedral angle between two l.s. planes) 
 are estimated using the full covariance matrix.  The cell esds are taken 
 into account individually in the estimation of esds in distances, angles 
 and torsion angles; correlations between esds in cell parameters are only 
 used when they are defined by crystal symmetry.  An approximate (isotropic) 
 treatment of cell esds is used for estimating esds involving l.s. planes. 
; 
 
loop_ 
 _geom_bond_atom_site_label_1 
 _geom_bond_atom_site_label_2 
 _geom_bond_distance 
 _geom_bond_site_symmetry_2 
 _geom_bond_publ_flag 
Se1 Fe2 2.3607(3) . ? 
Se1 Fe1 2.3707(3) . ? 
Se1 N1 3.2162(16) . ? 
Se1 N2 3.2192(15) . ? 
Fe1 N3 1.8845(15) . ? 
Fe1 N1 2.0420(15) . ? 
Fe1 N2 2.0585(15) . ? 
Fe1 Fe2 2.4803(4) . ? 
Fe2 N4 1.8893(15) . ? 
Fe2 N1 2.0515(15) . ? 
Fe2 N2 2.0527(15) . ? 
Si2 N3 1.7353(17) . ? 
Si2 C12 1.867(3) . ? 
Si2 C14 1.868(2) . ? 
Si2 C13 1.876(3) . ? 
Si1 N3 1.7382(17) . ? 
Si1 C11 1.851(3) . ? 
Si1 C9 1.861(3) . ? 
Si1 C10 1.868(3) . ? 
Si3 N4 1.7400(17) . ? 
Si3 C17 1.861(3) . ? 
Si3 C15 1.866(3) . ? 
Si3 C16 1.875(3) . ? 
Si4 N4 1.7320(16) . ? 
Si4 C18 1.862(2) . ? 
Si4 C20 1.869(2) . ? 
Si4 C19 1.870(2) . ? 
N1 C1 1.497(2) . ? 
N2 C5 1.498(2) . ? 
C1 C2 1.488(4) . ? 
C1 C3 1.514(3) . ? 
C1 C4 1.522(3) . ? 
C5 C8 1.514(3) . ? 
C5 C6 1.523(3) . ? 
C5 C7 1.525(3) . ? 
 
loop_ 
 _geom_angle_atom_site_label_1 
 _geom_angle_atom_site_label_2 
 _geom_angle_atom_site_label_3 
 _geom_angle 
 _geom_angle_site_symmetry_1 
 _geom_angle_site_symmetry_3 
 _geom_angle_publ_flag 
Fe2 Se1 Fe1 63.231(10) . . ? 
Fe2 Se1 N1 39.55(3) . . ? 
Fe1 Se1 N1 39.34(3) . . ? 
Fe2 Se1 N2 39.53(3) . . ? 
Fe1 Se1 N2 39.69(3) . . ? 
N1 Se1 N2 50.15(4) . . ? 
N3 Fe1 N1 126.62(7) . . ? 
N3 Fe1 N2 123.90(7) . . ? 
N1 Fe1 N2 83.38(6) . . ? 
N3 Fe1 Se1 125.14(5) . . ? 
N1 Fe1 Se1 93.28(5) . . ? 
N2 Fe1 Se1 92.97(4) . . ? 
N3 Fe1 Fe2 176.22(5) . . ? 
N1 Fe1 Fe2 52.88(4) . . ? 
N2 Fe1 Fe2 52.79(4) . . ? 
Se1 Fe1 Fe2 58.188(9) . . ? 
N4 Fe2 N1 124.52(7) . . ? 
N4 Fe2 N2 126.66(7) . . ? 
N1 Fe2 N2 83.29(6) . . ? 
N4 Fe2 Se1 124.31(5) . . ? 
N1 Fe2 Se1 93.33(5) . . ? 
N2 Fe2 Se1 93.41(4) . . ? 
N4 Fe2 Fe1 176.69(5) . . ? 
N1 Fe2 Fe1 52.53(4) . . ? 
N2 Fe2 Fe1 53.00(4) . . ? 
Se1 Fe2 Fe1 58.581(10) . . ? 
N3 Si2 C12 112.15(12) . . ? 
N3 Si2 C14 111.44(9) . . ? 
C12 Si2 C14 104.94(13) . . ? 
N3 Si2 C13 111.54(12) . . ? 
C12 Si2 C13 109.32(14) . . ? 
C14 Si2 C13 107.13(13) . . ? 
N3 Si1 C11 110.98(11) . . ? 
N3 Si1 C9 110.55(11) . . ? 
C11 Si1 C9 107.99(18) . . ? 
N3 Si1 C10 113.55(12) . . ? 
C11 Si1 C10 107.53(16) . . ? 
C9 Si1 C10 105.97(16) . . ? 
N4 Si3 C17 111.73(10) . . ? 
N4 Si3 C15 109.30(10) . . ? 
C17 Si3 C15 109.77(13) . . ? 
N4 Si3 C16 113.35(12) . . ? 
C17 Si3 C16 105.33(17) . . ? 
C15 Si3 C16 107.20(17) . . ? 
N4 Si4 C18 110.77(9) . . ? 
N4 Si4 C20 112.41(10) . . ? 
C18 Si4 C20 106.14(12) . . ? 
N4 Si4 C19 112.24(11) . . ? 
C18 Si4 C19 105.89(13) . . ? 
C20 Si4 C19 109.02(13) . . ? 
C1 N1 Fe1 128.23(12) . . ? 
C1 N1 Fe2 127.93(12) . . ? 
Fe1 N1 Fe2 74.59(5) . . ? 
C1 N1 Se1 109.40(11) . . ? 
Fe1 N1 Se1 47.38(3) . . ? 
Fe2 N1 Se1 47.12(3) . . ? 
Si2 N3 Si1 124.02(9) . . ? 
Si2 N3 Fe1 118.18(9) . . ? 
Si1 N3 Fe1 117.78(9) . . ? 
C5 N2 Fe2 129.89(12) . . ? 
C5 N2 Fe1 126.94(12) . . ? 
Fe2 N2 Fe1 74.21(5) . . ? 
C5 N2 Se1 109.61(11) . . ? 
Fe2 N2 Se1 47.06(3) . . ? 
Fe1 N2 Se1 47.34(3) . . ? 
Si4 N4 Si3 124.07(9) . . ? 
Si4 N4 Fe2 118.87(9) . . ? 
Si3 N4 Fe2 117.05(9) . . ? 
C2 C1 N1 111.03(18) . . ? 
C2 C1 C3 110.7(3) . . ? 
N1 C1 C3 108.87(17) . . ? 
C2 C1 C4 109.1(2) . . ? 
N1 C1 C4 108.48(17) . . ? 
C3 C1 C4 108.6(2) . . ? 
N2 C5 C8 110.59(16) . . ? 
N2 C5 C6 109.10(17) . . ? 
C8 C5 C6 109.14(19) . . ? 
N2 C5 C7 108.79(16) . . ? 
C8 C5 C7 109.2(2) . . ? 
C6 C5 C7 110.01(19) . . ? 
 
loop_ 
 _geom_torsion_atom_site_label_1 
 _geom_torsion_atom_site_label_2 
 _geom_torsion_atom_site_label_3 
 _geom_torsion_atom_site_label_4 
 _geom_torsion 
 _geom_torsion_site_symmetry_1 
 _geom_torsion_site_symmetry_2 
 _geom_torsion_site_symmetry_3 
 _geom_torsion_site_symmetry_4 
 _geom_torsion_publ_flag 
Fe2 Se1 Fe1 N3 177.87(6) . . . . ? 
N1 Se1 Fe1 N3 -140.46(7) . . . . ? 
N2 Se1 Fe1 N3 136.01(7) . . . . ? 
Fe2 Se1 Fe1 N1 -41.68(4) . . . . ? 
N2 Se1 Fe1 N1 -83.53(6) . . . . ? 
Fe2 Se1 Fe1 N2 41.86(4) . . . . ? 
N1 Se1 Fe1 N2 83.53(6) . . . . ? 
N1 Se1 Fe1 Fe2 41.68(4) . . . . ? 
N2 Se1 Fe1 Fe2 -41.86(4) . . . . ? 
Fe1 Se1 Fe2 N4 178.08(6) . . . . ? 
N1 Se1 Fe2 N4 136.64(8) . . . . ? 
N2 Se1 Fe2 N4 -139.90(8) . . . . ? 
Fe1 Se1 Fe2 N1 41.44(4) . . . . ? 
N2 Se1 Fe2 N1 83.47(6) . . . . ? 
Fe1 Se1 Fe2 N2 -42.02(4) . . . . ? 
N1 Se1 Fe2 N2 -83.47(6) . . . . ? 
N1 Se1 Fe2 Fe1 -41.44(4) . . . . ? 
N2 Se1 Fe2 Fe1 42.02(4) . . . . ? 
N3 Fe1 Fe2 N4 56.1(12) . . . . ? 
N1 Fe1 Fe2 N4 -27.8(9) . . . . ? 
N2 Fe1 Fe2 N4 85.4(9) . . . . ? 
Se1 Fe1 Fe2 N4 -151.4(9) . . . . ? 
N3 Fe1 Fe2 N1 83.9(8) . . . . ? 
N2 Fe1 Fe2 N1 113.16(8) . . . . ? 
Se1 Fe1 Fe2 N1 -123.64(6) . . . . ? 
N3 Fe1 Fe2 N2 -29.3(8) . . . . ? 
N1 Fe1 Fe2 N2 -113.16(8) . . . . ? 
Se1 Fe1 Fe2 N2 123.20(6) . . . . ? 
N3 Fe1 Fe2 Se1 -152.5(8) . . . . ? 
N1 Fe1 Fe2 Se1 123.64(6) . . . . ? 
N2 Fe1 Fe2 Se1 -123.20(6) . . . . ? 
N3 Fe1 N1 C1 58.20(18) . . . . ? 
N2 Fe1 N1 C1 -173.97(16) . . . . ? 
Se1 Fe1 N1 C1 -81.36(15) . . . . ? 
Fe2 Fe1 N1 C1 -126.48(17) . . . . ? 
N3 Fe1 N1 Fe2 -175.32(6) . . . . ? 
N2 Fe1 N1 Fe2 -47.49(5) . . . . ? 
Se1 Fe1 N1 Fe2 45.12(4) . . . . ? 
N3 Fe1 N1 Se1 139.56(7) . . . . ? 
N2 Fe1 N1 Se1 -92.61(4) . . . . ? 
Fe2 Fe1 N1 Se1 -45.12(4) . . . . ? 
N4 Fe2 N1 C1 -55.07(18) . . . . ? 
N2 Fe2 N1 C1 174.48(16) . . . . ? 
Se1 Fe2 N1 C1 81.43(15) . . . . ? 
Fe1 Fe2 N1 C1 126.80(17) . . . . ? 
N4 Fe2 N1 Fe1 178.13(6) . . . . ? 
N2 Fe2 N1 Fe1 47.68(5) . . . . ? 
Se1 Fe2 N1 Fe1 -45.37(4) . . . . ? 
N4 Fe2 N1 Se1 -136.50(7) . . . . ? 
N2 Fe2 N1 Se1 93.05(4) . . . . ? 
Fe1 Fe2 N1 Se1 45.37(4) . . . . ? 
Fe2 Se1 N1 C1 -124.22(12) . . . . ? 
Fe1 Se1 N1 C1 124.58(12) . . . . ? 
N2 Se1 N1 C1 -179.67(13) . . . . ? 
Fe2 Se1 N1 Fe1 111.20(5) . . . . ? 
N2 Se1 N1 Fe1 55.74(5) . . . . ? 
Fe1 Se1 N1 Fe2 -111.20(5) . . . . ? 
N2 Se1 N1 Fe2 -55.46(4) . . . . ? 
C12 Si2 N3 Si1 -57.47(16) . . . . ? 
C14 Si2 N3 Si1 -174.79(12) . . . . ? 
C13 Si2 N3 Si1 65.53(15) . . . . ? 
C12 Si2 N3 Fe1 124.55(13) . . . . ? 
C14 Si2 N3 Fe1 7.23(14) . . . . ? 
C13 Si2 N3 Fe1 -112.45(13) . . . . ? 
C11 Si1 N3 Si2 -120.54(17) . . . . ? 
C9 Si1 N3 Si2 119.66(15) . . . . ? 
C10 Si1 N3 Si2 0.7(2) . . . . ? 
C11 Si1 N3 Fe1 57.45(17) . . . . ? 
C9 Si1 N3 Fe1 -62.35(16) . . . . ? 
C10 Si1 N3 Fe1 178.71(15) . . . . ? 
N1 Fe1 N3 Si2 46.24(13) . . . . ? 
N2 Fe1 N3 Si2 -62.81(12) . . . . ? 
Se1 Fe1 N3 Si2 173.87(6) . . . . ? 
Fe2 Fe1 N3 Si2 -34.8(8) . . . . ? 
N1 Fe1 N3 Si1 -131.86(9) . . . . ? 
N2 Fe1 N3 Si1 119.08(9) . . . . ? 
Se1 Fe1 N3 Si1 -4.24(12) . . . . ? 
Fe2 Fe1 N3 Si1 147.1(7) . . . . ? 
N4 Fe2 N2 C5 58.84(18) . . . . ? 
N1 Fe2 N2 C5 -172.57(16) . . . . ? 
Se1 Fe2 N2 C5 -79.61(15) . . . . ? 
Fe1 Fe2 N2 C5 -125.28(17) . . . . ? 
N4 Fe2 N2 Fe1 -175.88(6) . . . . ? 
N1 Fe2 N2 Fe1 -47.29(5) . . . . ? 
Se1 Fe2 N2 Fe1 45.67(4) . . . . ? 
N4 Fe2 N2 Se1 138.45(7) . . . . ? 
N1 Fe2 N2 Se1 -92.96(5) . . . . ? 
Fe1 Fe2 N2 Se1 -45.67(4) . . . . ? 
N3 Fe1 N2 C5 -53.82(17) . . . . ? 
N1 Fe1 N2 C5 175.97(15) . . . . ? 
Se1 Fe1 N2 C5 83.01(14) . . . . ? 
Fe2 Fe1 N2 C5 128.40(16) . . . . ? 
N3 Fe1 N2 Fe2 177.78(6) . . . . ? 
N1 Fe1 N2 Fe2 47.57(5) . . . . ? 
Se1 Fe1 N2 Fe2 -45.40(4) . . . . ? 
N3 Fe1 N2 Se1 -136.83(7) . . . . ? 
N1 Fe1 N2 Se1 92.96(5) . . . . ? 
Fe2 Fe1 N2 Se1 45.40(4) . . . . ? 
Fe2 Se1 N2 C5 126.75(13) . . . . ? 
Fe1 Se1 N2 C5 -122.63(12) . . . . ? 
N1 Se1 N2 C5 -177.75(13) . . . . ? 
Fe1 Se1 N2 Fe2 110.62(5) . . . . ? 
N1 Se1 N2 Fe2 55.49(4) . . . . ? 
Fe2 Se1 N2 Fe1 -110.62(5) . . . . ? 
N1 Se1 N2 Fe1 -55.12(4) . . . . ? 
C18 Si4 N4 Si3 179.87(12) . . . . ? 
C20 Si4 N4 Si3 -61.58(16) . . . . ? 
C19 Si4 N4 Si3 61.75(16) . . . . ? 
C18 Si4 N4 Fe2 0.94(14) . . . . ? 
C20 Si4 N4 Fe2 119.49(13) . . . . ? 
C19 Si4 N4 Fe2 -117.19(13) . . . . ? 
C17 Si3 N4 Si4 122.95(14) . . . . ? 
C15 Si3 N4 Si4 -115.36(14) . . . . ? 
C16 Si3 N4 Si4 4.1(2) . . . . ? 
C17 Si3 N4 Fe2 -58.10(14) . . . . ? 
C15 Si3 N4 Fe2 63.60(14) . . . . ? 
C16 Si3 N4 Fe2 -176.91(18) . . . . ? 
N1 Fe2 N4 Si4 -58.81(13) . . . . ? 
N2 Fe2 N4 Si4 50.77(13) . . . . ? 
Se1 Fe2 N4 Si4 177.49(6) . . . . ? 
Fe1 Fe2 N4 Si4 -32.1(10) . . . . ? 
N1 Fe2 N4 Si3 122.18(9) . . . . ? 
N2 Fe2 N4 Si3 -128.24(9) . . . . ? 
Se1 Fe2 N4 Si3 -1.52(12) . . . . ? 
Fe1 Fe2 N4 Si3 148.9(8) . . . . ? 
Fe1 N1 C1 C2 39.3(3) . . . . ? 
Fe2 N1 C1 C2 -61.4(3) . . . . ? 
Se1 N1 C1 C2 -11.2(3) . . . . ? 
Fe1 N1 C1 C3 161.34(19) . . . . ? 
Fe2 N1 C1 C3 60.7(3) . . . . ? 
Se1 N1 C1 C3 110.9(2) . . . . ? 
Fe1 N1 C1 C4 -80.6(2) . . . . ? 
Fe2 N1 C1 C4 178.72(17) . . . . ? 
Se1 N1 C1 C4 -131.09(18) . . . . ? 
Fe2 N2 C5 C8 48.4(2) . . . . ? 
Fe1 N2 C5 C8 -52.2(2) . . . . ? 
Se1 N2 C5 C8 -1.4(2) . . . . ? 
Fe2 N2 C5 C6 -71.6(2) . . . . ? 
Fe1 N2 C5 C6 -172.29(15) . . . . ? 
Se1 N2 C5 C6 -121.50(15) . . . . ? 
Fe2 N2 C5 C7 168.33(16) . . . . ? 
Fe1 N2 C5 C7 67.7(2) . . . . ? 
Se1 N2 C5 C7 118.48(16) . . . . ? 
 
_diffrn_measured_fraction_theta_max    0.998 
_diffrn_reflns_theta_full              30.05 
_diffrn_measured_fraction_theta_full   0.998 
_refine_diff_density_max    0.572 
_refine_diff_density_min   -0.406 
_refine_diff_density_rms    0.061 

#===END

 
data_sl17 
 
_audit_creation_method            SHELXL-97 
_chemical_name_systematic 
; 
 (Et4N)[Fe4(mu3-NtBu)3(mu3-S)Cl4] 
; 
_chemical_name_common              
; 
 (Et4N)[Fe4(mu3-NtBu)3(mu3-S)Cl4] 
; 
_chemical_melting_point           ? 
_chemical_formula_moiety          
;
(Et4N +) [ (Fe 3+)3 (Fe 2+) (NtBu 2-)3 (S 2-) (Cl -)4 ]
; 
_chemical_formula_sum 
 'C20 H47 Cl4 Fe4 N4 S' 
_chemical_formula_weight          740.88 
 
loop_ 
 _atom_type_symbol 
 _atom_type_description 
 _atom_type_scat_dispersion_real 
 _atom_type_scat_dispersion_imag 
 _atom_type_scat_source 
 'C'  'C'   0.0033   0.0016 
 'International Tables Vol C Tables 4.2.6.8 and 6.1.1.4' 
 'H'  'H'   0.0000   0.0000 
 'International Tables Vol C Tables 4.2.6.8 and 6.1.1.4' 
 'N'  'N'   0.0061   0.0033 
 'International Tables Vol C Tables 4.2.6.8 and 6.1.1.4' 
 'S'  'S'   0.1246   0.1234 
 'International Tables Vol C Tables 4.2.6.8 and 6.1.1.4' 
 'Cl'  'Cl'   0.1484   0.1585 
 'International Tables Vol C Tables 4.2.6.8 and 6.1.1.4' 
 'Fe'  'Fe'   0.3463   0.8444 
 'International Tables Vol C Tables 4.2.6.8 and 6.1.1.4' 
 
_symmetry_cell_setting            'Monoclinic' 
_symmetry_space_group_name_H-M    'C2/c  ' 
 
loop_ 
 _symmetry_equiv_pos_as_xyz 
 'x, y, z' 
 '-x, y, -z+1/2' 
 'x+1/2, y+1/2, z' 
 '-x+1/2, y+1/2, -z+1/2' 
 '-x, -y, -z' 
 'x, -y, z-1/2' 
 '-x+1/2, -y+1/2, -z' 
 'x+1/2, -y+1/2, z-1/2' 
 
_cell_length_a                    23.4155(10) 
_cell_length_b                    20.7305(9) 
_cell_length_c                    17.8411(13) 
_cell_angle_alpha                 90.00 
_cell_angle_beta                  130.1660(10) 
_cell_angle_gamma                 90.00 
_cell_volume                      6618.0(6) 
_cell_formula_units_Z             8 
_cell_measurement_temperature     200(2) 
_cell_measurement_reflns_used     9846 
_cell_measurement_theta_min       2.99 
_cell_measurement_theta_max       30.39 
 
_exptl_crystal_description        'block' 
_exptl_crystal_colour             'black' 
_exptl_crystal_size_max           0.39 
_exptl_crystal_size_mid           0.20 
_exptl_crystal_size_min           0.17 
_exptl_crystal_density_meas       ? 
_exptl_crystal_density_diffrn     1.487 
_exptl_crystal_density_method     'not measured' 
_exptl_crystal_F_000              3064 
_exptl_absorpt_coefficient_mu     2.120 
_exptl_absorpt_correction_type    'empirical' 
_exptl_absorpt_correction_T_min   0.4918 
_exptl_absorpt_correction_T_max   0.7145 
_exptl_absorpt_process_details    'APEX II' 
 
_exptl_special_details 
; 
 ? 
; 
 
_diffrn_ambient_temperature       200(2) 
_diffrn_radiation_wavelength      0.71073 
_diffrn_radiation_type            MoK\a 
_diffrn_radiation_source          'fine-focus sealed tube' 
_diffrn_radiation_monochromator   graphite 
_diffrn_measurement_device_type   'APEX CCD' 
_diffrn_measurement_method        '\w scans' 
_diffrn_detector_area_resol_mean  ? 
_diffrn_standards_number          ? 
_diffrn_standards_interval_count  ? 
_diffrn_standards_interval_time   ? 
_diffrn_standards_decay_%         ? 
_diffrn_reflns_number             34208 
_diffrn_reflns_av_R_equivalents   0.0270 
_diffrn_reflns_av_sigmaI/netI     0.0281 
_diffrn_reflns_limit_h_min        -33 
_diffrn_reflns_limit_h_max        32 
_diffrn_reflns_limit_k_min        -29 
_diffrn_reflns_limit_k_max        24 
_diffrn_reflns_limit_l_min        -25 
_diffrn_reflns_limit_l_max        25 
_diffrn_reflns_theta_min          2.99 
_diffrn_reflns_theta_max          30.50 
_reflns_number_total              10052 
_reflns_number_gt                 7770 
_reflns_threshold_expression      >2sigma(I) 
 
_computing_data_collection      'Bruker APEX2'
_computing_cell_refinement      'Bruker SAINT'
_computing_data_reduction       'Bruker SAINT'  
_computing_structure_solution   'SHELXS-97 (Sheldrick, 2008)'
_computing_structure_refinement 'SHELXL-97 (Sheldrick, 2008)'
_computing_molecular_graphics   'Bruker SHELXTL'
_computing_publication_material 'Bruker SHELXTL'
 
_refine_special_details 
; 
 Refinement of F^2^ against ALL reflections.  The weighted R-factor wR and 
 goodness of fit S are based on F^2^, conventional R-factors R are based 
 on F, with F set to zero for negative F^2^. The threshold expression of 
 F^2^ > 2sigma(F^2^) is used only for calculating R-factors(gt) etc. and is 
 not relevant to the choice of reflections for refinement.  R-factors based 
 on F^2^ are statistically about twice as large as those based on F, and R- 
 factors based on ALL data will be even larger. 
; 
 
_refine_ls_structure_factor_coef  Fsqd  
_refine_ls_matrix_type            full 
_refine_ls_weighting_scheme       calc  
_refine_ls_weighting_details 
 'calc w=1/[\s^2^(Fo^2^)+(0.0305P)^2^+5.5848P] where P=(Fo^2^+2Fc^2^)/3' 
_atom_sites_solution_primary      direct 
_atom_sites_solution_secondary    difmap 
_atom_sites_solution_hydrogens    geom 
_refine_ls_hydrogen_treatment     constr 
_refine_ls_extinction_method      none 
_refine_ls_extinction_coef        ? 
_refine_ls_number_reflns          10052 
_refine_ls_number_parameters      331 
_refine_ls_number_restraints      0 
_refine_ls_R_factor_all           0.0488 
_refine_ls_R_factor_gt            0.0330 
_refine_ls_wR_factor_ref          0.0804 
_refine_ls_wR_factor_gt           0.0722 
_refine_ls_goodness_of_fit_ref    1.023 
_refine_ls_restrained_S_all       1.023 
_refine_ls_shift/su_max           0.001 
_refine_ls_shift/su_mean          0.000 
 
loop_ 
 _atom_site_label 
 _atom_site_type_symbol 
 _atom_site_fract_x 
 _atom_site_fract_y 
 _atom_site_fract_z 
 _atom_site_U_iso_or_equiv 
 _atom_site_adp_type 
 _atom_site_occupancy 
 _atom_site_symmetry_multiplicity 
 _atom_site_calc_flag 
 _atom_site_refinement_flags 
 _atom_site_disorder_assembly 
 _atom_site_disorder_group 
Fe1 Fe 0.234168(15) 0.320308(14) 0.76409(2) 0.03398(7) Uani 1 1 d . . . 
Fe2 Fe 0.274927(15) 0.363048(13) 0.66756(2) 0.03256(7) Uani 1 1 d . . . 
Fe3 Fe 0.371891(14) 0.353353(14) 0.86347(2) 0.03251(7) Uani 1 1 d . . . 
Fe4 Fe 0.316225(17) 0.246333(14) 0.75203(2) 0.03858(8) Uani 1 1 d . . . 
Cl1 Cl 0.14238(3) 0.31923(4) 0.76808(5) 0.06627(19) Uani 1 1 d . . . 
Cl2 Cl 0.24022(4) 0.42512(3) 0.54382(5) 0.05894(16) Uani 1 1 d . . . 
Cl3 Cl 0.46434(3) 0.40342(3) 0.99808(4) 0.05338(15) Uani 1 1 d . . . 
Cl4 Cl 0.33291(5) 0.14472(3) 0.73808(9) 0.0909(3) Uani 1 1 d . . . 
S1 S 0.39383(3) 0.31985(2) 0.76077(4) 0.03540(11) Uani 1 1 d . . . 
N1 N 0.22038(9) 0.28607(8) 0.65106(12) 0.0365(4) Uani 1 1 d . . . 
N2 N 0.28006(9) 0.40123(8) 0.77154(12) 0.0336(3) Uani 1 1 d . . . 
N3 N 0.32699(9) 0.27509(8) 0.86488(13) 0.0378(4) Uani 1 1 d . . . 
C1 C 0.15040(13) 0.25844(13) 0.55989(18) 0.0516(6) Uani 1 1 d . . . 
C2 C 0.12779(17) 0.20008(14) 0.5873(2) 0.0708(9) Uani 1 1 d . . . 
H2A H 0.1179 0.2136 0.6306 0.106 Uiso 1 1 calc R . . 
H2B H 0.1683 0.1683 0.6212 0.106 Uiso 1 1 calc R . . 
H2C H 0.0826 0.1807 0.5277 0.106 Uiso 1 1 calc R . . 
C3 C 0.16607(17) 0.23827(16) 0.4921(2) 0.0762(10) Uani 1 1 d . . . 
H3A H 0.2051 0.2052 0.5245 0.114 Uiso 1 1 calc R . . 
H3B H 0.1828 0.2759 0.4774 0.114 Uiso 1 1 calc R . . 
H3C H 0.1203 0.2209 0.4309 0.114 Uiso 1 1 calc R . . 
C4 C 0.08978(13) 0.31000(16) 0.51133(19) 0.0673(8) Uani 1 1 d . . . 
H4A H 0.0806 0.3223 0.5558 0.101 Uiso 1 1 calc R . . 
H4B H 0.0437 0.2929 0.4503 0.101 Uiso 1 1 calc R . . 
H4C H 0.1061 0.3479 0.4967 0.101 Uiso 1 1 calc R . . 
C5 C 0.26038(12) 0.46754(10) 0.77911(17) 0.0444(5) Uani 1 1 d . . . 
C6 C 0.17953(14) 0.48078(13) 0.6863(2) 0.0605(7) Uani 1 1 d . . . 
H6A H 0.1460 0.4502 0.6828 0.091 Uiso 1 1 calc R . . 
H6B H 0.1754 0.4756 0.6283 0.091 Uiso 1 1 calc R . . 
H6C H 0.1657 0.5249 0.6885 0.091 Uiso 1 1 calc R . . 
C7 C 0.31312(15) 0.51519(11) 0.7855(2) 0.0598(7) Uani 1 1 d . . . 
H7A H 0.3646 0.5065 0.8449 0.090 Uiso 1 1 calc R . . 
H7B H 0.2994 0.5593 0.7879 0.090 Uiso 1 1 calc R . . 
H7C H 0.3092 0.5103 0.7277 0.090 Uiso 1 1 calc R . . 
C8 C 0.26736(14) 0.47257(13) 0.8699(2) 0.0584(7) Uani 1 1 d . . . 
H8A H 0.2332 0.4418 0.8647 0.088 Uiso 1 1 calc R . . 
H8B H 0.2546 0.5164 0.8750 0.088 Uiso 1 1 calc R . . 
H8C H 0.3188 0.4628 0.9284 0.088 Uiso 1 1 calc R . . 
C9 C 0.34840(14) 0.23743(13) 0.95046(19) 0.0559(6) Uani 1 1 d . . . 
C10 C 0.34506(18) 0.28176(17) 1.0156(2) 0.0733(9) Uani 1 1 d . . . 
H10A H 0.2937 0.2972 0.9790 0.110 Uiso 1 1 calc R . . 
H10B H 0.3784 0.3187 1.0359 0.110 Uiso 1 1 calc R . . 
H10C H 0.3609 0.2580 1.0738 0.110 Uiso 1 1 calc R . . 
C11 C 0.42848(16) 0.21212(18) 1.0059(3) 0.0890(12) Uani 1 1 d . . . 
H11A H 0.4294 0.1838 0.9626 0.134 Uiso 1 1 calc R . . 
H11B H 0.4446 0.1879 1.0638 0.134 Uiso 1 1 calc R . . 
H11C H 0.4623 0.2486 1.0264 0.134 Uiso 1 1 calc R . . 
C12 C 0.29430(17) 0.18130(14) 0.9144(2) 0.0733(9) Uani 1 1 d . . . 
H12A H 0.2436 0.1980 0.8790 0.110 Uiso 1 1 calc R . . 
H12B H 0.3091 0.1556 0.9706 0.110 Uiso 1 1 calc R . . 
H12C H 0.2954 0.1541 0.8703 0.110 Uiso 1 1 calc R . . 
N4 N 0.0000 0.01987(11) 0.7500 0.0315(5) Uani 1 2 d S . . 
C13 C 0.06978(12) 0.06093(11) 0.81592(15) 0.0417(5) Uani 1 1 d . . . 
H13A H 0.1139 0.0321 0.8518 0.050 Uiso 1 1 calc R . . 
H13B H 0.0693 0.0823 0.8651 0.050 Uiso 1 1 calc R . . 
C14 C 0.07922(14) 0.11241(12) 0.76395(19) 0.0528(6) Uani 1 1 d . . . 
H14A H 0.1256 0.1363 0.8122 0.079 Uiso 1 1 calc R . . 
H14B H 0.0367 0.1422 0.7298 0.079 Uiso 1 1 calc R . . 
H14C H 0.0814 0.0919 0.7163 0.079 Uiso 1 1 calc R . . 
C15 C -0.00643(11) -0.02186(10) 0.81470(14) 0.0354(4) Uani 1 1 d . . . 
H15A H -0.0084 0.0069 0.8573 0.042 Uiso 1 1 calc R . . 
H15B H -0.0543 -0.0457 0.7720 0.042 Uiso 1 1 calc R . . 
C16 C 0.05587(12) -0.06983(11) 0.87884(16) 0.0441(5) Uani 1 1 d . . . 
H16A H 0.0469 -0.0943 0.9173 0.066 Uiso 1 1 calc R . . 
H16B H 0.1036 -0.0469 0.9232 0.066 Uiso 1 1 calc R . . 
H16C H 0.0577 -0.0995 0.8376 0.066 Uiso 1 1 calc R . . 
N5 N 0.5000 0.01358(16) 0.7500 0.0564(8) Uani 1 2 d S . . 
C17 C 0.5578(3) -0.0421(3) 0.8028(4) 0.0701(18) Uani 0.50 1 d P A -1 
H17A H 0.5918 -0.0330 0.8719 0.084 Uiso 0.50 1 d PR A -1 
H17B H 0.5861 -0.0431 0.7812 0.084 Uiso 0.50 1 d PR A -1 
C18 C 0.5241(5) -0.1074(3) 0.7883(6) 0.096(3) Uani 0.50 1 d P A -1 
H18A H 0.5629 -0.1393 0.8236 0.143 Uiso 0.50 1 d PR A -1 
H18B H 0.4966 -0.1072 0.8112 0.143 Uiso 0.50 1 d PR A -1 
H18C H 0.4909 -0.1174 0.7195 0.143 Uiso 0.50 1 d PR A -1 
C19 C 0.5474(3) 0.0750(3) 0.7865(5) 0.0803(19) Uani 0.50 1 d P A -1 
H19A H 0.5757 0.0751 0.7646 0.096 Uiso 0.50 1 d PR A -1 
H19B H 0.5822 0.0751 0.8569 0.096 Uiso 0.50 1 d PR A -1 
C20 C 0.5000 0.1375(3) 0.7500 0.0985(17) Uani 1 2 d S . . 
H20A H 0.5364 0.1746 0.7761 0.148 Uiso 0.50 1 d PR A -1 
H20B H 0.4703 0.1382 0.6811 0.148 Uiso 0.50 1 d PR A -1 
H20C H 0.4769 0.1382 0.7744 0.148 Uiso 0.50 1 d PR A -1 
C21 C 0.4423(3) 0.0063(4) 0.6496(4) 0.0730(18) Uani 0.50 1 d P A -1 
H21A H 0.4069 0.0408 0.6241 0.088 Uiso 0.50 1 d PR A -1 
H21B H 0.4309 -0.0383 0.6491 0.088 Uiso 0.50 1 d PR A -1 
C22 C 0.4728(9) 0.0012(10) 0.5939(13) 0.108(6) Uani 0.50 1 d P A -1 
H22A H 0.4326 -0.0050 0.5250 0.163 Uiso 0.50 1 d PR A -1 
H22B H 0.4976 0.0413 0.6041 0.163 Uiso 0.50 1 d PR A -1 
H22C H 0.5078 -0.0337 0.6191 0.163 Uiso 0.50 1 d PR A -1 
C23 C 0.4613(3) 0.0155(3) 0.7989(4) 0.0537(12) Uani 0.50 1 d P A -1 
H23A H 0.4316 -0.0229 0.7784 0.064 Uiso 0.50 1 d PR A -1 
H23B H 0.4274 0.0514 0.7707 0.064 Uiso 0.50 1 d PR A -1 
C24 C 0.5099(9) 0.0215(9) 0.9078(13) 0.083(3) Uani 0.50 1 d P A -1 
H24A H 0.4785 0.0220 0.9248 0.125 Uiso 0.50 1 d PR A -1 
H24B H 0.5429 -0.0150 0.9382 0.125 Uiso 0.50 1 d PR A -1 
H24C H 0.5387 0.0605 0.9304 0.125 Uiso 0.50 1 d PR A -1 
 
loop_ 
 _atom_site_aniso_label 
 _atom_site_aniso_U_11 
 _atom_site_aniso_U_22 
 _atom_site_aniso_U_33 
 _atom_site_aniso_U_23 
 _atom_site_aniso_U_13 
 _atom_site_aniso_U_12 
Fe1 0.03013(13) 0.03772(15) 0.04038(15) -0.00678(12) 0.02559(12) -0.00325(11) 
Fe2 0.03298(13) 0.03188(14) 0.03644(14) -0.00621(11) 0.02402(12) -0.00530(10) 
Fe3 0.02837(12) 0.03549(15) 0.03586(14) -0.00465(11) 0.02169(11) -0.00228(10) 
Fe4 0.04452(16) 0.02542(14) 0.0626(2) -0.00511(12) 0.04218(16) -0.00283(11) 
Cl1 0.0464(3) 0.0982(5) 0.0753(4) -0.0091(4) 0.0488(3) -0.0054(3) 
Cl2 0.0564(3) 0.0711(4) 0.0510(3) 0.0147(3) 0.0354(3) 0.0038(3) 
Cl3 0.0364(3) 0.0750(4) 0.0414(3) -0.0190(3) 0.0218(2) -0.0091(3) 
Cl4 0.1174(7) 0.0269(3) 0.1873(10) -0.0096(4) 0.1249(7) -0.0016(3) 
S1 0.0356(2) 0.0340(2) 0.0494(3) -0.0060(2) 0.0332(2) -0.00400(19) 
N1 0.0368(8) 0.0357(9) 0.0444(9) -0.0127(7) 0.0295(8) -0.0112(7) 
N2 0.0325(8) 0.0308(8) 0.0395(8) -0.0068(7) 0.0242(7) -0.0006(6) 
N3 0.0358(8) 0.0393(9) 0.0473(10) 0.0046(7) 0.0308(8) 0.0013(7) 
C1 0.0488(12) 0.0643(16) 0.0541(13) -0.0289(12) 0.0388(11) -0.0284(11) 
C2 0.0741(18) 0.0695(19) 0.087(2) -0.0363(16) 0.0603(17) -0.0438(15) 
C3 0.0786(19) 0.097(2) 0.0732(19) -0.0493(17) 0.0580(17) -0.0441(17) 
C4 0.0373(12) 0.099(2) 0.0499(14) -0.0121(14) 0.0208(11) -0.0157(13) 
C5 0.0448(11) 0.0327(11) 0.0570(13) -0.0092(9) 0.0334(11) 0.0043(9) 
C6 0.0514(14) 0.0503(14) 0.0690(17) -0.0030(12) 0.0340(13) 0.0166(11) 
C7 0.0679(16) 0.0296(11) 0.0868(19) -0.0106(12) 0.0521(16) -0.0026(11) 
C8 0.0580(14) 0.0551(15) 0.0661(16) -0.0202(12) 0.0419(13) 0.0040(12) 
C9 0.0491(13) 0.0649(16) 0.0615(15) 0.0221(13) 0.0392(12) 0.0046(11) 
C10 0.080(2) 0.100(2) 0.0539(16) 0.0047(15) 0.0494(16) -0.0120(17) 
C11 0.0547(17) 0.110(3) 0.092(2) 0.056(2) 0.0422(17) 0.0236(17) 
C12 0.0762(19) 0.0656(18) 0.094(2) 0.0218(16) 0.0621(18) -0.0051(15) 
N4 0.0312(10) 0.0316(11) 0.0322(11) 0.000 0.0206(9) 0.000 
C13 0.0415(11) 0.0418(11) 0.0392(11) -0.0056(9) 0.0248(9) -0.0100(9) 
C14 0.0629(15) 0.0453(13) 0.0599(15) -0.0066(11) 0.0440(13) -0.0160(11) 
C15 0.0403(10) 0.0356(10) 0.0376(10) 0.0009(8) 0.0284(9) -0.0013(8) 
C16 0.0464(12) 0.0428(12) 0.0441(11) 0.0100(9) 0.0296(10) 0.0040(9) 
N5 0.0320(13) 0.079(2) 0.0594(18) 0.000 0.0299(13) 0.000 
C17 0.043(3) 0.117(5) 0.062(3) 0.034(3) 0.039(3) 0.029(3) 
C18 0.122(9) 0.080(4) 0.146(9) 0.031(4) 0.115(8) 0.033(4) 
C19 0.066(4) 0.105(5) 0.084(4) 0.012(4) 0.055(4) -0.018(3) 
C20 0.128(5) 0.084(4) 0.099(4) 0.000 0.080(4) 0.000 
C21 0.050(3) 0.119(6) 0.038(3) 0.009(3) 0.023(2) 0.017(3) 
C22 0.081(8) 0.192(16) 0.053(5) 0.018(7) 0.044(5) 0.025(8) 
C23 0.042(2) 0.076(4) 0.059(3) 0.003(3) 0.040(2) -0.002(2) 
C24 0.075(6) 0.128(9) 0.066(5) -0.018(5) 0.054(5) -0.026(6) 
 
_geom_special_details 
; 
 All esds (except the esd in the dihedral angle between two l.s. planes) 
 are estimated using the full covariance matrix.  The cell esds are taken 
 into account individually in the estimation of esds in distances, angles 
 and torsion angles; correlations between esds in cell parameters are only 
 used when they are defined by crystal symmetry.  An approximate (isotropic) 
 treatment of cell esds is used for estimating esds involving l.s. planes. 
; 
 
loop_ 
 _geom_bond_atom_site_label_1 
 _geom_bond_atom_site_label_2 
 _geom_bond_distance 
 _geom_bond_site_symmetry_2 
 _geom_bond_publ_flag 
Fe1 N3 1.9479(17) . ? 
Fe1 N2 1.9500(16) . ? 
Fe1 N1 1.9582(17) . ? 
Fe1 Cl1 2.1959(6) . ? 
Fe1 Fe4 2.5735(4) . ? 
Fe1 Fe3 2.5762(4) . ? 
Fe1 Fe2 2.6043(4) . ? 
Fe2 N1 1.9441(16) . ? 
Fe2 N2 1.9481(16) . ? 
Fe2 Cl2 2.2080(7) . ? 
Fe2 S1 2.3121(6) . ? 
Fe2 Fe3 2.6787(4) . ? 
Fe2 Fe4 2.6797(4) . ? 
Fe3 N2 1.9363(16) . ? 
Fe3 N3 1.9423(17) . ? 
Fe3 Cl3 2.1964(6) . ? 
Fe3 S1 2.3060(6) . ? 
Fe3 Fe4 2.6891(4) . ? 
Fe4 N1 1.9352(18) . ? 
Fe4 N3 1.9539(18) . ? 
Fe4 Cl4 2.1857(7) . ? 
Fe4 S1 2.2986(5) . ? 
N1 C1 1.490(3) . ? 
N2 C5 1.483(2) . ? 
N3 C9 1.485(3) . ? 
C1 C2 1.522(4) . ? 
C1 C4 1.524(4) . ? 
C1 C3 1.532(3) . ? 
C2 H2A 0.9800 . ? 
C2 H2B 0.9800 . ? 
C2 H2C 0.9800 . ? 
C3 H3A 0.9800 . ? 
C3 H3B 0.9800 . ? 
C3 H3C 0.9800 . ? 
C4 H4A 0.9800 . ? 
C4 H4B 0.9800 . ? 
C4 H4C 0.9800 . ? 
C5 C8 1.522(3) . ? 
C5 C7 1.528(3) . ? 
C5 C6 1.535(3) . ? 
C6 H6A 0.9800 . ? 
C6 H6B 0.9800 . ? 
C6 H6C 0.9800 . ? 
C7 H7A 0.9800 . ? 
C7 H7B 0.9800 . ? 
C7 H7C 0.9800 . ? 
C8 H8A 0.9800 . ? 
C8 H8B 0.9800 . ? 
C8 H8C 0.9800 . ? 
C9 C10 1.523(4) . ? 
C9 C12 1.524(4) . ? 
C9 C11 1.542(4) . ? 
C10 H10A 0.9800 . ? 
C10 H10B 0.9800 . ? 
C10 H10C 0.9800 . ? 
C11 H11A 0.9800 . ? 
C11 H11B 0.9800 . ? 
C11 H11C 0.9800 . ? 
C12 H12A 0.9800 . ? 
C12 H12B 0.9800 . ? 
C12 H12C 0.9800 . ? 
N4 C13 1.516(2) 2_556 ? 
N4 C13 1.516(2) . ? 
N4 C15 1.526(2) . ? 
N4 C15 1.526(2) 2_556 ? 
C13 C14 1.521(3) . ? 
C13 H13A 0.9900 . ? 
C13 H13B 0.9900 . ? 
C14 H14A 0.9800 . ? 
C14 H14B 0.9800 . ? 
C14 H14C 0.9800 . ? 
C15 C16 1.508(3) . ? 
C15 H15A 0.9900 . ? 
C15 H15B 0.9900 . ? 
C16 H16A 0.9800 . ? 
C16 H16B 0.9800 . ? 
C16 H16C 0.9800 . ? 
N5 C21 1.391(5) . ? 
N5 C21 1.391(5) 2_656 ? 
N5 C19 1.531(7) 2_656 ? 
N5 C19 1.531(7) . ? 
N5 C17 1.551(6) 2_656 ? 
N5 C17 1.551(6) . ? 
N5 C23 1.614(4) 2_656 ? 
N5 C23 1.614(4) . ? 
C17 C18 1.502(10) . ? 
C17 H17A 0.9599 . ? 
C17 H17B 0.9600 . ? 
C18 H18A 0.9601 . ? 
C18 H18B 0.9601 . ? 
C18 H18C 0.9598 . ? 
C19 C20 1.551(8) . ? 
C19 H19A 0.9601 . ? 
C19 H19B 0.9600 . ? 
C20 C19 1.551(8) 2_656 ? 
C20 H20A 1.0122 . ? 
C20 H20B 0.9442 . ? 
C20 H20C 0.8855 . ? 
C21 C22 1.556(15) . ? 
C21 H21A 0.9601 . ? 
C21 H21B 0.9601 . ? 
C22 H22A 0.9599 . ? 
C22 H22B 0.9599 . ? 
C22 H22C 0.9598 . ? 
C23 C24 1.494(18) . ? 
C23 H23A 0.9601 . ? 
C23 H23B 0.9599 . ? 
C24 H24A 0.9601 . ? 
C24 H24B 0.9601 . ? 
C24 H24C 0.9599 . ? 
 
loop_ 
 _geom_angle_atom_site_label_1 
 _geom_angle_atom_site_label_2 
 _geom_angle_atom_site_label_3 
 _geom_angle 
 _geom_angle_site_symmetry_1 
 _geom_angle_site_symmetry_3 
 _geom_angle_publ_flag 
N3 Fe1 N2 96.51(7) . . ? 
N3 Fe1 N1 96.94(7) . . ? 
N2 Fe1 N1 95.72(7) . . ? 
N3 Fe1 Cl1 119.86(5) . . ? 
N2 Fe1 Cl1 120.96(5) . . ? 
N1 Fe1 Cl1 121.00(5) . . ? 
N3 Fe1 Fe4 48.83(5) . . ? 
N2 Fe1 Fe4 96.32(5) . . ? 
N1 Fe1 Fe4 48.24(5) . . ? 
Cl1 Fe1 Fe4 142.73(3) . . ? 
N3 Fe1 Fe3 48.44(5) . . ? 
N2 Fe1 Fe3 48.25(5) . . ? 
N1 Fe1 Fe3 96.14(5) . . ? 
Cl1 Fe1 Fe3 142.87(2) . . ? 
Fe4 Fe1 Fe3 62.957(11) . . ? 
N3 Fe1 Fe2 96.18(5) . . ? 
N2 Fe1 Fe2 48.05(5) . . ? 
N1 Fe1 Fe2 47.90(5) . . ? 
Cl1 Fe1 Fe2 143.97(3) . . ? 
Fe4 Fe1 Fe2 62.330(11) . . ? 
Fe3 Fe1 Fe2 62.270(11) . . ? 
N1 Fe2 N2 96.24(7) . . ? 
N1 Fe2 Cl2 123.01(6) . . ? 
N2 Fe2 Cl2 118.18(5) . . ? 
N1 Fe2 S1 99.19(5) . . ? 
N2 Fe2 S1 99.57(5) . . ? 
Cl2 Fe2 S1 116.15(2) . . ? 
N1 Fe2 Fe1 48.37(5) . . ? 
N2 Fe2 Fe1 48.11(5) . . ? 
Cl2 Fe2 Fe1 143.51(2) . . ? 
S1 Fe2 Fe1 100.222(18) . . ? 
N1 Fe2 Fe3 93.27(5) . . ? 
N2 Fe2 Fe3 46.22(5) . . ? 
Cl2 Fe2 Fe3 143.51(2) . . ? 
S1 Fe2 Fe3 54.440(15) . . ? 
Fe1 Fe2 Fe3 58.349(11) . . ? 
N1 Fe2 Fe4 46.17(5) . . ? 
N2 Fe2 Fe4 93.04(5) . . ? 
Cl2 Fe2 Fe4 148.77(2) . . ? 
S1 Fe2 Fe4 54.232(15) . . ? 
Fe1 Fe2 Fe4 58.272(11) . . ? 
Fe3 Fe2 Fe4 60.244(11) . . ? 
N2 Fe3 N3 97.15(7) . . ? 
N2 Fe3 Cl3 117.18(5) . . ? 
N3 Fe3 Cl3 122.72(6) . . ? 
N2 Fe3 S1 100.14(5) . . ? 
N3 Fe3 S1 99.12(5) . . ? 
Cl3 Fe3 S1 116.33(2) . . ? 
N2 Fe3 Fe1 48.71(5) . . ? 
N3 Fe3 Fe1 48.63(5) . . ? 
Cl3 Fe3 Fe1 142.33(2) . . ? 
S1 Fe3 Fe1 101.217(17) . . ? 
N2 Fe3 Fe2 46.58(5) . . ? 
N3 Fe3 Fe2 93.97(5) . . ? 
Cl3 Fe3 Fe2 143.07(2) . . ? 
S1 Fe3 Fe2 54.653(16) . . ? 
Fe1 Fe3 Fe2 59.381(10) . . ? 
N2 Fe3 Fe4 93.02(5) . . ? 
N3 Fe3 Fe4 46.53(5) . . ? 
Cl3 Fe3 Fe4 149.79(2) . . ? 
S1 Fe3 Fe4 54.141(15) . . ? 
Fe1 Fe3 Fe4 58.474(10) . . ? 
Fe2 Fe3 Fe4 59.896(11) . . ? 
N1 Fe4 N3 97.51(7) . . ? 
N1 Fe4 Cl4 119.30(6) . . ? 
N3 Fe4 Cl4 119.84(6) . . ? 
N1 Fe4 S1 99.92(5) . . ? 
N3 Fe4 S1 99.03(5) . . ? 
Cl4 Fe4 S1 117.08(3) . . ? 
N1 Fe4 Fe1 49.01(5) . . ? 
N3 Fe4 Fe1 48.63(5) . . ? 
Cl4 Fe4 Fe1 141.42(2) . . ? 
S1 Fe4 Fe1 101.500(17) . . ? 
N1 Fe4 Fe2 46.45(5) . . ? 
N3 Fe4 Fe2 93.67(5) . . ? 
Cl4 Fe4 Fe2 146.34(3) . . ? 
S1 Fe4 Fe2 54.701(15) . . ? 
Fe1 Fe4 Fe2 59.398(11) . . ? 
N1 Fe4 Fe3 93.16(5) . . ? 
N3 Fe4 Fe3 46.18(5) . . ? 
Cl4 Fe4 Fe3 147.39(3) . . ? 
S1 Fe4 Fe3 54.396(15) . . ? 
Fe1 Fe4 Fe3 58.569(11) . . ? 
Fe2 Fe4 Fe3 59.860(11) . . ? 
Fe4 S1 Fe3 71.463(17) . . ? 
Fe4 S1 Fe2 71.067(17) . . ? 
Fe3 S1 Fe2 70.907(17) . . ? 
C1 N1 Fe4 130.62(15) . . ? 
C1 N1 Fe2 129.29(15) . . ? 
Fe4 N1 Fe2 87.38(6) . . ? 
C1 N1 Fe1 126.74(13) . . ? 
Fe4 N1 Fe1 82.75(7) . . ? 
Fe2 N1 Fe1 83.73(6) . . ? 
C5 N2 Fe3 129.67(13) . . ? 
C5 N2 Fe2 129.14(14) . . ? 
Fe3 N2 Fe2 87.20(6) . . ? 
C5 N2 Fe1 127.84(13) . . ? 
Fe3 N2 Fe1 83.04(6) . . ? 
Fe2 N2 Fe1 83.84(6) . . ? 
C9 N3 Fe3 128.74(15) . . ? 
C9 N3 Fe1 129.64(14) . . ? 
Fe3 N3 Fe1 82.94(7) . . ? 
C9 N3 Fe4 129.26(16) . . ? 
Fe3 N3 Fe4 87.29(7) . . ? 
Fe1 N3 Fe4 82.54(7) . . ? 
N1 C1 C2 108.7(2) . . ? 
N1 C1 C4 108.44(19) . . ? 
C2 C1 C4 110.5(2) . . ? 
N1 C1 C3 108.19(18) . . ? 
C2 C1 C3 110.3(2) . . ? 
C4 C1 C3 110.6(2) . . ? 
C1 C2 H2A 109.5 . . ? 
C1 C2 H2B 109.5 . . ? 
H2A C2 H2B 109.5 . . ? 
C1 C2 H2C 109.5 . . ? 
H2A C2 H2C 109.5 . . ? 
H2B C2 H2C 109.5 . . ? 
C1 C3 H3A 109.5 . . ? 
C1 C3 H3B 109.5 . . ? 
H3A C3 H3B 109.5 . . ? 
C1 C3 H3C 109.5 . . ? 
H3A C3 H3C 109.5 . . ? 
H3B C3 H3C 109.5 . . ? 
C1 C4 H4A 109.5 . . ? 
C1 C4 H4B 109.5 . . ? 
H4A C4 H4B 109.5 . . ? 
C1 C4 H4C 109.5 . . ? 
H4A C4 H4C 109.5 . . ? 
H4B C4 H4C 109.5 . . ? 
N2 C5 C8 109.50(19) . . ? 
N2 C5 C7 108.80(17) . . ? 
C8 C5 C7 110.5(2) . . ? 
N2 C5 C6 107.86(18) . . ? 
C8 C5 C6 110.3(2) . . ? 
C7 C5 C6 109.9(2) . . ? 
C5 C6 H6A 109.5 . . ? 
C5 C6 H6B 109.5 . . ? 
H6A C6 H6B 109.5 . . ? 
C5 C6 H6C 109.5 . . ? 
H6A C6 H6C 109.5 . . ? 
H6B C6 H6C 109.5 . . ? 
C5 C7 H7A 109.5 . . ? 
C5 C7 H7B 109.5 . . ? 
H7A C7 H7B 109.5 . . ? 
C5 C7 H7C 109.5 . . ? 
H7A C7 H7C 109.5 . . ? 
H7B C7 H7C 109.5 . . ? 
C5 C8 H8A 109.5 . . ? 
C5 C8 H8B 109.5 . . ? 
H8A C8 H8B 109.5 . . ? 
C5 C8 H8C 109.5 . . ? 
H8A C8 H8C 109.5 . . ? 
H8B C8 H8C 109.5 . . ? 
N3 C9 C10 108.6(2) . . ? 
N3 C9 C12 109.3(2) . . ? 
C10 C9 C12 110.2(2) . . ? 
N3 C9 C11 107.6(2) . . ? 
C10 C9 C11 110.8(3) . . ? 
C12 C9 C11 110.3(3) . . ? 
C9 C10 H10A 109.5 . . ? 
C9 C10 H10B 109.5 . . ? 
H10A C10 H10B 109.5 . . ? 
C9 C10 H10C 109.5 . . ? 
H10A C10 H10C 109.5 . . ? 
H10B C10 H10C 109.5 . . ? 
C9 C11 H11A 109.5 . . ? 
C9 C11 H11B 109.5 . . ? 
H11A C11 H11B 109.5 . . ? 
C9 C11 H11C 109.5 . . ? 
H11A C11 H11C 109.5 . . ? 
H11B C11 H11C 109.5 . . ? 
C9 C12 H12A 109.5 . . ? 
C9 C12 H12B 109.5 . . ? 
H12A C12 H12B 109.5 . . ? 
C9 C12 H12C 109.5 . . ? 
H12A C12 H12C 109.5 . . ? 
H12B C12 H12C 109.5 . . ? 
C13 N4 C13 111.7(2) 2_556 . ? 
C13 N4 C15 108.81(11) 2_556 . ? 
C13 N4 C15 108.32(11) . . ? 
C13 N4 C15 108.32(11) 2_556 2_556 ? 
C13 N4 C15 108.81(11) . 2_556 ? 
C15 N4 C15 110.9(2) . 2_556 ? 
N4 C13 C14 115.39(17) . . ? 
N4 C13 H13A 108.4 . . ? 
C14 C13 H13A 108.4 . . ? 
N4 C13 H13B 108.4 . . ? 
C14 C13 H13B 108.4 . . ? 
H13A C13 H13B 107.5 . . ? 
C13 C14 H14A 109.5 . . ? 
C13 C14 H14B 109.5 . . ? 
H14A C14 H14B 109.5 . . ? 
C13 C14 H14C 109.5 . . ? 
H14A C14 H14C 109.5 . . ? 
H14B C14 H14C 109.5 . . ? 
C16 C15 N4 115.40(15) . . ? 
C16 C15 H15A 108.4 . . ? 
N4 C15 H15A 108.4 . . ? 
C16 C15 H15B 108.4 . . ? 
N4 C15 H15B 108.4 . . ? 
H15A C15 H15B 107.5 . . ? 
C15 C16 H16A 109.5 . . ? 
C15 C16 H16B 109.5 . . ? 
H16A C16 H16B 109.5 . . ? 
C15 C16 H16C 109.5 . . ? 
H16A C16 H16C 109.5 . . ? 
H16B C16 H16C 109.5 . . ? 
C21 N5 C21 167.5(7) . 2_656 ? 
C21 N5 C19 73.0(4) . 2_656 ? 
C21 N5 C19 118.3(5) 2_656 2_656 ? 
C21 N5 C19 118.3(5) . . ? 
C21 N5 C19 73.0(4) 2_656 . ? 
C19 N5 C19 67.6(5) 2_656 . ? 
C21 N5 C17 52.7(4) . 2_656 ? 
C21 N5 C17 116.3(5) 2_656 2_656 ? 
C19 N5 C17 104.5(4) 2_656 2_656 ? 
C19 N5 C17 170.4(4) . 2_656 ? 
C21 N5 C17 116.3(5) . . ? 
C21 N5 C17 52.7(4) 2_656 . ? 
C19 N5 C17 170.4(4) 2_656 . ? 
C19 N5 C17 104.5(4) . . ? 
C17 N5 C17 83.8(5) 2_656 . ? 
C21 N5 C23 74.0(3) . 2_656 ? 
C21 N5 C23 106.4(3) 2_656 2_656 ? 
C19 N5 C23 104.9(4) 2_656 2_656 ? 
C19 N5 C23 72.7(3) . 2_656 ? 
C17 N5 C23 105.3(3) 2_656 2_656 ? 
C17 N5 C23 76.9(3) . 2_656 ? 
C21 N5 C23 106.4(3) . . ? 
C21 N5 C23 74.0(3) 2_656 . ? 
C19 N5 C23 72.7(3) 2_656 . ? 
C19 N5 C23 104.9(4) . . ? 
C17 N5 C23 76.9(3) 2_656 . ? 
C17 N5 C23 105.3(3) . . ? 
C23 N5 C23 177.2(5) 2_656 . ? 
C18 C17 N5 114.2(5) . . ? 
C18 C17 H17A 107.9 . . ? 
N5 C17 H17A 108.1 . . ? 
C18 C17 H17B 109.5 . . ? 
N5 C17 H17B 109.3 . . ? 
H17A C17 H17B 107.7 . . ? 
C17 C18 H18A 109.8 . . ? 
C17 C18 H18B 110.1 . . ? 
H18A C18 H18B 109.4 . . ? 
C17 C18 H18C 108.5 . . ? 
H18A C18 H18C 109.5 . . ? 
H18B C18 H18C 109.5 . . ? 
N5 C19 C20 112.9(4) . . ? 
N5 C19 H19A 109.3 . . ? 
C20 C19 H19A 108.8 . . ? 
N5 C19 H19B 109.2 . . ? 
C20 C19 H19B 108.7 . . ? 
H19A C19 H19B 107.8 . . ? 
C19 C20 C19 66.6(5) 2_656 . ? 
C19 C20 H20A 172.6 2_656 . ? 
C19 C20 H20A 106.2 . . ? 
C19 C20 H20B 74.9 2_656 . ? 
C19 C20 H20B 106.6 . . ? 
H20A C20 H20B 106.5 . . ? 
C19 C20 H20C 73.7 2_656 . ? 
C19 C20 H20C 107.8 . . ? 
H20A C20 H20C 111.2 . . ? 
H20B C20 H20C 117.9 . . ? 
N5 C21 C22 111.4(8) . . ? 
N5 C21 H21A 110.7 . . ? 
C22 C21 H21A 111.0 . . ? 
N5 C21 H21B 98.7 . . ? 
C22 C21 H21B 99.7 . . ? 
H21A C21 H21B 124.3 . . ? 
C21 C22 H22A 110.6 . . ? 
C21 C22 H22B 106.9 . . ? 
H22A C22 H22B 109.5 . . ? 
C21 C22 H22C 110.8 . . ? 
H22A C22 H22C 109.5 . . ? 
H22B C22 H22C 109.5 . . ? 
C24 C23 N5 118.9(5) . . ? 
C24 C23 H23A 108.8 . . ? 
N5 C23 H23A 107.1 . . ? 
C24 C23 H23B 107.2 . . ? 
N5 C23 H23B 107.3 . . ? 
H23A C23 H23B 107.0 . . ? 
C23 C24 H24A 108.4 . . ? 
C23 C24 H24B 109.2 . . ? 
H24A C24 H24B 109.5 . . ? 
C23 C24 H24C 110.8 . . ? 
H24A C24 H24C 109.5 . . ? 
H24B C24 H24C 109.5 . . ? 
 
loop_ 
 _geom_torsion_atom_site_label_1 
 _geom_torsion_atom_site_label_2 
 _geom_torsion_atom_site_label_3 
 _geom_torsion_atom_site_label_4 
 _geom_torsion 
 _geom_torsion_site_symmetry_1 
 _geom_torsion_site_symmetry_2 
 _geom_torsion_site_symmetry_3 
 _geom_torsion_site_symmetry_4 
 _geom_torsion_publ_flag 
N3 Fe1 Fe2 N1 93.79(9) . . . . ? 
N2 Fe1 Fe2 N1 -173.00(9) . . . . ? 
Cl1 Fe1 Fe2 N1 -86.43(8) . . . . ? 
Fe4 Fe1 Fe2 N1 57.33(7) . . . . ? 
Fe3 Fe1 Fe2 N1 129.61(7) . . . . ? 
N3 Fe1 Fe2 N2 -93.22(8) . . . . ? 
N1 Fe1 Fe2 N2 173.00(9) . . . . ? 
Cl1 Fe1 Fe2 N2 86.57(7) . . . . ? 
Fe4 Fe1 Fe2 N2 -129.67(6) . . . . ? 
Fe3 Fe1 Fe2 N2 -57.39(6) . . . . ? 
N3 Fe1 Fe2 Cl2 -174.83(6) . . . . ? 
N2 Fe1 Fe2 Cl2 -81.61(7) . . . . ? 
N1 Fe1 Fe2 Cl2 91.38(8) . . . . ? 
Cl1 Fe1 Fe2 Cl2 4.95(6) . . . . ? 
Fe4 Fe1 Fe2 Cl2 148.72(4) . . . . ? 
Fe3 Fe1 Fe2 Cl2 -139.00(4) . . . . ? 
N3 Fe1 Fe2 S1 0.53(6) . . . . ? 
N2 Fe1 Fe2 S1 93.74(6) . . . . ? 
N1 Fe1 Fe2 S1 -93.26(7) . . . . ? 
Cl1 Fe1 Fe2 S1 -179.69(4) . . . . ? 
Fe4 Fe1 Fe2 S1 -35.925(16) . . . . ? 
Fe3 Fe1 Fe2 S1 36.357(16) . . . . ? 
N3 Fe1 Fe2 Fe3 -35.83(5) . . . . ? 
N2 Fe1 Fe2 Fe3 57.39(6) . . . . ? 
N1 Fe1 Fe2 Fe3 -129.61(7) . . . . ? 
Cl1 Fe1 Fe2 Fe3 143.95(4) . . . . ? 
Fe4 Fe1 Fe2 Fe3 -72.282(12) . . . . ? 
N3 Fe1 Fe2 Fe4 36.45(5) . . . . ? 
N2 Fe1 Fe2 Fe4 129.67(6) . . . . ? 
N1 Fe1 Fe2 Fe4 -57.33(7) . . . . ? 
Cl1 Fe1 Fe2 Fe4 -143.77(4) . . . . ? 
Fe3 Fe1 Fe2 Fe4 72.282(12) . . . . ? 
N3 Fe1 Fe3 N2 -173.96(9) . . . . ? 
N1 Fe1 Fe3 N2 92.20(8) . . . . ? 
Cl1 Fe1 Fe3 N2 -87.91(8) . . . . ? 
Fe4 Fe1 Fe3 N2 128.40(6) . . . . ? 
Fe2 Fe1 Fe3 N2 57.10(6) . . . . ? 
N2 Fe1 Fe3 N3 173.96(9) . . . . ? 
N1 Fe1 Fe3 N3 -93.85(9) . . . . ? 
Cl1 Fe1 Fe3 N3 86.05(8) . . . . ? 
Fe4 Fe1 Fe3 N3 -57.65(7) . . . . ? 
Fe2 Fe1 Fe3 N3 -128.94(7) . . . . ? 
N3 Fe1 Fe3 Cl3 -92.17(8) . . . . ? 
N2 Fe1 Fe3 Cl3 81.79(7) . . . . ? 
N1 Fe1 Fe3 Cl3 173.98(6) . . . . ? 
Cl1 Fe1 Fe3 Cl3 -6.12(6) . . . . ? 
Fe4 Fe1 Fe3 Cl3 -149.81(4) . . . . ? 
Fe2 Fe1 Fe3 Cl3 138.89(4) . . . . ? 
N3 Fe1 Fe3 S1 92.33(7) . . . . ? 
N2 Fe1 Fe3 S1 -93.71(7) . . . . ? 
N1 Fe1 Fe3 S1 -1.51(6) . . . . ? 
Cl1 Fe1 Fe3 S1 178.38(4) . . . . ? 
Fe4 Fe1 Fe3 S1 34.687(18) . . . . ? 
Fe2 Fe1 Fe3 S1 -36.608(17) . . . . ? 
N3 Fe1 Fe3 Fe2 128.94(7) . . . . ? 
N2 Fe1 Fe3 Fe2 -57.10(6) . . . . ? 
N1 Fe1 Fe3 Fe2 35.09(5) . . . . ? 
Cl1 Fe1 Fe3 Fe2 -145.01(4) . . . . ? 
Fe4 Fe1 Fe3 Fe2 71.295(13) . . . . ? 
N3 Fe1 Fe3 Fe4 57.65(7) . . . . ? 
N2 Fe1 Fe3 Fe4 -128.40(6) . . . . ? 
N1 Fe1 Fe3 Fe4 -36.20(5) . . . . ? 
Cl1 Fe1 Fe3 Fe4 143.70(4) . . . . ? 
Fe2 Fe1 Fe3 Fe4 -71.295(12) . . . . ? 
N1 Fe2 Fe3 N2 -95.51(8) . . . . ? 
Cl2 Fe2 Fe3 N2 78.71(8) . . . . ? 
S1 Fe2 Fe3 N2 165.53(7) . . . . ? 
Fe1 Fe2 Fe3 N2 -60.29(7) . . . . ? 
Fe4 Fe2 Fe3 N2 -129.23(7) . . . . ? 
N1 Fe2 Fe3 N3 0.59(7) . . . . ? 
N2 Fe2 Fe3 N3 96.09(8) . . . . ? 
Cl2 Fe2 Fe3 N3 174.80(6) . . . . ? 
S1 Fe2 Fe3 N3 -98.37(5) . . . . ? 
Fe1 Fe2 Fe3 N3 35.81(5) . . . . ? 
Fe4 Fe2 Fe3 N3 -33.14(5) . . . . ? 
N1 Fe2 Fe3 Cl3 -173.25(6) . . . . ? 
N2 Fe2 Fe3 Cl3 -77.75(7) . . . . ? 
Cl2 Fe2 Fe3 Cl3 0.96(6) . . . . ? 
S1 Fe2 Fe3 Cl3 87.79(4) . . . . ? 
Fe1 Fe2 Fe3 Cl3 -138.03(4) . . . . ? 
Fe4 Fe2 Fe3 Cl3 153.02(3) . . . . ? 
N1 Fe2 Fe3 S1 98.96(5) . . . . ? 
N2 Fe2 Fe3 S1 -165.53(7) . . . . ? 
Cl2 Fe2 Fe3 S1 -86.82(4) . . . . ? 
Fe1 Fe2 Fe3 S1 134.18(2) . . . . ? 
Fe4 Fe2 Fe3 S1 65.232(17) . . . . ? 
N1 Fe2 Fe3 Fe1 -35.22(5) . . . . ? 
N2 Fe2 Fe3 Fe1 60.29(7) . . . . ? 
Cl2 Fe2 Fe3 Fe1 139.00(4) . . . . ? 
S1 Fe2 Fe3 Fe1 -134.18(2) . . . . ? 
Fe4 Fe2 Fe3 Fe1 -68.949(12) . . . . ? 
N1 Fe2 Fe3 Fe4 33.73(5) . . . . ? 
N2 Fe2 Fe3 Fe4 129.23(7) . . . . ? 
Cl2 Fe2 Fe3 Fe4 -152.05(4) . . . . ? 
S1 Fe2 Fe3 Fe4 -65.232(17) . . . . ? 
Fe1 Fe2 Fe3 Fe4 68.949(12) . . . . ? 
N3 Fe1 Fe4 N1 174.83(9) . . . . ? 
N2 Fe1 Fe4 N1 -92.03(8) . . . . ? 
Cl1 Fe1 Fe4 N1 88.10(8) . . . . ? 
Fe3 Fe1 Fe4 N1 -128.07(6) . . . . ? 
Fe2 Fe1 Fe4 N1 -56.87(6) . . . . ? 
N2 Fe1 Fe4 N3 93.14(8) . . . . ? 
N1 Fe1 Fe4 N3 -174.83(9) . . . . ? 
Cl1 Fe1 Fe4 N3 -86.73(8) . . . . ? 
Fe3 Fe1 Fe4 N3 57.10(7) . . . . ? 
Fe2 Fe1 Fe4 N3 128.31(7) . . . . ? 
N3 Fe1 Fe4 Cl4 87.67(9) . . . . ? 
N2 Fe1 Fe4 Cl4 -179.19(7) . . . . ? 
N1 Fe1 Fe4 Cl4 -87.15(8) . . . . ? 
Cl1 Fe1 Fe4 Cl4 0.94(7) . . . . ? 
Fe3 Fe1 Fe4 Cl4 144.77(6) . . . . ? 
Fe2 Fe1 Fe4 Cl4 -144.02(6) . . . . ? 
N3 Fe1 Fe4 S1 -91.96(7) . . . . ? 
N2 Fe1 Fe4 S1 1.18(5) . . . . ? 
N1 Fe1 Fe4 S1 93.22(7) . . . . ? 
Cl1 Fe1 Fe4 S1 -178.69(4) . . . . ? 
Fe3 Fe1 Fe4 S1 -34.854(18) . . . . ? 
Fe2 Fe1 Fe4 S1 36.349(17) . . . . ? 
N3 Fe1 Fe4 Fe2 -128.31(7) . . . . ? 
N2 Fe1 Fe4 Fe2 -35.17(5) . . . . ? 
N1 Fe1 Fe4 Fe2 56.87(6) . . . . ? 
Cl1 Fe1 Fe4 Fe2 144.96(4) . . . . ? 
Fe3 Fe1 Fe4 Fe2 -71.203(12) . . . . ? 
N3 Fe1 Fe4 Fe3 -57.10(7) . . . . ? 
N2 Fe1 Fe4 Fe3 36.04(5) . . . . ? 
N1 Fe1 Fe4 Fe3 128.07(6) . . . . ? 
Cl1 Fe1 Fe4 Fe3 -143.83(4) . . . . ? 
Fe2 Fe1 Fe4 Fe3 71.203(12) . . . . ? 
N2 Fe2 Fe4 N1 95.73(8) . . . . ? 
Cl2 Fe2 Fe4 N1 -82.73(8) . . . . ? 
S1 Fe2 Fe4 N1 -164.66(7) . . . . ? 
Fe1 Fe2 Fe4 N1 60.71(7) . . . . ? 
Fe3 Fe2 Fe4 N1 129.78(7) . . . . ? 
N1 Fe2 Fe4 N3 -96.88(8) . . . . ? 
N2 Fe2 Fe4 N3 -1.15(7) . . . . ? 
Cl2 Fe2 Fe4 N3 -179.61(6) . . . . ? 
S1 Fe2 Fe4 N3 98.47(5) . . . . ? 
Fe1 Fe2 Fe4 N3 -36.17(5) . . . . ? 
Fe3 Fe2 Fe4 N3 32.91(5) . . . . ? 
N1 Fe2 Fe4 Cl4 77.92(8) . . . . ? 
N2 Fe2 Fe4 Cl4 173.65(6) . . . . ? 
Cl2 Fe2 Fe4 Cl4 -4.81(7) . . . . ? 
S1 Fe2 Fe4 Cl4 -86.74(5) . . . . ? 
Fe1 Fe2 Fe4 Cl4 138.63(5) . . . . ? 
Fe3 Fe2 Fe4 Cl4 -152.30(5) . . . . ? 
N1 Fe2 Fe4 S1 164.66(7) . . . . ? 
N2 Fe2 Fe4 S1 -99.61(5) . . . . ? 
Cl2 Fe2 Fe4 S1 81.93(4) . . . . ? 
Fe1 Fe2 Fe4 S1 -134.63(2) . . . . ? 
Fe3 Fe2 Fe4 S1 -65.559(18) . . . . ? 
N1 Fe2 Fe4 Fe1 -60.71(7) . . . . ? 
N2 Fe2 Fe4 Fe1 35.02(5) . . . . ? 
Cl2 Fe2 Fe4 Fe1 -143.44(4) . . . . ? 
S1 Fe2 Fe4 Fe1 134.63(2) . . . . ? 
Fe3 Fe2 Fe4 Fe1 69.074(12) . . . . ? 
N1 Fe2 Fe4 Fe3 -129.78(7) . . . . ? 
N2 Fe2 Fe4 Fe3 -34.06(5) . . . . ? 
Cl2 Fe2 Fe4 Fe3 147.48(4) . . . . ? 
S1 Fe2 Fe4 Fe3 65.559(18) . . . . ? 
Fe1 Fe2 Fe4 Fe3 -69.074(12) . . . . ? 
N2 Fe3 Fe4 N1 0.39(7) . . . . ? 
N3 Fe3 Fe4 N1 97.38(8) . . . . ? 
Cl3 Fe3 Fe4 N1 178.90(6) . . . . ? 
S1 Fe3 Fe4 N1 -99.94(5) . . . . ? 
Fe1 Fe3 Fe4 N1 36.52(5) . . . . ? 
Fe2 Fe3 Fe4 N1 -33.90(5) . . . . ? 
N2 Fe3 Fe4 N3 -96.99(8) . . . . ? 
Cl3 Fe3 Fe4 N3 81.52(8) . . . . ? 
S1 Fe3 Fe4 N3 162.67(7) . . . . ? 
Fe1 Fe3 Fe4 N3 -60.86(7) . . . . ? 
Fe2 Fe3 Fe4 N3 -131.28(7) . . . . ? 
N2 Fe3 Fe4 Cl4 -174.27(7) . . . . ? 
N3 Fe3 Fe4 Cl4 -77.28(8) . . . . ? 
Cl3 Fe3 Fe4 Cl4 4.24(7) . . . . ? 
S1 Fe3 Fe4 Cl4 85.40(5) . . . . ? 
Fe1 Fe3 Fe4 Cl4 -138.14(5) . . . . ? 
Fe2 Fe3 Fe4 Cl4 151.44(5) . . . . ? 
N2 Fe3 Fe4 S1 100.33(5) . . . . ? 
N3 Fe3 Fe4 S1 -162.67(7) . . . . ? 
Cl3 Fe3 Fe4 S1 -81.16(5) . . . . ? 
Fe1 Fe3 Fe4 S1 136.47(2) . . . . ? 
Fe2 Fe3 Fe4 S1 66.042(19) . . . . ? 
N2 Fe3 Fe4 Fe1 -36.13(5) . . . . ? 
N3 Fe3 Fe4 Fe1 60.86(7) . . . . ? 
Cl3 Fe3 Fe4 Fe1 142.37(4) . . . . ? 
S1 Fe3 Fe4 Fe1 -136.47(2) . . . . ? 
Fe2 Fe3 Fe4 Fe1 -70.425(12) . . . . ? 
N2 Fe3 Fe4 Fe2 34.29(5) . . . . ? 
N3 Fe3 Fe4 Fe2 131.28(7) . . . . ? 
Cl3 Fe3 Fe4 Fe2 -147.20(4) . . . . ? 
S1 Fe3 Fe4 Fe2 -66.042(19) . . . . ? 
Fe1 Fe3 Fe4 Fe2 70.425(12) . . . . ? 
N1 Fe4 S1 Fe3 86.77(5) . . . . ? 
N3 Fe4 S1 Fe3 -12.57(5) . . . . ? 
Cl4 Fe4 S1 Fe3 -142.89(4) . . . . ? 
Fe1 Fe4 S1 Fe3 36.852(17) . . . . ? 
Fe2 Fe4 S1 Fe3 75.539(16) . . . . ? 
N1 Fe4 S1 Fe2 11.23(5) . . . . ? 
N3 Fe4 S1 Fe2 -88.10(5) . . . . ? 
Cl4 Fe4 S1 Fe2 141.57(4) . . . . ? 
Fe1 Fe4 S1 Fe2 -38.687(17) . . . . ? 
Fe3 Fe4 S1 Fe2 -75.539(16) . . . . ? 
N2 Fe3 S1 Fe4 -86.38(5) . . . . ? 
N3 Fe3 S1 Fe4 12.64(5) . . . . ? 
Cl3 Fe3 S1 Fe4 146.30(3) . . . . ? 
Fe1 Fe3 S1 Fe4 -36.766(17) . . . . ? 
Fe2 Fe3 S1 Fe4 -75.755(16) . . . . ? 
N2 Fe3 S1 Fe2 -10.62(5) . . . . ? 
N3 Fe3 S1 Fe2 88.40(5) . . . . ? 
Cl3 Fe3 S1 Fe2 -137.94(3) . . . . ? 
Fe1 Fe3 S1 Fe2 38.989(16) . . . . ? 
Fe4 Fe3 S1 Fe2 75.755(16) . . . . ? 
N1 Fe2 S1 Fe4 -11.15(5) . . . . ? 
N2 Fe2 S1 Fe4 86.83(5) . . . . ? 
Cl2 Fe2 S1 Fe4 -145.12(3) . . . . ? 
Fe1 Fe2 S1 Fe4 37.955(16) . . . . ? 
Fe3 Fe2 S1 Fe4 76.295(16) . . . . ? 
N1 Fe2 S1 Fe3 -87.44(5) . . . . ? 
N2 Fe2 S1 Fe3 10.54(5) . . . . ? 
Cl2 Fe2 S1 Fe3 138.59(3) . . . . ? 
Fe1 Fe2 S1 Fe3 -38.340(16) . . . . ? 
Fe4 Fe2 S1 Fe3 -76.295(16) . . . . ? 
N3 Fe4 N1 C1 -129.35(18) . . . . ? 
Cl4 Fe4 N1 C1 1.2(2) . . . . ? 
S1 Fe4 N1 C1 130.07(17) . . . . ? 
Fe1 Fe4 N1 C1 -133.3(2) . . . . ? 
Fe2 Fe4 N1 C1 142.7(2) . . . . ? 
Fe3 Fe4 N1 C1 -175.54(17) . . . . ? 
N3 Fe4 N1 Fe2 87.92(7) . . . . ? 
Cl4 Fe4 N1 Fe2 -141.57(4) . . . . ? 
S1 Fe4 N1 Fe2 -12.66(6) . . . . ? 
Fe1 Fe4 N1 Fe2 84.01(6) . . . . ? 
Fe3 Fe4 N1 Fe2 41.73(5) . . . . ? 
N3 Fe4 N1 Fe1 3.91(7) . . . . ? 
Cl4 Fe4 N1 Fe1 134.42(4) . . . . ? 
S1 Fe4 N1 Fe1 -96.67(5) . . . . ? 
Fe2 Fe4 N1 Fe1 -84.01(6) . . . . ? 
Fe3 Fe4 N1 Fe1 -42.28(4) . . . . ? 
N2 Fe2 N1 C1 128.21(18) . . . . ? 
Cl2 Fe2 N1 C1 -1.4(2) . . . . ? 
S1 Fe2 N1 C1 -131.01(17) . . . . ? 
Fe1 Fe2 N1 C1 133.4(2) . . . . ? 
Fe3 Fe2 N1 C1 174.50(17) . . . . ? 
Fe4 Fe2 N1 C1 -143.6(2) . . . . ? 
N2 Fe2 N1 Fe4 -88.23(7) . . . . ? 
Cl2 Fe2 N1 Fe4 142.17(4) . . . . ? 
S1 Fe2 N1 Fe4 12.56(6) . . . . ? 
Fe1 Fe2 N1 Fe4 -82.99(6) . . . . ? 
Fe3 Fe2 N1 Fe4 -41.93(5) . . . . ? 
N2 Fe2 N1 Fe1 -5.24(7) . . . . ? 
Cl2 Fe2 N1 Fe1 -134.84(4) . . . . ? 
S1 Fe2 N1 Fe1 95.55(5) . . . . ? 
Fe3 Fe2 N1 Fe1 41.06(5) . . . . ? 
Fe4 Fe2 N1 Fe1 82.99(6) . . . . ? 
N3 Fe1 N1 C1 132.46(19) . . . . ? 
N2 Fe1 N1 C1 -130.24(19) . . . . ? 
Cl1 Fe1 N1 C1 1.3(2) . . . . ? 
Fe4 Fe1 N1 C1 136.4(2) . . . . ? 
Fe3 Fe1 N1 C1 -178.77(18) . . . . ? 
Fe2 Fe1 N1 C1 -135.5(2) . . . . ? 
N3 Fe1 N1 Fe4 -3.92(7) . . . . ? 
N2 Fe1 N1 Fe4 93.37(6) . . . . ? 
Cl1 Fe1 N1 Fe4 -135.08(4) . . . . ? 
Fe3 Fe1 N1 Fe4 44.85(5) . . . . ? 
Fe2 Fe1 N1 Fe4 88.15(6) . . . . ? 
N3 Fe1 N1 Fe2 -92.07(7) . . . . ? 
N2 Fe1 N1 Fe2 5.23(7) . . . . ? 
Cl1 Fe1 N1 Fe2 136.77(4) . . . . ? 
Fe4 Fe1 N1 Fe2 -88.15(6) . . . . ? 
Fe3 Fe1 N1 Fe2 -43.30(5) . . . . ? 
N3 Fe3 N2 C5 130.00(18) . . . . ? 
Cl3 Fe3 N2 C5 -2.6(2) . . . . ? 
S1 Fe3 N2 C5 -129.36(17) . . . . ? 
Fe1 Fe3 N2 C5 134.6(2) . . . . ? 
Fe2 Fe3 N2 C5 -141.3(2) . . . . ? 
Fe4 Fe3 N2 C5 176.55(17) . . . . ? 
N3 Fe3 N2 Fe2 -88.70(7) . . . . ? 
Cl3 Fe3 N2 Fe2 138.70(4) . . . . ? 
S1 Fe3 N2 Fe2 11.95(6) . . . . ? 
Fe1 Fe3 N2 Fe2 -84.13(6) . . . . ? 
Fe4 Fe3 N2 Fe2 -42.15(5) . . . . ? 
N3 Fe3 N2 Fe1 -4.57(7) . . . . ? 
Cl3 Fe3 N2 Fe1 -137.17(4) . . . . ? 
S1 Fe3 N2 Fe1 96.08(5) . . . . ? 
Fe2 Fe3 N2 Fe1 84.13(6) . . . . ? 
Fe4 Fe3 N2 Fe1 41.99(5) . . . . ? 
N1 Fe2 N2 C5 -129.80(17) . . . . ? 
Cl2 Fe2 N2 C5 3.07(18) . . . . ? 
S1 Fe2 N2 C5 129.75(16) . . . . ? 
Fe1 Fe2 N2 C5 -135.06(18) . . . . ? 
Fe3 Fe2 N2 C5 141.65(19) . . . . ? 
Fe4 Fe2 N2 C5 -176.02(16) . . . . ? 
N1 Fe2 N2 Fe3 88.55(7) . . . . ? 
Cl2 Fe2 N2 Fe3 -138.58(4) . . . . ? 
S1 Fe2 N2 Fe3 -11.89(6) . . . . ? 
Fe1 Fe2 N2 Fe3 83.30(6) . . . . ? 
Fe4 Fe2 N2 Fe3 42.33(5) . . . . ? 
N1 Fe2 N2 Fe1 5.26(7) . . . . ? 
Cl2 Fe2 N2 Fe1 138.13(4) . . . . ? 
S1 Fe2 N2 Fe1 -95.19(4) . . . . ? 
Fe3 Fe2 N2 Fe1 -83.30(6) . . . . ? 
Fe4 Fe2 N2 Fe1 -40.97(4) . . . . ? 
N3 Fe1 N2 C5 -131.47(17) . . . . ? 
N1 Fe1 N2 C5 130.85(17) . . . . ? 
Cl1 Fe1 N2 C5 -0.72(19) . . . . ? 
Fe4 Fe1 N2 C5 179.37(16) . . . . ? 
Fe3 Fe1 N2 C5 -136.01(19) . . . . ? 
Fe2 Fe1 N2 C5 136.07(19) . . . . ? 
N3 Fe1 N2 Fe3 4.55(7) . . . . ? 
N1 Fe1 N2 Fe3 -93.13(7) . . . . ? 
Cl1 Fe1 N2 Fe3 135.30(4) . . . . ? 
Fe4 Fe1 N2 Fe3 -44.61(5) . . . . ? 
Fe2 Fe1 N2 Fe3 -87.92(6) . . . . ? 
N3 Fe1 N2 Fe2 92.46(7) . . . . ? 
N1 Fe1 N2 Fe2 -5.22(7) . . . . ? 
Cl1 Fe1 N2 Fe2 -136.79(4) . . . . ? 
Fe4 Fe1 N2 Fe2 43.30(5) . . . . ? 
Fe3 Fe1 N2 Fe2 87.92(6) . . . . ? 
N2 Fe3 N3 C9 -131.88(18) . . . . ? 
Cl3 Fe3 N3 C9 -3.0(2) . . . . ? 
S1 Fe3 N3 C9 126.59(18) . . . . ? 
Fe1 Fe3 N3 C9 -136.5(2) . . . . ? 
Fe2 Fe3 N3 C9 -178.59(18) . . . . ? 
Fe4 Fe3 N3 C9 140.7(2) . . . . ? 
N2 Fe3 N3 Fe1 4.57(7) . . . . ? 
Cl3 Fe3 N3 Fe1 133.46(4) . . . . ? 
S1 Fe3 N3 Fe1 -96.96(5) . . . . ? 
Fe2 Fe3 N3 Fe1 -42.14(5) . . . . ? 
Fe4 Fe3 N3 Fe1 -82.81(6) . . . . ? 
N2 Fe3 N3 Fe4 87.38(7) . . . . ? 
Cl3 Fe3 N3 Fe4 -143.73(4) . . . . ? 
S1 Fe3 N3 Fe4 -14.15(6) . . . . ? 
Fe1 Fe3 N3 Fe4 82.81(6) . . . . ? 
Fe2 Fe3 N3 Fe4 40.67(5) . . . . ? 
N2 Fe1 N3 C9 131.2(2) . . . . ? 
N1 Fe1 N3 C9 -132.2(2) . . . . ? 
Cl1 Fe1 N3 C9 -0.3(2) . . . . ? 
Fe4 Fe1 N3 C9 -136.1(2) . . . . ? 
Fe3 Fe1 N3 C9 135.7(2) . . . . ? 
Fe2 Fe1 N3 C9 179.6(2) . . . . ? 
N2 Fe1 N3 Fe3 -4.53(7) . . . . ? 
N1 Fe1 N3 Fe3 92.06(7) . . . . ? 
Cl1 Fe1 N3 Fe3 -136.02(4) . . . . ? 
Fe4 Fe1 N3 Fe3 88.18(6) . . . . ? 
Fe2 Fe1 N3 Fe3 43.83(5) . . . . ? 
N2 Fe1 N3 Fe4 -92.71(7) . . . . ? 
N1 Fe1 N3 Fe4 3.89(7) . . . . ? 
Cl1 Fe1 N3 Fe4 135.80(4) . . . . ? 
Fe3 Fe1 N3 Fe4 -88.18(6) . . . . ? 
Fe2 Fe1 N3 Fe4 -44.35(5) . . . . ? 
N1 Fe4 N3 C9 132.44(17) . . . . ? 
Cl4 Fe4 N3 C9 2.29(19) . . . . ? 
S1 Fe4 N3 C9 -126.21(17) . . . . ? 
Fe1 Fe4 N3 C9 136.4(2) . . . . ? 
Fe2 Fe4 N3 C9 178.97(17) . . . . ? 
Fe3 Fe4 N3 C9 -140.4(2) . . . . ? 
N1 Fe4 N3 Fe3 -87.16(7) . . . . ? 
Cl4 Fe4 N3 Fe3 142.69(4) . . . . ? 
S1 Fe4 N3 Fe3 14.19(6) . . . . ? 
Fe1 Fe4 N3 Fe3 -83.23(6) . . . . ? 
Fe2 Fe4 N3 Fe3 -40.63(5) . . . . ? 
N1 Fe4 N3 Fe1 -3.94(7) . . . . ? 
Cl4 Fe4 N3 Fe1 -134.08(5) . . . . ? 
S1 Fe4 N3 Fe1 97.42(5) . . . . ? 
Fe2 Fe4 N3 Fe1 42.59(5) . . . . ? 
Fe3 Fe4 N3 Fe1 83.23(6) . . . . ? 
Fe4 N1 C1 C2 55.1(3) . . . . ? 
Fe2 N1 C1 C2 -176.26(16) . . . . ? 
Fe1 N1 C1 C2 -60.5(3) . . . . ? 
Fe4 N1 C1 C4 175.34(16) . . . . ? 
Fe2 N1 C1 C4 -56.1(2) . . . . ? 
Fe1 N1 C1 C4 59.7(3) . . . . ? 
Fe4 N1 C1 C3 -64.6(3) . . . . ? 
Fe2 N1 C1 C3 64.0(3) . . . . ? 
Fe1 N1 C1 C3 179.73(19) . . . . ? 
Fe3 N2 C5 C8 -58.6(2) . . . . ? 
Fe2 N2 C5 C8 174.99(15) . . . . ? 
Fe1 N2 C5 C8 57.8(2) . . . . ? 
Fe3 N2 C5 C7 62.2(3) . . . . ? 
Fe2 N2 C5 C7 -64.2(2) . . . . ? 
Fe1 N2 C5 C7 178.60(16) . . . . ? 
Fe3 N2 C5 C6 -178.68(16) . . . . ? 
Fe2 N2 C5 C6 54.9(2) . . . . ? 
Fe1 N2 C5 C6 -62.3(2) . . . . ? 
Fe3 N3 C9 C10 57.4(3) . . . . ? 
Fe1 N3 C9 C10 -60.0(3) . . . . ? 
Fe4 N3 C9 C10 -177.35(16) . . . . ? 
Fe3 N3 C9 C12 177.58(17) . . . . ? 
Fe1 N3 C9 C12 60.2(3) . . . . ? 
Fe4 N3 C9 C12 -57.1(3) . . . . ? 
Fe3 N3 C9 C11 -62.7(3) . . . . ? 
Fe1 N3 C9 C11 180.0(2) . . . . ? 
Fe4 N3 C9 C11 62.6(3) . . . . ? 
C13 N4 C13 C14 -51.91(16) 2_556 . . . ? 
C15 N4 C13 C14 -171.73(19) . . . . ? 
C15 N4 C13 C14 67.6(2) 2_556 . . . ? 
C13 N4 C15 C16 175.02(18) 2_556 . . . ? 
C13 N4 C15 C16 -63.4(2) . . . . ? 
C15 N4 C15 C16 55.97(15) 2_556 . . . ? 
C21 N5 C17 C18 -55.0(6) . . . . ? 
C21 N5 C17 C18 117.8(7) 2_656 . . . ? 
C19 N5 C17 C18 139(2) 2_656 . . . ? 
C19 N5 C17 C18 172.6(6) . . . . ? 
C17 N5 C17 C18 -12.2(4) 2_656 . . . ? 
C23 N5 C17 C18 -119.5(6) 2_656 . . . ? 
C23 N5 C17 C18 62.4(6) . . . . ? 
C21 N5 C19 C20 54.5(6) . . . . ? 
C21 N5 C19 C20 -131.4(5) 2_656 . . . ? 
C19 N5 C19 C20 0.0 2_656 . . . ? 
C17 N5 C19 C20 36(2) 2_656 . . . ? 
C17 N5 C19 C20 -174.3(4) . . . . ? 
C23 N5 C19 C20 114.8(5) 2_656 . . . ? 
C23 N5 C19 C20 -63.8(5) . . . . ? 
N5 C19 C20 C19 0.0 . . . 2_656 ? 
C21 N5 C21 C22 -88.3(10) 2_656 . . . ? 
C19 N5 C21 C22 116.5(10) 2_656 . . . ? 
C19 N5 C21 C22 64.6(10) . . . . ? 
C17 N5 C21 C22 -119.3(11) 2_656 . . . ? 
C17 N5 C21 C22 -61.1(10) . . . . ? 
C23 N5 C21 C22 4.9(9) 2_656 . . . ? 
C23 N5 C21 C22 -177.9(9) . . . . ? 
C21 N5 C23 C24 178.6(9) . . . . ? 
C21 N5 C23 C24 11.6(10) 2_656 . . . ? 
C19 N5 C23 C24 -115.6(9) 2_656 . . . ? 
C19 N5 C23 C24 -55.4(10) . . . . ? 
C17 N5 C23 C24 134.3(10) 2_656 . . . ? 
C17 N5 C23 C24 54.6(10) . . . . ? 
C23 N5 C23 C24 -85.3(9) 2_656 . . . ? 
 
_diffrn_measured_fraction_theta_max    0.994 
_diffrn_reflns_theta_full              30.50 
_diffrn_measured_fraction_theta_full   0.994 
_refine_diff_density_max    0.643 
_refine_diff_density_min   -0.791 
_refine_diff_density_rms    0.060 


#===END


 
data_sl16 
 
_audit_creation_method            SHELXL-97 
_chemical_name_systematic 
; 
 (Et4N)2[Fe4(mu3-NtBu)2(mu3-S)2Cl4] 
; 
_chemical_name_common              
; 
 (Et4N)2[Fe4(mu3-NtBu)2(mu3-S)2Cl4] 
; 
_chemical_melting_point           ? 
_chemical_formula_moiety           
;
(Et4N +)2 [ (Fe 3+)2 (Fe 2+)2 (NtBu 2-)2 (S 2-)2 (Cl -)4 ]
; 
_chemical_formula_sum 
 'C24 H58 Cl4 Fe4 N4 S2' 
_chemical_formula_weight          832.06 
 
loop_ 
 _atom_type_symbol 
 _atom_type_description 
 _atom_type_scat_dispersion_real 
 _atom_type_scat_dispersion_imag 
 _atom_type_scat_source 
 'C'  'C'   0.0033   0.0016 
 'International Tables Vol C Tables 4.2.6.8 and 6.1.1.4' 
 'H'  'H'   0.0000   0.0000 
 'International Tables Vol C Tables 4.2.6.8 and 6.1.1.4' 
 'N'  'N'   0.0061   0.0033 
 'International Tables Vol C Tables 4.2.6.8 and 6.1.1.4' 
 'S'  'S'   0.1246   0.1234 
 'International Tables Vol C Tables 4.2.6.8 and 6.1.1.4' 
 'Cl'  'Cl'   0.1484   0.1585 
 'International Tables Vol C Tables 4.2.6.8 and 6.1.1.4' 
 'Fe'  'Fe'   0.3463   0.8444 
 'International Tables Vol C Tables 4.2.6.8 and 6.1.1.4' 
 
_symmetry_cell_setting            'Monoclinic' 
_symmetry_space_group_name_H-M    'P2(1)/c  ' 
 
loop_ 
 _symmetry_equiv_pos_as_xyz 
 'x, y, z' 
 '-x, y+1/2, -z+1/2' 
 '-x, -y, -z' 
 'x, -y-1/2, z-1/2' 
 
_cell_length_a                    17.8185(12) 
_cell_length_b                    11.3121(7) 
_cell_length_c                    22.1301(14) 
_cell_angle_alpha                 90.00 
_cell_angle_beta                  108.7950(10) 
_cell_angle_gamma                 90.00 
_cell_volume                      4222.8(5) 
_cell_formula_units_Z             4 
_cell_measurement_temperature     200(2) 
_cell_measurement_reflns_used     3715 
_cell_measurement_theta_min       2.92 
_cell_measurement_theta_max       22.83 
 
_exptl_crystal_description        'plate' 
_exptl_crystal_colour             'black'
_exptl_crystal_size_max           0.19 
_exptl_crystal_size_mid           0.16 
_exptl_crystal_size_min           0.02 
_exptl_crystal_density_meas       ? 
_exptl_crystal_density_diffrn     1.309 
_exptl_crystal_density_method     'not measured' 
_exptl_crystal_F_000              1736 
_exptl_absorpt_coefficient_mu     1.717 
_exptl_absorpt_correction_type    'empirical' 
_exptl_absorpt_correction_T_min   0.7362 
_exptl_absorpt_correction_T_max   0.9665 
_exptl_absorpt_process_details    'APEX II' 
 
_exptl_special_details 
; 
 ? 
; 
 
_diffrn_ambient_temperature       200(2) 
_diffrn_radiation_wavelength      0.71073 
_diffrn_radiation_type            MoK\a 
_diffrn_radiation_source          'fine-focus sealed tube' 
_diffrn_radiation_monochromator   graphite 
_diffrn_measurement_device_type   'APEX CCD' 
_diffrn_measurement_method        '\w scans' 
_diffrn_detector_area_resol_mean  ? 
_diffrn_standards_number          ? 
_diffrn_standards_interval_count  ? 
_diffrn_standards_interval_time   ? 
_diffrn_standards_decay_%         ? 
_diffrn_reflns_number             34783 
_diffrn_reflns_av_R_equivalents   0.0707 
_diffrn_reflns_av_sigmaI/netI     0.0828 
_diffrn_reflns_limit_h_min        -23 
_diffrn_reflns_limit_h_max        23 
_diffrn_reflns_limit_k_min        -14 
_diffrn_reflns_limit_k_max        12 
_diffrn_reflns_limit_l_min        -29 
_diffrn_reflns_limit_l_max        29 
_diffrn_reflns_theta_min          2.92 
_diffrn_reflns_theta_max          28.00 
_reflns_number_total              10178 
_reflns_number_gt                 6330 
_reflns_threshold_expression      >2sigma(I) 
 
_computing_data_collection      'Bruker APEX2'
_computing_cell_refinement      'Bruker SAINT'
_computing_data_reduction       'Bruker SAINT'  
_computing_structure_solution   'SHELXS-97 (Sheldrick, 2008)'
_computing_structure_refinement 'SHELXL-97 (Sheldrick, 2008)'
_computing_molecular_graphics   'Bruker SHELXTL'
_computing_publication_material 'Bruker SHELXTL'
 
_refine_special_details 
; 
 Refinement of F^2^ against ALL reflections.  The weighted R-factor wR and 
 goodness of fit S are based on F^2^, conventional R-factors R are based 
 on F, with F set to zero for negative F^2^. The threshold expression of 
 F^2^ > 2sigma(F^2^) is used only for calculating R-factors(gt) etc. and is 
 not relevant to the choice of reflections for refinement.  R-factors based 
 on F^2^ are statistically about twice as large as those based on F, and R- 
 factors based on ALL data will be even larger. 
; 
 
_refine_ls_structure_factor_coef  Fsqd  
_refine_ls_matrix_type            full 
_refine_ls_weighting_scheme       calc  
_refine_ls_weighting_details 
 'calc w=1/[\s^2^(Fo^2^)+(0.0421P)^2^+0.0000P] where P=(Fo^2^+2Fc^2^)/3' 
_atom_sites_solution_primary      direct 
_atom_sites_solution_secondary    difmap 
_atom_sites_solution_hydrogens    geom 
_refine_ls_hydrogen_treatment     constr 
_refine_ls_extinction_method      none 
_refine_ls_extinction_coef        ? 
_refine_ls_number_reflns          10178 
_refine_ls_number_parameters      382 
_refine_ls_number_restraints      0 
_refine_ls_R_factor_all           0.0895 
_refine_ls_R_factor_gt            0.0498 
_refine_ls_wR_factor_ref          0.1188 
_refine_ls_wR_factor_gt           0.1020 
_refine_ls_goodness_of_fit_ref    0.978 
_refine_ls_restrained_S_all       0.978 
_refine_ls_shift/su_max           0.001 
_refine_ls_shift/su_mean          0.000 
 
loop_ 
 _atom_site_label 
 _atom_site_type_symbol 
 _atom_site_fract_x 
 _atom_site_fract_y 
 _atom_site_fract_z 
 _atom_site_U_iso_or_equiv 
 _atom_site_adp_type 
 _atom_site_occupancy 
 _atom_site_symmetry_multiplicity 
 _atom_site_calc_flag 
 _atom_site_refinement_flags 
 _atom_site_disorder_assembly 
 _atom_site_disorder_group 
Fe1 Fe 0.20234(3) 1.00838(5) 0.44405(2) 0.03002(14) Uani 1 1 d . . . 
Fe2 Fe 0.29429(3) 0.84420(5) 0.41669(2) 0.02977(14) Uani 1 1 d . . . 
Fe3 Fe 0.23231(3) 0.80790(5) 0.50822(3) 0.03326(14) Uani 1 1 d . . . 
Fe4 Fe 0.14041(3) 0.81767(5) 0.37934(3) 0.03275(14) Uani 1 1 d . . . 
Cl1 Cl 0.19102(7) 1.20471(9) 0.45063(5) 0.0446(3) Uani 1 1 d . . . 
Cl2 Cl 0.39983(6) 0.82483(10) 0.38412(5) 0.0450(3) Uani 1 1 d . . . 
Cl3 Cl 0.25454(8) 0.73103(11) 0.60585(5) 0.0564(3) Uani 1 1 d . . . 
Cl4 Cl 0.03794(6) 0.75087(11) 0.29825(6) 0.0543(3) Uani 1 1 d . . . 
S1 S 0.10782(6) 0.89438(9) 0.46534(5) 0.0373(2) Uani 1 1 d . . . 
S2 S 0.23249(6) 0.67271(9) 0.42874(5) 0.0375(2) Uani 1 1 d . . . 
N1 N 0.30035(17) 0.9289(3) 0.49627(14) 0.0306(7) Uani 1 1 d . . . 
C1 C 0.3715(2) 0.9832(3) 0.54156(17) 0.0323(9) Uani 1 1 d . . . 
C2 C 0.4345(2) 0.8897(4) 0.5675(2) 0.0450(11) Uani 1 1 d . . . 
H2A H 0.4482 0.8536 0.5322 0.067 Uiso 1 1 calc R . . 
H2B H 0.4142 0.8288 0.5897 0.067 Uiso 1 1 calc R . . 
H2C H 0.4818 0.9262 0.5974 0.067 Uiso 1 1 calc R . . 
C3 C 0.3492(2) 1.0405(4) 0.59648(19) 0.0465(11) Uani 1 1 d . . . 
H3A H 0.3300 0.9795 0.6193 0.070 Uiso 1 1 calc R . . 
H3B H 0.3075 1.0994 0.5791 0.070 Uiso 1 1 calc R . . 
H3C H 0.3960 1.0790 0.6260 0.070 Uiso 1 1 calc R . . 
C4 C 0.4023(2) 1.0783(4) 0.50624(19) 0.0441(11) Uani 1 1 d . . . 
H4A H 0.4163 1.0419 0.4711 0.066 Uiso 1 1 calc R . . 
H4B H 0.4493 1.1160 0.5359 0.066 Uiso 1 1 calc R . . 
H4C H 0.3610 1.1379 0.4891 0.066 Uiso 1 1 calc R . . 
N2 N 0.20515(18) 0.9385(3) 0.36325(14) 0.0304(7) Uani 1 1 d . . . 
C5 C 0.1995(2) 1.0017(3) 0.30301(17) 0.0343(9) Uani 1 1 d . . . 
C6 C 0.1195(2) 1.0658(4) 0.27861(19) 0.0422(10) Uani 1 1 d . . . 
H6A H 0.1156 1.1233 0.3106 0.063 Uiso 1 1 calc R . . 
H6B H 0.0764 1.0080 0.2710 0.063 Uiso 1 1 calc R . . 
H6C H 0.1153 1.1069 0.2387 0.063 Uiso 1 1 calc R . . 
C7 C 0.2062(3) 0.9116(4) 0.25270(18) 0.0422(10) Uani 1 1 d . . . 
H7A H 0.2575 0.8713 0.2684 0.063 Uiso 1 1 calc R . . 
H7B H 0.2020 0.9530 0.2128 0.063 Uiso 1 1 calc R . . 
H7C H 0.1634 0.8534 0.2449 0.063 Uiso 1 1 calc R . . 
C8 C 0.2666(3) 1.0921(4) 0.3161(2) 0.0448(11) Uani 1 1 d . . . 
H8A H 0.2618 1.1492 0.3479 0.067 Uiso 1 1 calc R . . 
H8B H 0.2632 1.1336 0.2764 0.067 Uiso 1 1 calc R . . 
H8C H 0.3177 1.0513 0.3322 0.067 Uiso 1 1 calc R . . 
N3 N 0.15140(18) 1.0022(3) 0.69889(14) 0.0321(7) Uani 1 1 d . . . 
C9 C 0.1773(2) 1.0407(4) 0.64305(18) 0.0390(10) Uani 1 1 d . . . 
H9A H 0.1778 0.9705 0.6164 0.047 Uiso 1 1 calc R . . 
H9B H 0.2323 1.0708 0.6598 0.047 Uiso 1 1 calc R . . 
C10 C 0.1259(3) 1.1351(4) 0.6009(2) 0.0577(13) Uani 1 1 d . . . 
H10A H 0.1466 1.1542 0.5661 0.087 Uiso 1 1 calc R . . 
H10B H 0.1263 1.2062 0.6263 0.087 Uiso 1 1 calc R . . 
H10C H 0.0714 1.1057 0.5831 0.087 Uiso 1 1 calc R . . 
C11 C 0.0657(2) 0.9618(4) 0.67620(18) 0.0378(10) Uani 1 1 d . . . 
H11A H 0.0518 0.9335 0.7136 0.045 Uiso 1 1 calc R . . 
H11B H 0.0316 1.0309 0.6585 0.045 Uiso 1 1 calc R . . 
C12 C 0.0465(3) 0.8652(4) 0.6264(2) 0.0533(12) Uani 1 1 d . . . 
H12A H -0.0099 0.8451 0.6147 0.080 Uiso 1 1 calc R . . 
H12B H 0.0784 0.7950 0.6438 0.080 Uiso 1 1 calc R . . 
H12C H 0.0584 0.8927 0.5885 0.080 Uiso 1 1 calc R . . 
C13 C 0.2031(2) 0.9000(4) 0.73202(19) 0.0394(10) Uani 1 1 d . . . 
H13A H 0.1992 0.8369 0.7002 0.047 Uiso 1 1 calc R . . 
H13B H 0.1815 0.8679 0.7646 0.047 Uiso 1 1 calc R . . 
C14 C 0.2898(3) 0.9286(4) 0.7641(2) 0.0581(13) Uani 1 1 d . . . 
H14A H 0.3180 0.8571 0.7842 0.087 Uiso 1 1 calc R . . 
H14B H 0.2949 0.9894 0.7967 0.087 Uiso 1 1 calc R . . 
H14C H 0.3128 0.9577 0.7322 0.087 Uiso 1 1 calc R . . 
C15 C 0.1596(3) 1.1078(4) 0.74345(19) 0.0426(10) Uani 1 1 d . . . 
H15A H 0.2142 1.1393 0.7543 0.051 Uiso 1 1 calc R . . 
H15B H 0.1228 1.1706 0.7204 0.051 Uiso 1 1 calc R . . 
C16 C 0.1428(3) 1.0805(4) 0.8047(2) 0.0576(13) Uani 1 1 d . . . 
H16A H 0.1494 1.1525 0.8306 0.086 Uiso 1 1 calc R . . 
H16B H 0.1798 1.0198 0.8286 0.086 Uiso 1 1 calc R . . 
H16C H 0.0883 1.0516 0.7947 0.086 Uiso 1 1 calc R . . 
N4 N 0.0000 1.0000 1.0000 0.0346(11) Uani 1 2 d S . . 
C17 C 0.0175(5) 0.9328(8) 0.9465(4) 0.044(2) Uani 0.50 1 d P A -1 
H17A H -0.0214 0.8681 0.9308 0.053 Uiso 0.50 1 calc PR A -1 
H17B H 0.0713 0.8982 0.9619 0.053 Uiso 0.50 1 calc PR A -1 
C18 C 0.0107(4) 1.0293(6) 0.8890(2) 0.098(2) Uani 1 1 d . . . 
H18A H 0.0222 0.9884 0.8539 0.147 Uiso 0.50 1 d PR A 1 
H18B H 0.0492 1.0932 0.9050 0.147 Uiso 0.50 1 d PR A 1 
H18C H -0.0429 1.0623 0.8737 0.147 Uiso 0.50 1 d PR A 1 
H18D H 0.0069 1.0845 0.8553 0.147 Uiso 0.50 1 d PR A 2 
H18E H 0.0632 0.9964 0.9038 0.147 Uiso 0.50 1 d PR A 2 
H18F H -0.0272 0.9669 0.8735 0.147 Uiso 0.50 1 d PR A 2 
C19 C -0.0811(5) 1.0530(7) 0.9791(4) 0.041(2) Uani 0.50 1 d P A -1 
H19A H -0.0849 1.1129 0.9456 0.049 Uiso 0.50 1 calc PR A -1 
H19B H -0.0904 1.0933 1.0158 0.049 Uiso 0.50 1 calc PR A -1 
C20 C -0.1474(3) 0.9538(5) 0.9519(3) 0.0726(16) Uani 1 1 d . . . 
H20A H -0.1998 0.9911 0.9390 0.109 Uiso 0.50 1 d PR A 1 
H20B H -0.1440 0.8950 0.9852 0.109 Uiso 0.50 1 d PR A 1 
H20C H -0.1393 0.9150 0.9149 0.109 Uiso 0.50 1 d PR A 1 
H20D H -0.1844 0.8904 0.9364 0.109 Uiso 0.50 1 d PR A 2 
H20E H -0.1582 0.9924 0.9868 0.109 Uiso 0.50 1 d PR A 2 
H20F H -0.1525 1.0097 0.9182 0.109 Uiso 0.50 1 d PR A 2 
C21 C 0.0585(5) 1.0965(8) 1.0240(4) 0.046(2) Uani 0.50 1 d P . -1 
H21A H 0.0474 1.1376 1.0596 0.055 Uiso 0.50 1 calc PR . -1 
H21B H 0.0533 1.1546 0.9894 0.055 Uiso 0.50 1 calc PR . -1 
C22 C 0.0072(6) 0.9050(8) 1.0506(4) 0.048(2) Uani 0.50 1 d P . -1 
H22A H 0.0611 0.8704 1.0645 0.058 Uiso 0.50 1 calc PR . -1 
H22B H -0.0317 0.8409 1.0333 0.058 Uiso 0.50 1 calc PR . -1 
N5 N 0.5000 0.5000 0.5000 0.0706(19) Uani 1 2 d S . . 
C23 C 0.5778(7) 0.5065(10) 0.5601(6) 0.074(3) Uani 0.50 1 d P B -1 
H23A H 0.5708 0.4575 0.5950 0.089 Uiso 0.50 1 calc PR B -1 
H23B H 0.6230 0.4741 0.5487 0.089 Uiso 0.50 1 calc PR B -1 
C24 C 0.5957(6) 0.6320(7) 0.5829(3) 0.166(4) Uani 1 1 d . . . 
H24A H 0.6446 0.6320 0.6195 0.249 Uiso 0.50 1 d PR B 1 
H24B H 0.5523 0.6652 0.5958 0.249 Uiso 0.50 1 d PR B 1 
H24C H 0.6034 0.6801 0.5485 0.249 Uiso 0.50 1 d PR B 1 
H24D H 0.6032 0.7119 0.5984 0.249 Uiso 0.50 1 d PR B 2 
H24E H 0.5946 0.5799 0.6169 0.249 Uiso 0.50 1 d PR B 2 
H24F H 0.6386 0.6101 0.5678 0.249 Uiso 0.50 1 d PR B 2 
C25 C 0.4355(9) 0.5593(13) 0.5044(10) 0.121(6) Uani 0.50 1 d P B -1 
H25A H 0.3951 0.5674 0.4618 0.145 Uiso 0.50 1 calc PR B -1 
H25B H 0.4508 0.6393 0.5223 0.145 Uiso 0.50 1 calc PR B -1 
C26 C 0.3972(7) 0.4764(11) 0.5553(5) 0.204(5) Uani 1 1 d . . . 
H26A H 0.3515 0.5183 0.5604 0.306 Uiso 0.50 1 d PR B 1 
H26B H 0.4383 0.4683 0.5970 0.306 Uiso 0.50 1 d PR B 1 
H26C H 0.3807 0.3977 0.5374 0.306 Uiso 0.50 1 d PR B 1 
H26D H 0.3755 0.4386 0.5848 0.306 Uiso 0.50 1 d PR B 2 
H26E H 0.4092 0.5573 0.5676 0.306 Uiso 0.50 1 d PR B 2 
H26F H 0.3593 0.4733 0.5131 0.306 Uiso 0.50 1 d PR B 2 
C27 C 0.4911(9) 0.3799(10) 0.4786(6) 0.084(4) Uani 0.50 1 d P . -1 
H27A H 0.4903 0.3268 0.5140 0.101 Uiso 0.50 1 calc PR . -1 
H27B H 0.5361 0.3568 0.4641 0.101 Uiso 0.50 1 calc PR . -1 
C28 C 0.5280(10) 0.5843(11) 0.4445(9) 0.127(6) Uani 0.50 1 d P . -1 
H28A H 0.4873 0.5815 0.4018 0.152 Uiso 0.50 1 calc PR . -1 
H28B H 0.5380 0.6677 0.4584 0.152 Uiso 0.50 1 calc PR . -1 
 
loop_ 
 _atom_site_aniso_label 
 _atom_site_aniso_U_11 
 _atom_site_aniso_U_22 
 _atom_site_aniso_U_33 
 _atom_site_aniso_U_23 
 _atom_site_aniso_U_13 
 _atom_site_aniso_U_12 
Fe1 0.0311(3) 0.0253(3) 0.0330(3) -0.0023(2) 0.0093(2) -0.0002(2) 
Fe2 0.0290(3) 0.0278(3) 0.0316(3) -0.0012(2) 0.0083(2) 0.0018(2) 
Fe3 0.0365(3) 0.0282(3) 0.0365(3) 0.0015(2) 0.0137(3) -0.0020(2) 
Fe4 0.0287(3) 0.0278(3) 0.0398(3) -0.0054(2) 0.0083(2) -0.0026(2) 
Cl1 0.0608(7) 0.0261(6) 0.0476(6) -0.0027(5) 0.0184(5) 0.0037(5) 
Cl2 0.0336(5) 0.0581(8) 0.0448(6) -0.0073(5) 0.0147(4) 0.0022(5) 
Cl3 0.0871(9) 0.0443(7) 0.0446(6) 0.0102(5) 0.0307(6) 0.0045(6) 
Cl4 0.0357(6) 0.0495(7) 0.0666(8) -0.0253(6) 0.0010(5) -0.0023(5) 
S1 0.0331(5) 0.0359(6) 0.0458(6) -0.0040(5) 0.0168(5) -0.0024(4) 
S2 0.0421(6) 0.0244(6) 0.0457(6) -0.0016(4) 0.0135(5) 0.0005(4) 
N1 0.0263(16) 0.034(2) 0.0312(17) -0.0021(14) 0.0080(13) 0.0002(14) 
C1 0.031(2) 0.036(2) 0.027(2) -0.0056(16) 0.0055(16) -0.0050(17) 
C2 0.034(2) 0.054(3) 0.042(2) 0.004(2) 0.0061(19) 0.004(2) 
C3 0.040(2) 0.056(3) 0.040(2) -0.012(2) 0.0087(19) -0.006(2) 
C4 0.034(2) 0.048(3) 0.046(3) -0.008(2) 0.0068(19) -0.013(2) 
N2 0.0362(18) 0.0246(18) 0.0277(16) -0.0021(13) 0.0066(13) -0.0001(14) 
C5 0.043(2) 0.028(2) 0.030(2) 0.0001(17) 0.0098(17) 0.0044(18) 
C6 0.047(3) 0.036(3) 0.038(2) 0.0030(19) 0.0063(19) 0.010(2) 
C7 0.056(3) 0.035(3) 0.037(2) -0.0009(19) 0.016(2) 0.007(2) 
C8 0.052(3) 0.036(3) 0.047(3) 0.008(2) 0.017(2) 0.000(2) 
N3 0.0375(18) 0.0267(19) 0.0339(18) 0.0026(14) 0.0138(14) 0.0011(14) 
C9 0.046(2) 0.039(3) 0.039(2) 0.0059(19) 0.0217(19) 0.0046(19) 
C10 0.066(3) 0.055(3) 0.059(3) 0.020(2) 0.028(3) 0.010(3) 
C11 0.041(2) 0.034(2) 0.042(2) 0.0048(19) 0.0198(19) 0.0028(18) 
C12 0.049(3) 0.053(3) 0.056(3) -0.010(2) 0.015(2) -0.006(2) 
C13 0.047(3) 0.028(2) 0.042(2) 0.0088(18) 0.014(2) 0.0112(19) 
C14 0.047(3) 0.056(3) 0.063(3) 0.010(3) 0.007(2) 0.011(2) 
C15 0.059(3) 0.030(2) 0.042(2) -0.0001(19) 0.020(2) 0.001(2) 
C16 0.085(4) 0.049(3) 0.046(3) -0.007(2) 0.032(3) 0.000(3) 
N4 0.046(3) 0.027(3) 0.035(3) 0.004(2) 0.019(2) 0.001(2) 
C17 0.051(5) 0.041(5) 0.046(5) -0.016(4) 0.025(4) -0.003(4) 
C18 0.129(6) 0.136(6) 0.042(3) 0.014(3) 0.047(3) -0.003(5) 
C19 0.043(5) 0.033(5) 0.044(5) 0.001(4) 0.011(4) 0.004(4) 
C20 0.053(3) 0.065(4) 0.096(4) -0.001(3) 0.018(3) -0.001(3) 
C21 0.055(6) 0.034(5) 0.051(6) -0.004(4) 0.019(4) 0.001(4) 
C22 0.063(6) 0.040(6) 0.046(5) 0.017(4) 0.025(5) 0.011(4) 
N5 0.094(5) 0.040(4) 0.060(4) 0.010(3) 0.001(4) 0.026(4) 
C23 0.083(8) 0.055(8) 0.072(8) 0.015(6) 0.007(6) 0.017(6) 
C24 0.274(12) 0.084(6) 0.087(6) 0.008(4) -0.016(6) -0.050(7) 
C25 0.073(10) 0.062(10) 0.22(2) 0.027(11) 0.044(11) 0.037(8) 
C26 0.186(11) 0.253(15) 0.188(11) -0.003(10) 0.081(9) 0.053(11) 
C27 0.137(13) 0.043(8) 0.065(8) -0.001(6) 0.021(8) -0.003(7) 
C28 0.122(13) 0.045(9) 0.187(17) 0.045(9) 0.012(12) 0.016(8) 
 
_geom_special_details 
; 
 All esds (except the esd in the dihedral angle between two l.s. planes) 
 are estimated using the full covariance matrix.  The cell esds are taken 
 into account individually in the estimation of esds in distances, angles 
 and torsion angles; correlations between esds in cell parameters are only 
 used when they are defined by crystal symmetry.  An approximate (isotropic) 
 treatment of cell esds is used for estimating esds involving l.s. planes. 
; 
 
loop_ 
 _geom_bond_atom_site_label_1 
 _geom_bond_atom_site_label_2 
 _geom_bond_distance 
 _geom_bond_site_symmetry_2 
 _geom_bond_publ_flag 
Fe1 N2 1.970(3) . ? 
Fe1 N1 1.973(3) . ? 
Fe1 Cl1 2.2391(11) . ? 
Fe1 S1 2.2876(11) . ? 
Fe1 Fe4 2.6275(8) . ? 
Fe1 Fe3 2.6375(8) . ? 
Fe1 Fe2 2.6718(7) . ? 
Fe2 N2 1.962(3) . ? 
Fe2 N1 1.977(3) . ? 
Fe2 Cl2 2.2311(11) . ? 
Fe2 S2 2.2883(11) . ? 
Fe2 Fe4 2.6135(8) . ? 
Fe2 Fe3 2.6330(7) . ? 
Fe3 N1 1.903(3) . ? 
Fe3 Cl3 2.2426(12) . ? 
Fe3 S1 2.3284(12) . ? 
Fe3 S2 2.3315(11) . ? 
Fe3 Fe4 2.7962(8) . ? 
Fe4 N2 1.895(3) . ? 
Fe4 Cl4 2.2392(11) . ? 
Fe4 S2 2.3281(12) . ? 
Fe4 S1 2.3291(11) . ? 
N1 C1 1.473(4) . ? 
C1 C2 1.513(5) . ? 
C1 C4 1.532(5) . ? 
C1 C3 1.538(5) . ? 
C2 H2A 0.9800 . ? 
C2 H2B 0.9800 . ? 
C2 H2C 0.9800 . ? 
C3 H3A 0.9800 . ? 
C3 H3B 0.9800 . ? 
C3 H3C 0.9800 . ? 
C4 H4A 0.9800 . ? 
C4 H4B 0.9800 . ? 
C4 H4C 0.9800 . ? 
N2 C5 1.487(5) . ? 
C5 C8 1.528(5) . ? 
C5 C6 1.534(5) . ? 
C5 C7 1.543(5) . ? 
C6 H6A 0.9800 . ? 
C6 H6B 0.9800 . ? 
C6 H6C 0.9800 . ? 
C7 H7A 0.9800 . ? 
C7 H7B 0.9800 . ? 
C7 H7C 0.9800 . ? 
C8 H8A 0.9800 . ? 
C8 H8B 0.9800 . ? 
C8 H8C 0.9800 . ? 
N3 C13 1.512(5) . ? 
N3 C9 1.516(4) . ? 
N3 C11 1.516(5) . ? 
N3 C15 1.526(5) . ? 
C9 C10 1.517(6) . ? 
C9 H9A 0.9900 . ? 
C9 H9B 0.9900 . ? 
C10 H10A 0.9800 . ? 
C10 H10B 0.9800 . ? 
C10 H10C 0.9800 . ? 
C11 C12 1.510(6) . ? 
C11 H11A 0.9900 . ? 
C11 H11B 0.9900 . ? 
C12 H12A 0.9800 . ? 
C12 H12B 0.9800 . ? 
C12 H12C 0.9800 . ? 
C13 C14 1.513(6) . ? 
C13 H13A 0.9900 . ? 
C13 H13B 0.9900 . ? 
C14 H14A 0.9800 . ? 
C14 H14B 0.9800 . ? 
C14 H14C 0.9800 . ? 
C15 C16 1.511(5) . ? 
C15 H15A 0.9900 . ? 
C15 H15B 0.9900 . ? 
C16 H16A 0.9800 . ? 
C16 H16B 0.9800 . ? 
C16 H16C 0.9800 . ? 
N4 C21 1.485(9) . ? 
N4 C21 1.485(9) 3_577 ? 
N4 C19 1.493(8) 3_577 ? 
N4 C19 1.493(8) . ? 
N4 C17 1.521(7) . ? 
N4 C17 1.521(7) 3_577 ? 
N4 C22 1.527(8) 3_577 ? 
N4 C22 1.527(8) . ? 
C17 C18 1.650(10) . ? 
C17 H17A 0.9900 . ? 
C17 H17B 0.9900 . ? 
C18 C22 1.648(10) 3_577 ? 
C18 H18A 0.9800 . ? 
C18 H18B 0.9800 . ? 
C18 H18C 0.9800 . ? 
C18 H18D 0.9599 . ? 
C18 H18E 0.9599 . ? 
C18 H18F 0.9599 . ? 
C19 C20 1.600(9) . ? 
C19 H19A 0.9900 . ? 
C19 H19B 0.9900 . ? 
C20 C21 1.603(10) 3_577 ? 
C20 H20A 0.9800 . ? 
C20 H20B 0.9800 . ? 
C20 H20C 0.9800 . ? 
C20 H20D 0.9600 . ? 
C20 H20E 0.9600 . ? 
C20 H20F 0.9599 . ? 
C21 C20 1.603(10) 3_577 ? 
C21 H21A 0.9900 . ? 
C21 H21B 0.9900 . ? 
C22 C18 1.648(10) 3_577 ? 
C22 H22A 0.9900 . ? 
C22 H22B 0.9900 . ? 
N5 C25 1.362(13) 3_666 ? 
N5 C25 1.362(13) . ? 
N5 C27 1.431(11) 3_666 ? 
N5 C27 1.431(11) . ? 
N5 C23 1.584(11) 3_666 ? 
N5 C23 1.584(11) . ? 
N5 C28 1.749(16) . ? 
N5 C28 1.749(16) 3_666 ? 
C23 C24 1.506(13) . ? 
C23 H23A 0.9900 . ? 
C23 H23B 0.9900 . ? 
C23 H24E 1.4541 . ? 
C23 H24F 1.5675 . ? 
C24 C27 1.705(15) 3_666 ? 
C24 H24A 0.9800 . ? 
C24 H24B 0.9800 . ? 
C24 H24C 0.9800 . ? 
C24 H24D 0.9600 . ? 
C24 H24E 0.9600 . ? 
C24 H24F 0.9600 . ? 
C25 C26 1.762(17) . ? 
C25 H25A 0.9900 . ? 
C25 H25B 0.9900 . ? 
C26 C28 1.498(16) 3_666 ? 
C26 H26A 0.9800 . ? 
C26 H26B 0.9800 . ? 
C26 H26C 0.9800 . ? 
C26 H26D 0.9599 . ? 
C26 H26E 0.9600 . ? 
C26 H26F 0.9600 . ? 
C27 C24 1.705(15) 3_666 ? 
C27 H27A 0.9900 . ? 
C27 H27B 0.9900 . ? 
C28 C26 1.498(16) 3_666 ? 
C28 H28A 0.9900 . ? 
C28 H28B 0.9900 . ? 
 
loop_ 
 _geom_angle_atom_site_label_1 
 _geom_angle_atom_site_label_2 
 _geom_angle_atom_site_label_3 
 _geom_angle 
 _geom_angle_site_symmetry_1 
 _geom_angle_site_symmetry_3 
 _geom_angle_publ_flag 
N2 Fe1 N1 94.16(12) . . ? 
N2 Fe1 Cl1 119.08(10) . . ? 
N1 Fe1 Cl1 119.67(10) . . ? 
N2 Fe1 S1 101.34(9) . . ? 
N1 Fe1 S1 101.19(9) . . ? 
Cl1 Fe1 S1 117.25(4) . . ? 
N2 Fe1 Fe4 45.99(9) . . ? 
N1 Fe1 Fe4 94.72(9) . . ? 
Cl1 Fe1 Fe4 144.99(4) . . ? 
S1 Fe1 Fe4 56.06(3) . . ? 
N2 Fe1 Fe3 94.82(9) . . ? 
N1 Fe1 Fe3 46.02(9) . . ? 
Cl1 Fe1 Fe3 145.56(4) . . ? 
S1 Fe1 Fe3 55.88(3) . . ? 
Fe4 Fe1 Fe3 64.16(2) . . ? 
N2 Fe1 Fe2 47.07(9) . . ? 
N1 Fe1 Fe2 47.51(9) . . ? 
Cl1 Fe1 Fe2 141.16(4) . . ? 
S1 Fe1 Fe2 101.58(3) . . ? 
Fe4 Fe1 Fe2 59.09(2) . . ? 
Fe3 Fe1 Fe2 59.46(2) . . ? 
N2 Fe2 N1 94.27(12) . . ? 
N2 Fe2 Cl2 117.49(9) . . ? 
N1 Fe2 Cl2 121.71(9) . . ? 
N2 Fe2 S2 101.82(9) . . ? 
N1 Fe2 S2 101.39(9) . . ? 
Cl2 Fe2 S2 116.22(5) . . ? 
N2 Fe2 Fe4 46.28(9) . . ? 
N1 Fe2 Fe4 95.05(9) . . ? 
Cl2 Fe2 Fe4 142.57(4) . . ? 
S2 Fe2 Fe4 56.24(3) . . ? 
N2 Fe2 Fe3 95.15(9) . . ? 
N1 Fe2 Fe3 46.09(9) . . ? 
Cl2 Fe2 Fe3 147.07(4) . . ? 
S2 Fe2 Fe3 56.03(3) . . ? 
Fe4 Fe2 Fe3 64.41(2) . . ? 
N2 Fe2 Fe1 47.32(8) . . ? 
N1 Fe2 Fe1 47.37(9) . . ? 
Cl2 Fe2 Fe1 141.60(4) . . ? 
S2 Fe2 Fe1 102.10(3) . . ? 
Fe4 Fe2 Fe1 59.61(2) . . ? 
Fe3 Fe2 Fe1 59.62(2) . . ? 
N1 Fe3 Cl3 119.35(10) . . ? 
N1 Fe3 S1 101.94(10) . . ? 
Cl3 Fe3 S1 113.89(5) . . ? 
N1 Fe3 S2 102.20(9) . . ? 
Cl3 Fe3 S2 115.45(5) . . ? 
S1 Fe3 S2 101.59(4) . . ? 
N1 Fe3 Fe2 48.47(9) . . ? 
Cl3 Fe3 Fe2 144.48(4) . . ? 
S1 Fe3 Fe2 101.63(3) . . ? 
S2 Fe3 Fe2 54.48(3) . . ? 
N1 Fe3 Fe1 48.24(9) . . ? 
Cl3 Fe3 Fe1 142.60(4) . . ? 
S1 Fe3 Fe1 54.43(3) . . ? 
S2 Fe3 Fe1 101.95(3) . . ? 
Fe2 Fe3 Fe1 60.92(2) . . ? 
N1 Fe3 Fe4 91.13(9) . . ? 
Cl3 Fe3 Fe4 149.50(4) . . ? 
S1 Fe3 Fe4 53.12(3) . . ? 
S2 Fe3 Fe4 53.07(3) . . ? 
Fe2 Fe3 Fe4 57.46(2) . . ? 
Fe1 Fe3 Fe4 57.75(2) . . ? 
N2 Fe4 Cl4 118.78(10) . . ? 
N2 Fe4 S2 102.53(10) . . ? 
Cl4 Fe4 S2 114.08(5) . . ? 
N2 Fe4 S1 102.23(9) . . ? 
Cl4 Fe4 S1 115.28(4) . . ? 
S2 Fe4 S1 101.67(4) . . ? 
N2 Fe4 Fe2 48.44(9) . . ? 
Cl4 Fe4 Fe2 142.53(4) . . ? 
S2 Fe4 Fe2 54.80(3) . . ? 
S1 Fe4 Fe2 102.19(3) . . ? 
N2 Fe4 Fe1 48.38(9) . . ? 
Cl4 Fe4 Fe1 143.58(4) . . ? 
S2 Fe4 Fe1 102.34(3) . . ? 
S1 Fe4 Fe1 54.57(3) . . ? 
Fe2 Fe4 Fe1 61.30(2) . . ? 
N2 Fe4 Fe3 91.63(9) . . ? 
Cl4 Fe4 Fe3 149.59(4) . . ? 
S2 Fe4 Fe3 53.18(3) . . ? 
S1 Fe4 Fe3 53.09(3) . . ? 
Fe2 Fe4 Fe3 58.134(19) . . ? 
Fe1 Fe4 Fe3 58.10(2) . . ? 
Fe1 S1 Fe3 69.69(3) . . ? 
Fe1 S1 Fe4 69.37(3) . . ? 
Fe3 S1 Fe4 73.79(3) . . ? 
Fe2 S2 Fe4 68.96(3) . . ? 
Fe2 S2 Fe3 69.49(3) . . ? 
Fe4 S2 Fe3 73.75(4) . . ? 
C1 N1 Fe3 130.7(2) . . ? 
C1 N1 Fe1 127.9(2) . . ? 
Fe3 N1 Fe1 85.75(12) . . ? 
C1 N1 Fe2 126.6(2) . . ? 
Fe3 N1 Fe2 85.44(12) . . ? 
Fe1 N1 Fe2 85.13(11) . . ? 
N1 C1 C2 109.7(3) . . ? 
N1 C1 C4 108.5(3) . . ? 
C2 C1 C4 109.9(3) . . ? 
N1 C1 C3 109.2(3) . . ? 
C2 C1 C3 110.1(3) . . ? 
C4 C1 C3 109.4(3) . . ? 
C1 C2 H2A 109.5 . . ? 
C1 C2 H2B 109.5 . . ? 
H2A C2 H2B 109.5 . . ? 
C1 C2 H2C 109.5 . . ? 
H2A C2 H2C 109.5 . . ? 
H2B C2 H2C 109.5 . . ? 
C1 C3 H3A 109.5 . . ? 
C1 C3 H3B 109.5 . . ? 
H3A C3 H3B 109.5 . . ? 
C1 C3 H3C 109.5 . . ? 
H3A C3 H3C 109.5 . . ? 
H3B C3 H3C 109.5 . . ? 
C1 C4 H4A 109.5 . . ? 
C1 C4 H4B 109.5 . . ? 
H4A C4 H4B 109.5 . . ? 
C1 C4 H4C 109.5 . . ? 
H4A C4 H4C 109.5 . . ? 
H4B C4 H4C 109.5 . . ? 
C5 N2 Fe4 130.2(2) . . ? 
C5 N2 Fe2 127.6(2) . . ? 
Fe4 N2 Fe2 85.28(12) . . ? 
C5 N2 Fe1 127.3(2) . . ? 
Fe4 N2 Fe1 85.63(12) . . ? 
Fe2 N2 Fe1 85.60(12) . . ? 
N2 C5 C8 109.2(3) . . ? 
N2 C5 C6 109.2(3) . . ? 
C8 C5 C6 109.4(3) . . ? 
N2 C5 C7 109.3(3) . . ? 
C8 C5 C7 109.9(3) . . ? 
C6 C5 C7 109.7(3) . . ? 
C5 C6 H6A 109.5 . . ? 
C5 C6 H6B 109.5 . . ? 
H6A C6 H6B 109.5 . . ? 
C5 C6 H6C 109.5 . . ? 
H6A C6 H6C 109.5 . . ? 
H6B C6 H6C 109.5 . . ? 
C5 C7 H7A 109.5 . . ? 
C5 C7 H7B 109.5 . . ? 
H7A C7 H7B 109.5 . . ? 
C5 C7 H7C 109.5 . . ? 
H7A C7 H7C 109.5 . . ? 
H7B C7 H7C 109.5 . . ? 
C5 C8 H8A 109.5 . . ? 
C5 C8 H8B 109.5 . . ? 
H8A C8 H8B 109.5 . . ? 
C5 C8 H8C 109.5 . . ? 
H8A C8 H8C 109.5 . . ? 
H8B C8 H8C 109.5 . . ? 
C13 N3 C9 108.5(3) . . ? 
C13 N3 C11 108.8(3) . . ? 
C9 N3 C11 110.8(3) . . ? 
C13 N3 C15 111.6(3) . . ? 
C9 N3 C15 108.1(3) . . ? 
C11 N3 C15 109.0(3) . . ? 
N3 C9 C10 114.9(3) . . ? 
N3 C9 H9A 108.5 . . ? 
C10 C9 H9A 108.5 . . ? 
N3 C9 H9B 108.5 . . ? 
C10 C9 H9B 108.5 . . ? 
H9A C9 H9B 107.5 . . ? 
C9 C10 H10A 109.5 . . ? 
C9 C10 H10B 109.5 . . ? 
H10A C10 H10B 109.5 . . ? 
C9 C10 H10C 109.5 . . ? 
H10A C10 H10C 109.5 . . ? 
H10B C10 H10C 109.5 . . ? 
C12 C11 N3 115.3(3) . . ? 
C12 C11 H11A 108.4 . . ? 
N3 C11 H11A 108.4 . . ? 
C12 C11 H11B 108.4 . . ? 
N3 C11 H11B 108.4 . . ? 
H11A C11 H11B 107.5 . . ? 
C11 C12 H12A 109.5 . . ? 
C11 C12 H12B 109.5 . . ? 
H12A C12 H12B 109.5 . . ? 
C11 C12 H12C 109.5 . . ? 
H12A C12 H12C 109.5 . . ? 
H12B C12 H12C 109.5 . . ? 
N3 C13 C14 115.8(3) . . ? 
N3 C13 H13A 108.3 . . ? 
C14 C13 H13A 108.3 . . ? 
N3 C13 H13B 108.3 . . ? 
C14 C13 H13B 108.3 . . ? 
H13A C13 H13B 107.4 . . ? 
C13 C14 H14A 109.5 . . ? 
C13 C14 H14B 109.5 . . ? 
H14A C14 H14B 109.5 . . ? 
C13 C14 H14C 109.5 . . ? 
H14A C14 H14C 109.5 . . ? 
H14B C14 H14C 109.5 . . ? 
C16 C15 N3 114.5(3) . . ? 
C16 C15 H15A 108.6 . . ? 
N3 C15 H15A 108.6 . . ? 
C16 C15 H15B 108.6 . . ? 
N3 C15 H15B 108.6 . . ? 
H15A C15 H15B 107.6 . . ? 
C15 C16 H16A 109.5 . . ? 
C15 C16 H16B 109.5 . . ? 
H16A C16 H16B 109.5 . . ? 
C15 C16 H16C 109.5 . . ? 
H16A C16 H16C 109.5 . . ? 
H16B C16 H16C 109.5 . . ? 
C21 N4 C21 180.000(2) . 3_577 ? 
C21 N4 C19 71.7(5) . 3_577 ? 
C21 N4 C19 108.3(5) 3_577 3_577 ? 
C21 N4 C19 108.3(5) . . ? 
C21 N4 C19 71.7(5) 3_577 . ? 
C19 N4 C19 180.000(5) 3_577 . ? 
C21 N4 C17 110.4(5) . . ? 
C21 N4 C17 69.6(5) 3_577 . ? 
C19 N4 C17 67.7(5) 3_577 . ? 
C19 N4 C17 112.3(5) . . ? 
C21 N4 C17 69.6(5) . 3_577 ? 
C21 N4 C17 110.4(5) 3_577 3_577 ? 
C19 N4 C17 112.3(5) 3_577 3_577 ? 
C19 N4 C17 67.7(5) . 3_577 ? 
C17 N4 C17 180.000(5) . 3_577 ? 
C21 N4 C22 68.1(5) . 3_577 ? 
C21 N4 C22 111.9(5) 3_577 3_577 ? 
C19 N4 C22 110.7(5) 3_577 3_577 ? 
C19 N4 C22 69.3(5) . 3_577 ? 
C17 N4 C22 76.8(5) . 3_577 ? 
C17 N4 C22 103.2(5) 3_577 3_577 ? 
C21 N4 C22 111.9(5) . . ? 
C21 N4 C22 68.1(5) 3_577 . ? 
C19 N4 C22 69.3(5) 3_577 . ? 
C19 N4 C22 110.7(5) . . ? 
C17 N4 C22 103.2(5) . . ? 
C17 N4 C22 76.8(5) 3_577 . ? 
C22 N4 C22 180.000(4) 3_577 . ? 
N4 C17 C18 106.7(5) . . ? 
N4 C17 H17A 110.4 . . ? 
C18 C17 H17A 110.4 . . ? 
N4 C17 H17B 110.4 . . ? 
C18 C17 H17B 110.4 . . ? 
H17A C17 H17B 108.6 . . ? 
C22 C18 C17 70.0(4) 3_577 . ? 
C22 C18 H18A 178.5 3_577 . ? 
C17 C18 H18A 108.5 . . ? 
C22 C18 H18B 70.8 3_577 . ? 
C17 C18 H18B 110.0 . . ? 
H18A C18 H18B 109.5 . . ? 
C22 C18 H18C 71.7 3_577 . ? 
C17 C18 H18C 109.9 . . ? 
H18A C18 H18C 109.5 . . ? 
H18B C18 H18C 109.5 . . ? 
C22 C18 H18D 110.7 3_577 . ? 
C17 C18 H18D 179.2 . . ? 
H18A C18 H18D 70.7 . . ? 
H18B C18 H18D 70.5 . . ? 
H18C C18 H18D 70.4 . . ? 
C22 C18 H18E 108.7 3_577 . ? 
C17 C18 H18E 70.2 . . ? 
H18A C18 H18E 70.1 . . ? 
H18B C18 H18E 70.9 . . ? 
H18C C18 H18E 179.5 . . ? 
H18D C18 H18E 109.5 . . ? 
C22 C18 H18F 108.9 3_577 . ? 
C17 C18 H18F 70.1 . . ? 
H18A C18 H18F 70.8 . . ? 
H18B C18 H18F 179.6 . . ? 
H18C C18 H18F 70.2 . . ? 
H18D C18 H18F 109.5 . . ? 
H18E C18 H18F 109.5 . . ? 
N4 C19 C20 111.0(5) . . ? 
N4 C19 H19A 109.4 . . ? 
C20 C19 H19A 109.4 . . ? 
N4 C19 H19B 109.4 . . ? 
C20 C19 H19B 109.4 . . ? 
H19A C19 H19B 108.0 . . ? 
C19 C20 C21 66.0(5) . 3_577 ? 
C19 C20 H20A 109.1 . . ? 
C21 C20 H20A 175.0 3_577 . ? 
C19 C20 H20B 109.5 . . ? 
C21 C20 H20B 72.1 3_577 . ? 
H20A C20 H20B 109.5 . . ? 
C19 C20 H20C 109.8 . . ? 
C21 C20 H20C 74.0 3_577 . ? 
H20A C20 H20C 109.5 . . ? 
H20B C20 H20C 109.5 . . ? 
C19 C20 H20D 176.2 . . ? 
C21 C20 H20D 110.2 3_577 . ? 
H20A C20 H20D 74.7 . . ? 
H20B C20 H20D 68.3 . . ? 
H20C C20 H20D 68.7 . . ? 
C19 C20 H20E 72.2 . . ? 
C21 C20 H20E 109.0 3_577 . ? 
H20A C20 H20E 67.6 . . ? 
H20B C20 H20E 71.5 . . ? 
H20C C20 H20E 177.0 . . ? 
H20D C20 H20E 109.5 . . ? 
C19 C20 H20F 72.8 . . ? 
C21 C20 H20F 109.2 3_577 . ? 
H20A C20 H20F 69.4 . . ? 
H20B C20 H20F 177.7 . . ? 
H20C C20 H20F 69.4 . . ? 
H20D C20 H20F 109.5 . . ? 
H20E C20 H20F 109.5 . . ? 
N4 C21 C20 111.3(6) . 3_577 ? 
N4 C21 H21A 109.4 . . ? 
C20 C21 H21A 109.4 3_577 . ? 
N4 C21 H21B 109.4 . . ? 
C20 C21 H21B 109.4 3_577 . ? 
H21A C21 H21B 108.0 . . ? 
N4 C22 C18 106.5(6) . 3_577 ? 
N4 C22 H22A 110.4 . . ? 
C18 C22 H22A 110.4 3_577 . ? 
N4 C22 H22B 110.4 . . ? 
C18 C22 H22B 110.4 3_577 . ? 
H22A C22 H22B 108.6 . . ? 
C25 N5 C25 180.0(17) 3_666 . ? 
C25 N5 C27 119.1(8) 3_666 3_666 ? 
C25 N5 C27 60.9(8) . 3_666 ? 
C25 N5 C27 60.9(8) 3_666 . ? 
C25 N5 C27 119.1(8) . . ? 
C27 N5 C27 180.0(3) 3_666 . ? 
C25 N5 C23 116.6(8) 3_666 3_666 ? 
C25 N5 C23 63.4(8) . 3_666 ? 
C27 N5 C23 107.2(6) 3_666 3_666 ? 
C27 N5 C23 72.8(6) . 3_666 ? 
C25 N5 C23 63.4(8) 3_666 . ? 
C25 N5 C23 116.6(8) . . ? 
C27 N5 C23 72.8(6) 3_666 . ? 
C27 N5 C23 107.2(6) . . ? 
C23 N5 C23 180.000(3) 3_666 . ? 
C25 N5 C28 77.3(8) 3_666 . ? 
C25 N5 C28 102.7(8) . . ? 
C27 N5 C28 71.8(7) 3_666 . ? 
C27 N5 C28 108.2(7) . . ? 
C23 N5 C28 78.8(7) 3_666 . ? 
C23 N5 C28 101.2(7) . . ? 
C25 N5 C28 102.7(8) 3_666 3_666 ? 
C25 N5 C28 77.3(8) . 3_666 ? 
C27 N5 C28 108.2(7) 3_666 3_666 ? 
C27 N5 C28 71.8(7) . 3_666 ? 
C23 N5 C28 101.2(7) 3_666 3_666 ? 
C23 N5 C28 78.8(7) . 3_666 ? 
C28 N5 C28 180.000(3) . 3_666 ? 
C24 C23 N5 111.0(7) . . ? 
C24 C23 H23A 109.4 . . ? 
N5 C23 H23A 109.4 . . ? 
C24 C23 H23B 109.4 . . ? 
N5 C23 H23B 109.4 . . ? 
H23A C23 H23B 108.0 . . ? 
C24 C23 H24E 37.8 . . ? 
N5 C23 H24E 129.3 . . ? 
H23A C23 H24E 71.9 . . ? 
H23B C23 H24E 118.3 . . ? 
C24 C23 H24F 36.3 . . ? 
N5 C23 H24F 120.8 . . ? 
H23A C23 H24F 126.2 . . ? 
H23B C23 H24F 73.4 . . ? 
H24E C23 H24F 62.4 . . ? 
C23 C24 C27 67.6(6) . 3_666 ? 
C23 C24 H24A 108.2 . . ? 
C27 C24 H24A 174.9 3_666 . ? 
C23 C24 H24B 110.9 . . ? 
C27 C24 H24B 70.4 3_666 . ? 
H24A C24 H24B 109.5 . . ? 
C23 C24 H24C 109.3 . . ? 
C27 C24 H24C 75.1 3_666 . ? 
H24A C24 H24C 109.5 . . ? 
H24B C24 H24C 109.5 . . ? 
C23 C24 H24D 175.2 . . ? 
C27 C24 H24D 110.2 3_666 . ? 
H24A C24 H24D 73.8 . . ? 
H24B C24 H24D 64.4 . . ? 
H24C C24 H24D 73.6 . . ? 
C23 C24 H24E 68.1 . . ? 
C27 C24 H24E 109.5 3_666 . ? 
H24A C24 H24E 65.7 . . ? 
H24B C24 H24E 77.9 . . ? 
H24C C24 H24E 172.5 . . ? 
H24D C24 H24E 109.5 . . ? 
C23 C24 H24F 75.3 . . ? 
C27 C24 H24F 108.7 3_666 . ? 
H24A C24 H24F 72.2 . . ? 
H24B C24 H24F 172.1 . . ? 
H24C C24 H24F 63.1 . . ? 
H24D C24 H24F 109.5 . . ? 
H24E C24 H24F 109.5 . . ? 
N5 C25 C26 107.0(9) . . ? 
N5 C25 H25A 110.3 . . ? 
C26 C25 H25A 110.3 . . ? 
N5 C25 H25B 110.3 . . ? 
C26 C25 H25B 110.3 . . ? 
H25A C25 H25B 108.6 . . ? 
C28 C26 C25 73.7(8) 3_666 . ? 
C28 C26 H26A 173.3 3_666 . ? 
C25 C26 H26A 108.8 . . ? 
C28 C26 H26B 63.9 3_666 . ? 
C25 C26 H26B 108.9 . . ? 
H26A C26 H26B 109.5 . . ? 
C28 C26 H26C 74.7 3_666 . ? 
C25 C26 H26C 110.7 . . ? 
H26A C26 H26C 109.5 . . ? 
H26B C26 H26C 109.5 . . ? 
C28 C26 H26D 110.4 3_666 . ? 
C25 C26 H26D 174.2 . . ? 
H26A C26 H26D 66.7 . . ? 
H26B C26 H26D 70.3 . . ? 
H26C C26 H26D 74.7 . . ? 
C28 C26 H26E 108.7 3_666 . ? 
C25 C26 H26E 64.9 . . ? 
H26A C26 H26E 67.8 . . ? 
H26B C26 H26E 77.9 . . ? 
H26C C26 H26E 172.6 . . ? 
H26D C26 H26E 109.5 . . ? 
C28 C26 H26F 109.4 3_666 . ? 
C25 C26 H26F 72.2 . . ? 
H26A C26 H26F 77.3 . . ? 
H26B C26 H26F 171.8 . . ? 
H26C C26 H26F 63.1 . . ? 
H26D C26 H26F 109.5 . . ? 
H26E C26 H26F 109.5 . . ? 
N5 C27 C24 108.3(8) . 3_666 ? 
N5 C27 H27A 110.0 . . ? 
C24 C27 H27A 110.0 3_666 . ? 
N5 C27 H27B 110.0 . . ? 
C24 C27 H27B 110.0 3_666 . ? 
H27A C27 H27B 108.4 . . ? 
C26 C28 N5 101.7(8) 3_666 . ? 
C26 C28 H28A 111.4 3_666 . ? 
N5 C28 H28A 111.4 . . ? 
C26 C28 H28B 111.4 3_666 . ? 
N5 C28 H28B 111.4 . . ? 
H28A C28 H28B 109.3 . . ? 
 
loop_ 
 _geom_torsion_atom_site_label_1 
 _geom_torsion_atom_site_label_2 
 _geom_torsion_atom_site_label_3 
 _geom_torsion_atom_site_label_4 
 _geom_torsion 
 _geom_torsion_site_symmetry_1 
 _geom_torsion_site_symmetry_2 
 _geom_torsion_site_symmetry_3 
 _geom_torsion_site_symmetry_4 
 _geom_torsion_publ_flag 
N1 Fe1 Fe2 N2 -170.57(17) . . . . ? 
Cl1 Fe1 Fe2 N2 -84.44(13) . . . . ? 
S1 Fe1 Fe2 N2 94.79(13) . . . . ? 
Fe4 Fe1 Fe2 N2 56.69(12) . . . . ? 
Fe3 Fe1 Fe2 N2 133.00(12) . . . . ? 
N2 Fe1 Fe2 N1 170.57(17) . . . . ? 
Cl1 Fe1 Fe2 N1 86.13(13) . . . . ? 
S1 Fe1 Fe2 N1 -94.64(12) . . . . ? 
Fe4 Fe1 Fe2 N1 -132.74(12) . . . . ? 
Fe3 Fe1 Fe2 N1 -56.43(12) . . . . ? 
N2 Fe1 Fe2 Cl2 81.23(13) . . . . ? 
N1 Fe1 Fe2 Cl2 -89.34(13) . . . . ? 
Cl1 Fe1 Fe2 Cl2 -3.21(9) . . . . ? 
S1 Fe1 Fe2 Cl2 176.01(6) . . . . ? 
Fe4 Fe1 Fe2 Cl2 137.92(6) . . . . ? 
Fe3 Fe1 Fe2 Cl2 -145.77(6) . . . . ? 
N2 Fe1 Fe2 S2 -95.01(12) . . . . ? 
N1 Fe1 Fe2 S2 94.42(12) . . . . ? 
Cl1 Fe1 Fe2 S2 -179.45(6) . . . . ? 
S1 Fe1 Fe2 S2 -0.22(5) . . . . ? 
Fe4 Fe1 Fe2 S2 -38.32(3) . . . . ? 
Fe3 Fe1 Fe2 S2 38.00(3) . . . . ? 
N2 Fe1 Fe2 Fe4 -56.69(12) . . . . ? 
N1 Fe1 Fe2 Fe4 132.74(12) . . . . ? 
Cl1 Fe1 Fe2 Fe4 -141.13(6) . . . . ? 
S1 Fe1 Fe2 Fe4 38.10(3) . . . . ? 
Fe3 Fe1 Fe2 Fe4 76.31(2) . . . . ? 
N2 Fe1 Fe2 Fe3 -133.00(12) . . . . ? 
N1 Fe1 Fe2 Fe3 56.43(12) . . . . ? 
Cl1 Fe1 Fe2 Fe3 142.56(6) . . . . ? 
S1 Fe1 Fe2 Fe3 -38.22(3) . . . . ? 
Fe4 Fe1 Fe2 Fe3 -76.31(2) . . . . ? 
N2 Fe2 Fe3 N1 -90.97(15) . . . . ? 
Cl2 Fe2 Fe3 N1 81.70(14) . . . . ? 
S2 Fe2 Fe3 N1 168.24(13) . . . . ? 
Fe4 Fe2 Fe3 N1 -126.62(12) . . . . ? 
Fe1 Fe2 Fe3 N1 -58.30(12) . . . . ? 
N2 Fe2 Fe3 Cl3 -174.44(11) . . . . ? 
N1 Fe2 Fe3 Cl3 -83.47(14) . . . . ? 
Cl2 Fe2 Fe3 Cl3 -1.76(11) . . . . ? 
S2 Fe2 Fe3 Cl3 84.77(8) . . . . ? 
Fe4 Fe2 Fe3 Cl3 149.92(8) . . . . ? 
Fe1 Fe2 Fe3 Cl3 -141.76(8) . . . . ? 
N2 Fe2 Fe3 S1 4.76(9) . . . . ? 
N1 Fe2 Fe3 S1 95.74(12) . . . . ? 
Cl2 Fe2 Fe3 S1 177.44(7) . . . . ? 
S2 Fe2 Fe3 S1 -96.03(5) . . . . ? 
Fe4 Fe2 Fe3 S1 -30.88(3) . . . . ? 
Fe1 Fe2 Fe3 S1 37.44(3) . . . . ? 
N2 Fe2 Fe3 S2 100.79(9) . . . . ? 
N1 Fe2 Fe3 S2 -168.24(13) . . . . ? 
Cl2 Fe2 Fe3 S2 -86.53(8) . . . . ? 
Fe4 Fe2 Fe3 S2 65.15(4) . . . . ? 
Fe1 Fe2 Fe3 S2 133.47(4) . . . . ? 
N2 Fe2 Fe3 Fe1 -32.67(9) . . . . ? 
N1 Fe2 Fe3 Fe1 58.30(12) . . . . ? 
Cl2 Fe2 Fe3 Fe1 140.00(7) . . . . ? 
S2 Fe2 Fe3 Fe1 -133.47(4) . . . . ? 
Fe4 Fe2 Fe3 Fe1 -68.32(2) . . . . ? 
N2 Fe2 Fe3 Fe4 35.64(9) . . . . ? 
N1 Fe2 Fe3 Fe4 126.62(12) . . . . ? 
Cl2 Fe2 Fe3 Fe4 -151.68(8) . . . . ? 
S2 Fe2 Fe3 Fe4 -65.15(4) . . . . ? 
Fe1 Fe2 Fe3 Fe4 68.32(2) . . . . ? 
N2 Fe1 Fe3 N1 91.14(15) . . . . ? 
Cl1 Fe1 Fe3 N1 -78.99(13) . . . . ? 
S1 Fe1 Fe3 N1 -168.43(12) . . . . ? 
Fe4 Fe1 Fe3 N1 126.49(12) . . . . ? 
Fe2 Fe1 Fe3 N1 58.63(12) . . . . ? 
N2 Fe1 Fe3 Cl3 176.20(11) . . . . ? 
N1 Fe1 Fe3 Cl3 85.07(14) . . . . ? 
Cl1 Fe1 Fe3 Cl3 6.08(11) . . . . ? 
S1 Fe1 Fe3 Cl3 -83.36(8) . . . . ? 
Fe4 Fe1 Fe3 Cl3 -148.44(7) . . . . ? 
Fe2 Fe1 Fe3 Cl3 143.70(7) . . . . ? 
N2 Fe1 Fe3 S1 -100.44(9) . . . . ? 
N1 Fe1 Fe3 S1 168.43(12) . . . . ? 
Cl1 Fe1 Fe3 S1 89.44(7) . . . . ? 
Fe4 Fe1 Fe3 S1 -65.09(4) . . . . ? 
Fe2 Fe1 Fe3 S1 -132.94(4) . . . . ? 
N2 Fe1 Fe3 S2 -4.64(9) . . . . ? 
N1 Fe1 Fe3 S2 -95.78(12) . . . . ? 
Cl1 Fe1 Fe3 S2 -174.76(7) . . . . ? 
S1 Fe1 Fe3 S2 95.80(5) . . . . ? 
Fe4 Fe1 Fe3 S2 30.71(3) . . . . ? 
Fe2 Fe1 Fe3 S2 -37.14(3) . . . . ? 
N2 Fe1 Fe3 Fe2 32.51(9) . . . . ? 
N1 Fe1 Fe3 Fe2 -58.63(12) . . . . ? 
Cl1 Fe1 Fe3 Fe2 -137.62(7) . . . . ? 
S1 Fe1 Fe3 Fe2 132.94(4) . . . . ? 
Fe4 Fe1 Fe3 Fe2 67.86(2) . . . . ? 
N2 Fe1 Fe3 Fe4 -35.35(9) . . . . ? 
N1 Fe1 Fe3 Fe4 -126.49(12) . . . . ? 
Cl1 Fe1 Fe3 Fe4 154.52(7) . . . . ? 
S1 Fe1 Fe3 Fe4 65.09(4) . . . . ? 
Fe2 Fe1 Fe3 Fe4 -67.86(2) . . . . ? 
N1 Fe2 Fe4 N2 91.08(15) . . . . ? 
Cl2 Fe2 Fe4 N2 -78.53(13) . . . . ? 
S2 Fe2 Fe4 N2 -168.58(12) . . . . ? 
Fe3 Fe2 Fe4 N2 126.57(12) . . . . ? 
Fe1 Fe2 Fe4 N2 58.23(12) . . . . ? 
N2 Fe2 Fe4 Cl4 84.30(14) . . . . ? 
N1 Fe2 Fe4 Cl4 175.39(11) . . . . ? 
Cl2 Fe2 Fe4 Cl4 5.77(11) . . . . ? 
S2 Fe2 Fe4 Cl4 -84.28(8) . . . . ? 
Fe3 Fe2 Fe4 Cl4 -149.13(7) . . . . ? 
Fe1 Fe2 Fe4 Cl4 142.54(7) . . . . ? 
N2 Fe2 Fe4 S2 168.58(12) . . . . ? 
N1 Fe2 Fe4 S2 -100.33(10) . . . . ? 
Cl2 Fe2 Fe4 S2 90.05(7) . . . . ? 
Fe3 Fe2 Fe4 S2 -64.84(4) . . . . ? 
Fe1 Fe2 Fe4 S2 -133.18(4) . . . . ? 
N2 Fe2 Fe4 S1 -95.63(12) . . . . ? 
N1 Fe2 Fe4 S1 -4.55(10) . . . . ? 
Cl2 Fe2 Fe4 S1 -174.16(7) . . . . ? 
S2 Fe2 Fe4 S1 95.79(5) . . . . ? 
Fe3 Fe2 Fe4 S1 30.94(3) . . . . ? 
Fe1 Fe2 Fe4 S1 -37.40(3) . . . . ? 
N2 Fe2 Fe4 Fe1 -58.23(12) . . . . ? 
N1 Fe2 Fe4 Fe1 32.85(9) . . . . ? 
Cl2 Fe2 Fe4 Fe1 -136.76(7) . . . . ? 
S2 Fe2 Fe4 Fe1 133.18(4) . . . . ? 
Fe3 Fe2 Fe4 Fe1 68.34(2) . . . . ? 
N2 Fe2 Fe4 Fe3 -126.57(12) . . . . ? 
N1 Fe2 Fe4 Fe3 -35.49(9) . . . . ? 
Cl2 Fe2 Fe4 Fe3 154.90(7) . . . . ? 
S2 Fe2 Fe4 Fe3 64.84(4) . . . . ? 
Fe1 Fe2 Fe4 Fe3 -68.34(2) . . . . ? 
N1 Fe1 Fe4 N2 -91.23(15) . . . . ? 
Cl1 Fe1 Fe4 N2 78.38(14) . . . . ? 
S1 Fe1 Fe4 N2 168.46(13) . . . . ? 
Fe3 Fe1 Fe4 N2 -126.71(12) . . . . ? 
Fe2 Fe1 Fe4 N2 -58.31(12) . . . . ? 
N2 Fe1 Fe4 Cl4 -83.14(14) . . . . ? 
N1 Fe1 Fe4 Cl4 -174.37(11) . . . . ? 
Cl1 Fe1 Fe4 Cl4 -4.76(11) . . . . ? 
S1 Fe1 Fe4 Cl4 85.32(8) . . . . ? 
Fe3 Fe1 Fe4 Cl4 150.15(7) . . . . ? 
Fe2 Fe1 Fe4 Cl4 -141.45(7) . . . . ? 
N2 Fe1 Fe4 S2 95.90(13) . . . . ? 
N1 Fe1 Fe4 S2 4.67(9) . . . . ? 
Cl1 Fe1 Fe4 S2 174.28(7) . . . . ? 
S1 Fe1 Fe4 S2 -95.65(5) . . . . ? 
Fe3 Fe1 Fe4 S2 -30.81(3) . . . . ? 
Fe2 Fe1 Fe4 S2 37.59(3) . . . . ? 
N2 Fe1 Fe4 S1 -168.46(13) . . . . ? 
N1 Fe1 Fe4 S1 100.32(9) . . . . ? 
Cl1 Fe1 Fe4 S1 -90.07(7) . . . . ? 
Fe3 Fe1 Fe4 S1 64.83(4) . . . . ? 
Fe2 Fe1 Fe4 S1 133.23(4) . . . . ? 
N2 Fe1 Fe4 Fe2 58.31(12) . . . . ? 
N1 Fe1 Fe4 Fe2 -32.92(9) . . . . ? 
Cl1 Fe1 Fe4 Fe2 136.69(7) . . . . ? 
S1 Fe1 Fe4 Fe2 -133.23(4) . . . . ? 
Fe3 Fe1 Fe4 Fe2 -68.40(2) . . . . ? 
N2 Fe1 Fe4 Fe3 126.71(12) . . . . ? 
N1 Fe1 Fe4 Fe3 35.48(8) . . . . ? 
Cl1 Fe1 Fe4 Fe3 -154.91(7) . . . . ? 
S1 Fe1 Fe4 Fe3 -64.83(4) . . . . ? 
Fe2 Fe1 Fe4 Fe3 68.40(2) . . . . ? 
N1 Fe3 Fe4 N2 -0.02(13) . . . . ? 
Cl3 Fe3 Fe4 N2 178.06(12) . . . . ? 
S1 Fe3 Fe4 N2 104.11(10) . . . . ? 
S2 Fe3 Fe4 N2 -104.47(10) . . . . ? 
Fe2 Fe3 Fe4 N2 -36.95(9) . . . . ? 
Fe1 Fe3 Fe4 N2 36.84(9) . . . . ? 
N1 Fe3 Fe4 Cl4 178.86(11) . . . . ? 
Cl3 Fe3 Fe4 Cl4 -3.06(12) . . . . ? 
S1 Fe3 Fe4 Cl4 -77.02(8) . . . . ? 
S2 Fe3 Fe4 Cl4 74.41(8) . . . . ? 
Fe2 Fe3 Fe4 Cl4 141.92(8) . . . . ? 
Fe1 Fe3 Fe4 Cl4 -144.28(8) . . . . ? 
N1 Fe3 Fe4 S2 104.45(10) . . . . ? 
Cl3 Fe3 Fe4 S2 -77.47(9) . . . . ? 
S1 Fe3 Fe4 S2 -151.42(5) . . . . ? 
Fe2 Fe3 Fe4 S2 67.52(4) . . . . ? 
Fe1 Fe3 Fe4 S2 141.31(4) . . . . ? 
N1 Fe3 Fe4 S1 -104.12(10) . . . . ? 
Cl3 Fe3 Fe4 S1 73.96(9) . . . . ? 
S2 Fe3 Fe4 S1 151.42(5) . . . . ? 
Fe2 Fe3 Fe4 S1 -141.06(4) . . . . ? 
Fe1 Fe3 Fe4 S1 -67.27(4) . . . . ? 
N1 Fe3 Fe4 Fe2 36.94(9) . . . . ? 
Cl3 Fe3 Fe4 Fe2 -144.98(8) . . . . ? 
S1 Fe3 Fe4 Fe2 141.06(4) . . . . ? 
S2 Fe3 Fe4 Fe2 -67.52(4) . . . . ? 
Fe1 Fe3 Fe4 Fe2 73.79(2) . . . . ? 
N1 Fe3 Fe4 Fe1 -36.86(9) . . . . ? 
Cl3 Fe3 Fe4 Fe1 141.22(8) . . . . ? 
S1 Fe3 Fe4 Fe1 67.27(4) . . . . ? 
S2 Fe3 Fe4 Fe1 -141.31(4) . . . . ? 
Fe2 Fe3 Fe4 Fe1 -73.79(2) . . . . ? 
N2 Fe1 S1 Fe3 88.15(9) . . . . ? 
N1 Fe1 S1 Fe3 -8.46(9) . . . . ? 
Cl1 Fe1 S1 Fe3 -140.49(4) . . . . ? 
Fe4 Fe1 S1 Fe3 79.71(3) . . . . ? 
Fe2 Fe1 S1 Fe3 40.06(3) . . . . ? 
N2 Fe1 S1 Fe4 8.44(9) . . . . ? 
N1 Fe1 S1 Fe4 -88.17(9) . . . . ? 
Cl1 Fe1 S1 Fe4 139.80(4) . . . . ? 
Fe3 Fe1 S1 Fe4 -79.71(3) . . . . ? 
Fe2 Fe1 S1 Fe4 -39.65(3) . . . . ? 
N1 Fe3 S1 Fe1 8.80(9) . . . . ? 
Cl3 Fe3 S1 Fe1 138.71(5) . . . . ? 
S2 Fe3 S1 Fe1 -96.50(4) . . . . ? 
Fe2 Fe3 S1 Fe1 -40.78(3) . . . . ? 
Fe4 Fe3 S1 Fe1 -73.53(3) . . . . ? 
N1 Fe3 S1 Fe4 82.32(9) . . . . ? 
Cl3 Fe3 S1 Fe4 -147.76(5) . . . . ? 
S2 Fe3 S1 Fe4 -22.97(4) . . . . ? 
Fe2 Fe3 S1 Fe4 32.75(3) . . . . ? 
Fe1 Fe3 S1 Fe4 73.53(3) . . . . ? 
N2 Fe4 S1 Fe1 -8.81(10) . . . . ? 
Cl4 Fe4 S1 Fe1 -139.13(5) . . . . ? 
S2 Fe4 S1 Fe1 96.94(4) . . . . ? 
Fe2 Fe4 S1 Fe1 40.83(3) . . . . ? 
Fe3 Fe4 S1 Fe1 73.93(3) . . . . ? 
N2 Fe4 S1 Fe3 -82.73(10) . . . . ? 
Cl4 Fe4 S1 Fe3 146.95(5) . . . . ? 
S2 Fe4 S1 Fe3 23.02(4) . . . . ? 
Fe2 Fe4 S1 Fe3 -33.10(3) . . . . ? 
Fe1 Fe4 S1 Fe3 -73.93(3) . . . . ? 
N2 Fe2 S2 Fe4 -8.40(9) . . . . ? 
N1 Fe2 S2 Fe4 88.47(9) . . . . ? 
Cl2 Fe2 S2 Fe4 -137.36(4) . . . . ? 
Fe3 Fe2 S2 Fe4 79.86(3) . . . . ? 
Fe1 Fe2 S2 Fe4 40.04(3) . . . . ? 
N2 Fe2 S2 Fe3 -88.26(9) . . . . ? 
N1 Fe2 S2 Fe3 8.62(9) . . . . ? 
Cl2 Fe2 S2 Fe3 142.79(4) . . . . ? 
Fe4 Fe2 S2 Fe3 -79.86(3) . . . . ? 
Fe1 Fe2 S2 Fe3 -39.82(3) . . . . ? 
N2 Fe4 S2 Fe2 8.73(9) . . . . ? 
Cl4 Fe4 S2 Fe2 138.48(5) . . . . ? 
S1 Fe4 S2 Fe2 -96.79(4) . . . . ? 
Fe1 Fe4 S2 Fe2 -40.90(3) . . . . ? 
Fe3 Fe4 S2 Fe2 -73.80(3) . . . . ? 
N2 Fe4 S2 Fe3 82.53(9) . . . . ? 
Cl4 Fe4 S2 Fe3 -147.72(5) . . . . ? 
S1 Fe4 S2 Fe3 -22.99(4) . . . . ? 
Fe2 Fe4 S2 Fe3 73.80(3) . . . . ? 
Fe1 Fe4 S2 Fe3 32.90(3) . . . . ? 
N1 Fe3 S2 Fe2 -8.98(10) . . . . ? 
Cl3 Fe3 S2 Fe2 -140.15(5) . . . . ? 
S1 Fe3 S2 Fe2 96.11(4) . . . . ? 
Fe1 Fe3 S2 Fe2 40.42(3) . . . . ? 
Fe4 Fe3 S2 Fe2 73.12(3) . . . . ? 
N1 Fe3 S2 Fe4 -82.11(10) . . . . ? 
Cl3 Fe3 S2 Fe4 146.73(5) . . . . ? 
S1 Fe3 S2 Fe4 22.99(4) . . . . ? 
Fe2 Fe3 S2 Fe4 -73.12(3) . . . . ? 
Fe1 Fe3 S2 Fe4 -32.71(3) . . . . ? 
Cl3 Fe3 N1 C1 2.5(3) . . . . ? 
S1 Fe3 N1 C1 128.9(3) . . . . ? 
S2 Fe3 N1 C1 -126.3(3) . . . . ? 
Fe2 Fe3 N1 C1 -136.1(3) . . . . ? 
Fe1 Fe3 N1 C1 138.5(3) . . . . ? 
Fe4 Fe3 N1 C1 -178.6(3) . . . . ? 
Cl3 Fe3 N1 Fe1 -136.03(7) . . . . ? 
S1 Fe3 N1 Fe1 -9.60(10) . . . . ? 
S2 Fe3 N1 Fe1 95.21(9) . . . . ? 
Fe2 Fe3 N1 Fe1 85.44(11) . . . . ? 
Fe4 Fe3 N1 Fe1 42.85(8) . . . . ? 
Cl3 Fe3 N1 Fe2 138.53(7) . . . . ? 
S1 Fe3 N1 Fe2 -95.04(9) . . . . ? 
S2 Fe3 N1 Fe2 9.78(10) . . . . ? 
Fe1 Fe3 N1 Fe2 -85.44(11) . . . . ? 
Fe4 Fe3 N1 Fe2 -42.59(8) . . . . ? 
N2 Fe1 N1 C1 126.8(3) . . . . ? 
Cl1 Fe1 N1 C1 -0.2(3) . . . . ? 
S1 Fe1 N1 C1 -130.7(3) . . . . ? 
Fe4 Fe1 N1 C1 173.0(3) . . . . ? 
Fe3 Fe1 N1 C1 -140.5(3) . . . . ? 
Fe2 Fe1 N1 C1 133.8(3) . . . . ? 
N2 Fe1 N1 Fe3 -92.68(12) . . . . ? 
Cl1 Fe1 N1 Fe3 140.29(7) . . . . ? 
S1 Fe1 N1 Fe3 9.75(10) . . . . ? 
Fe4 Fe1 N1 Fe3 -46.56(9) . . . . ? 
Fe2 Fe1 N1 Fe3 -85.78(12) . . . . ? 
N2 Fe1 N1 Fe2 -6.91(13) . . . . ? 
Cl1 Fe1 N1 Fe2 -133.94(7) . . . . ? 
S1 Fe1 N1 Fe2 95.52(9) . . . . ? 
Fe4 Fe1 N1 Fe2 39.22(9) . . . . ? 
Fe3 Fe1 N1 Fe2 85.78(12) . . . . ? 
N2 Fe2 N1 C1 -127.9(3) . . . . ? 
Cl2 Fe2 N1 C1 -1.7(3) . . . . ? 
S2 Fe2 N1 C1 129.2(3) . . . . ? 
Fe4 Fe2 N1 C1 -174.3(3) . . . . ? 
Fe3 Fe2 N1 C1 139.1(3) . . . . ? 
Fe1 Fe2 N1 C1 -134.8(3) . . . . ? 
N2 Fe2 N1 Fe3 93.05(12) . . . . ? 
Cl2 Fe2 N1 Fe3 -140.79(7) . . . . ? 
S2 Fe2 N1 Fe3 -9.93(10) . . . . ? 
Fe4 Fe2 N1 Fe3 46.61(9) . . . . ? 
Fe1 Fe2 N1 Fe3 86.11(11) . . . . ? 
N2 Fe2 N1 Fe1 6.94(13) . . . . ? 
Cl2 Fe2 N1 Fe1 133.11(7) . . . . ? 
S2 Fe2 N1 Fe1 -96.04(9) . . . . ? 
Fe4 Fe2 N1 Fe1 -39.50(9) . . . . ? 
Fe3 Fe2 N1 Fe1 -86.11(11) . . . . ? 
Fe3 N1 C1 C2 60.8(4) . . . . ? 
Fe1 N1 C1 C2 -176.1(2) . . . . ? 
Fe2 N1 C1 C2 -59.7(4) . . . . ? 
Fe3 N1 C1 C4 -179.1(3) . . . . ? 
Fe1 N1 C1 C4 -56.0(4) . . . . ? 
Fe2 N1 C1 C4 60.4(4) . . . . ? 
Fe3 N1 C1 C3 -59.9(4) . . . . ? 
Fe1 N1 C1 C3 63.2(4) . . . . ? 
Fe2 N1 C1 C3 179.6(3) . . . . ? 
Cl4 Fe4 N2 C5 0.7(3) . . . . ? 
S2 Fe4 N2 C5 127.5(3) . . . . ? 
S1 Fe4 N2 C5 -127.4(3) . . . . ? 
Fe2 Fe4 N2 C5 137.0(3) . . . . ? 
Fe1 Fe4 N2 C5 -137.1(4) . . . . ? 
Fe3 Fe4 N2 C5 -180.0(3) . . . . ? 
Cl4 Fe4 N2 Fe2 -136.33(7) . . . . ? 
S2 Fe4 N2 Fe2 -9.54(10) . . . . ? 
S1 Fe4 N2 Fe2 95.54(9) . . . . ? 
Fe1 Fe4 N2 Fe2 85.94(11) . . . . ? 
Fe3 Fe4 N2 Fe2 43.03(8) . . . . ? 
Cl4 Fe4 N2 Fe1 137.74(7) . . . . ? 
S2 Fe4 N2 Fe1 -95.47(9) . . . . ? 
S1 Fe4 N2 Fe1 9.60(11) . . . . ? 
Fe2 Fe4 N2 Fe1 -85.94(11) . . . . ? 
Fe3 Fe4 N2 Fe1 -42.91(8) . . . . ? 
N1 Fe2 N2 C5 128.2(3) . . . . ? 
Cl2 Fe2 N2 C5 -1.1(3) . . . . ? 
S2 Fe2 N2 C5 -129.3(3) . . . . ? 
Fe4 Fe2 N2 C5 -138.9(3) . . . . ? 
Fe3 Fe2 N2 C5 174.4(3) . . . . ? 
Fe1 Fe2 N2 C5 135.1(3) . . . . ? 
N1 Fe2 N2 Fe4 -92.91(12) . . . . ? 
Cl2 Fe2 N2 Fe4 137.82(7) . . . . ? 
S2 Fe2 N2 Fe4 9.68(10) . . . . ? 
Fe3 Fe2 N2 Fe4 -46.66(9) . . . . ? 
Fe1 Fe2 N2 Fe4 -85.97(11) . . . . ? 
N1 Fe2 N2 Fe1 -6.94(12) . . . . ? 
Cl2 Fe2 N2 Fe1 -136.21(7) . . . . ? 
S2 Fe2 N2 Fe1 95.65(9) . . . . ? 
Fe4 Fe2 N2 Fe1 85.97(11) . . . . ? 
Fe3 Fe2 N2 Fe1 39.31(9) . . . . ? 
N1 Fe1 N2 C5 -128.3(3) . . . . ? 
Cl1 Fe1 N2 C5 -0.9(3) . . . . ? 
S1 Fe1 N2 C5 129.4(3) . . . . ? 
Fe4 Fe1 N2 C5 139.1(3) . . . . ? 
Fe3 Fe1 N2 C5 -174.5(3) . . . . ? 
Fe2 Fe1 N2 C5 -135.3(3) . . . . ? 
N1 Fe1 N2 Fe4 92.55(12) . . . . ? 
Cl1 Fe1 N2 Fe4 -139.98(7) . . . . ? 
S1 Fe1 N2 Fe4 -9.75(11) . . . . ? 
Fe3 Fe1 N2 Fe4 46.39(9) . . . . ? 
Fe2 Fe1 N2 Fe4 85.59(12) . . . . ? 
N1 Fe1 N2 Fe2 6.96(13) . . . . ? 
Cl1 Fe1 N2 Fe2 134.42(7) . . . . ? 
S1 Fe1 N2 Fe2 -95.34(9) . . . . ? 
Fe4 Fe1 N2 Fe2 -85.59(12) . . . . ? 
Fe3 Fe1 N2 Fe2 -39.20(9) . . . . ? 
Fe4 N2 C5 C8 179.8(3) . . . . ? 
Fe2 N2 C5 C8 -59.2(4) . . . . ? 
Fe1 N2 C5 C8 58.5(4) . . . . ? 
Fe4 N2 C5 C6 60.2(4) . . . . ? 
Fe2 N2 C5 C6 -178.9(2) . . . . ? 
Fe1 N2 C5 C6 -61.1(4) . . . . ? 
Fe4 N2 C5 C7 -59.9(4) . . . . ? 
Fe2 N2 C5 C7 61.0(4) . . . . ? 
Fe1 N2 C5 C7 178.8(3) . . . . ? 
C13 N3 C9 C10 174.3(4) . . . . ? 
C11 N3 C9 C10 55.0(5) . . . . ? 
C15 N3 C9 C10 -64.5(5) . . . . ? 
C13 N3 C11 C12 -63.9(4) . . . . ? 
C9 N3 C11 C12 55.3(4) . . . . ? 
C15 N3 C11 C12 174.2(3) . . . . ? 
C9 N3 C13 C14 65.8(4) . . . . ? 
C11 N3 C13 C14 -173.6(3) . . . . ? 
C15 N3 C13 C14 -53.2(4) . . . . ? 
C13 N3 C15 C16 -55.6(5) . . . . ? 
C9 N3 C15 C16 -174.8(4) . . . . ? 
C11 N3 C15 C16 64.6(4) . . . . ? 
C21 N4 C17 C18 -60.4(7) . . . . ? 
C21 N4 C17 C18 119.6(7) 3_577 . . . ? 
C19 N4 C17 C18 -119.5(7) 3_577 . . . ? 
C19 N4 C17 C18 60.5(7) . . . . ? 
C17 N4 C17 C18 107(66) 3_577 . . . ? 
C22 N4 C17 C18 -0.2(6) 3_577 . . . ? 
C22 N4 C17 C18 179.8(6) . . . . ? 
N4 C17 C18 C22 0.2(5) . . . 3_577 ? 
C21 N4 C19 C20 179.4(5) . . . . ? 
C21 N4 C19 C20 -0.6(5) 3_577 . . . ? 
C19 N4 C19 C20 -23(100) 3_577 . . . ? 
C17 N4 C19 C20 57.2(7) . . . . ? 
C17 N4 C19 C20 -122.8(7) 3_577 . . . ? 
C22 N4 C19 C20 122.3(7) 3_577 . . . ? 
C22 N4 C19 C20 -57.7(7) . . . . ? 
N4 C19 C20 C21 0.6(5) . . . 3_577 ? 
C21 N4 C21 C20 10(100) 3_577 . . 3_577 ? 
C19 N4 C21 C20 -0.6(5) 3_577 . . 3_577 ? 
C19 N4 C21 C20 179.4(5) . . . 3_577 ? 
C17 N4 C21 C20 -57.3(7) . . . 3_577 ? 
C17 N4 C21 C20 122.7(7) 3_577 . . 3_577 ? 
C22 N4 C21 C20 -122.9(7) 3_577 . . 3_577 ? 
C22 N4 C21 C20 57.1(7) . . . 3_577 ? 
C21 N4 C22 C18 61.1(7) . . . 3_577 ? 
C21 N4 C22 C18 -118.9(7) 3_577 . . 3_577 ? 
C19 N4 C22 C18 120.3(7) 3_577 . . 3_577 ? 
C19 N4 C22 C18 -59.7(7) . . . 3_577 ? 
C17 N4 C22 C18 179.8(6) . . . 3_577 ? 
C17 N4 C22 C18 -0.2(6) 3_577 . . 3_577 ? 
C22 N4 C22 C18 -125(100) 3_577 . . 3_577 ? 
C25 N5 C23 C24 131.8(13) 3_666 . . . ? 
C25 N5 C23 C24 -48.2(13) . . . . ? 
C27 N5 C23 C24 -4.5(10) 3_666 . . . ? 
C27 N5 C23 C24 175.5(10) . . . . ? 
C23 N5 C23 C24 -173(100) 3_666 . . . ? 
C28 N5 C23 C24 62.3(11) . . . . ? 
C28 N5 C23 C24 -117.7(11) 3_666 . . . ? 
N5 C23 C24 C27 3.9(8) . . . 3_666 ? 
C25 N5 C25 C26 39(18) 3_666 . . . ? 
C27 N5 C25 C26 -123.5(16) 3_666 . . . ? 
C27 N5 C25 C26 56.5(16) . . . . ? 
C23 N5 C25 C26 105.5(13) 3_666 . . . ? 
C23 N5 C25 C26 -74.5(13) . . . . ? 
C28 N5 C25 C26 175.9(11) . . . . ? 
C28 N5 C25 C26 -4.1(11) 3_666 . . . ? 
N5 C25 C26 C28 4.8(13) . . . 3_666 ? 
C25 N5 C27 C24 -139.0(14) 3_666 . . 3_666 ? 
C25 N5 C27 C24 41.0(14) . . . 3_666 ? 
C27 N5 C27 C24 60(100) 3_666 . . 3_666 ? 
C23 N5 C27 C24 -3.9(8) 3_666 . . 3_666 ? 
C23 N5 C27 C24 176.1(8) . . . 3_666 ? 
C28 N5 C27 C24 -75.6(10) . . . 3_666 ? 
C28 N5 C27 C24 104.4(10) 3_666 . . 3_666 ? 
C25 N5 C28 C26 -4.7(13) 3_666 . . 3_666 ? 
C25 N5 C28 C26 175.3(13) . . . 3_666 ? 
C27 N5 C28 C26 122.1(12) 3_666 . . 3_666 ? 
C27 N5 C28 C26 -57.9(12) . . . 3_666 ? 
C23 N5 C28 C26 -125.5(11) 3_666 . . 3_666 ? 
C23 N5 C28 C26 54.5(11) . . . 3_666 ? 
C28 N5 C28 C26 -127(100) 3_666 . . 3_666 ? 
 
_diffrn_measured_fraction_theta_max    0.999 
_diffrn_reflns_theta_full              28.00 
_diffrn_measured_fraction_theta_full   0.999 
_refine_diff_density_max    0.473 
_refine_diff_density_min   -0.483 
_refine_diff_density_rms    0.092 


#===END


 
data_sl31_0ma 
 
_audit_creation_method            SHELXL-97 
_chemical_name_systematic 
; 
 (Et4N)2[Fe4(mu3-NtBu)(mu3-S)3Cl4].(CH3CN) 
; 
_chemical_name_common              
; 
 (Et4N)2[Fe4(mu3-NtBu)(mu3-S)3Cl4].(CH3CN) 
; 
_chemical_melting_point           ? 
_chemical_formula_moiety           
;
(Et4N +)2 [ (Fe 3+)2 (Fe 2+)2 (NtBu 2-) (S 2-)3 (Cl -)4 ].(CH3CN)
; 
_chemical_formula_sum 
 'C22 H52 Cl4 Fe4 N4 S3' 
_chemical_formula_weight          834.06 
 
loop_ 
 _atom_type_symbol 
 _atom_type_description 
 _atom_type_scat_dispersion_real 
 _atom_type_scat_dispersion_imag 
 _atom_type_scat_source 
 'C'  'C'   0.0033   0.0016 
 'International Tables Vol C Tables 4.2.6.8 and 6.1.1.4' 
 'H'  'H'   0.0000   0.0000 
 'International Tables Vol C Tables 4.2.6.8 and 6.1.1.4' 
 'N'  'N'   0.0061   0.0033 
 'International Tables Vol C Tables 4.2.6.8 and 6.1.1.4' 
 'S'  'S'   0.1246   0.1234 
 'International Tables Vol C Tables 4.2.6.8 and 6.1.1.4' 
 'Cl'  'Cl'   0.1484   0.1585 
 'International Tables Vol C Tables 4.2.6.8 and 6.1.1.4' 
 'Fe'  'Fe'   0.3463   0.8444 
 'International Tables Vol C Tables 4.2.6.8 and 6.1.1.4' 
 
_symmetry_cell_setting            'Orthorhombic' 
_symmetry_space_group_name_H-M    'Pca2(1) ' 
 
loop_ 
 _symmetry_equiv_pos_as_xyz 
 'x, y, z' 
 '-x, -y, z+1/2' 
 'x+1/2, -y, z' 
 '-x+1/2, y, z+1/2' 
 
_cell_length_a                    26.4805(11) 
_cell_length_b                    10.7835(4) 
_cell_length_c                    12.7847(5) 
_cell_angle_alpha                 90.00 
_cell_angle_beta                  90.00 
_cell_angle_gamma                 90.00 
_cell_volume                      3650.7(2) 
_cell_formula_units_Z             4 
_cell_measurement_temperature     200(2) 
_cell_measurement_reflns_used     8439 
_cell_measurement_theta_min       2.91 
_cell_measurement_theta_max       28.68 
 
_exptl_crystal_description        'block' 
_exptl_crystal_colour             'black' 
_exptl_crystal_size_max           0.19 
_exptl_crystal_size_mid           0.12 
_exptl_crystal_size_min           0.12 
_exptl_crystal_density_meas       ? 
_exptl_crystal_density_diffrn     1.517 
_exptl_crystal_density_method     'not measured' 
_exptl_crystal_F_000              1728 
_exptl_absorpt_coefficient_mu     2.041 
_exptl_absorpt_correction_type    'empirical' 
_exptl_absorpt_correction_T_min   0.6977 
_exptl_absorpt_correction_T_max   0.7917 
_exptl_absorpt_process_details    'APEX II' 
 
_exptl_special_details 
; 
 ? 
; 
 
_diffrn_ambient_temperature       200(2) 
_diffrn_radiation_wavelength      0.71073 
_diffrn_radiation_type            MoK\a 
_diffrn_radiation_source          'fine-focus sealed tube' 
_diffrn_radiation_monochromator   graphite 
_diffrn_measurement_device_type   'APEX CCD' 
_diffrn_measurement_method        '\w scans' 
_diffrn_detector_area_resol_mean  ? 
_diffrn_standards_number          ? 
_diffrn_standards_interval_count  ? 
_diffrn_standards_interval_time   ? 
_diffrn_standards_decay_%         ? 
_diffrn_reflns_number             32872 
_diffrn_reflns_av_R_equivalents   0.0459 
_diffrn_reflns_av_sigmaI/netI     0.0541 
_diffrn_reflns_limit_h_min        -37 
_diffrn_reflns_limit_h_max        34 
_diffrn_reflns_limit_k_min        -15 
_diffrn_reflns_limit_k_max        15 
_diffrn_reflns_limit_l_min        -16 
_diffrn_reflns_limit_l_max        18 
_diffrn_reflns_theta_min          2.91 
_diffrn_reflns_theta_max          30.05 
_reflns_number_total              10458 
_reflns_number_gt                 9203 
_reflns_threshold_expression      >2sigma(I) 
 
_computing_data_collection      'Bruker APEX2'
_computing_cell_refinement      'Bruker SAINT'
_computing_data_reduction       'Bruker SAINT'  
_computing_structure_solution   'SHELXS-97 (Sheldrick, 2008)'
_computing_structure_refinement 'SHELXL-97 (Sheldrick, 2008)'
_computing_molecular_graphics   'Bruker SHELXTL'
_computing_publication_material 'Bruker SHELXTL'
 
_refine_special_details 
; 
 Refinement of F^2^ against ALL reflections.  The weighted R-factor wR and 
 goodness of fit S are based on F^2^, conventional R-factors R are based 
 on F, with F set to zero for negative F^2^. The threshold expression of 
 F^2^ > 2sigma(F^2^) is used only for calculating R-factors(gt) etc. and is 
 not relevant to the choice of reflections for refinement.  R-factors based 
 on F^2^ are statistically about twice as large as those based on F, and R- 
 factors based on ALL data will be even larger. 
; 
 
_refine_ls_structure_factor_coef  Fsqd  
_refine_ls_matrix_type            full 
_refine_ls_weighting_scheme       calc  
_refine_ls_weighting_details 
 'calc w=1/[\s^2^(Fo^2^)+(0.0287P)^2^+0.7538P] where P=(Fo^2^+2Fc^2^)/3' 
_atom_sites_solution_primary      direct 
_atom_sites_solution_secondary    difmap 
_atom_sites_solution_hydrogens    geom 
_refine_ls_hydrogen_treatment     constr 
_refine_ls_extinction_method      none 
_refine_ls_extinction_coef        ? 
_refine_ls_abs_structure_details 
 'Flack H D (1983), Acta Cryst. A39, 876-881' 
_refine_ls_abs_structure_Flack    0.017(12) 
_refine_ls_number_reflns          10458 
_refine_ls_number_parameters      331 
_refine_ls_number_restraints      1 
_refine_ls_R_factor_all           0.0469 
_refine_ls_R_factor_gt            0.0379 
_refine_ls_wR_factor_ref          0.0889 
_refine_ls_wR_factor_gt           0.0805 
_refine_ls_goodness_of_fit_ref    1.072 
_refine_ls_restrained_S_all       1.072 
_refine_ls_shift/su_max           0.001 
_refine_ls_shift/su_mean          0.000 
 
loop_ 
 _atom_site_label 
 _atom_site_type_symbol 
 _atom_site_fract_x 
 _atom_site_fract_y 
 _atom_site_fract_z 
 _atom_site_U_iso_or_equiv 
 _atom_site_adp_type 
 _atom_site_occupancy 
 _atom_site_symmetry_multiplicity 
 _atom_site_calc_flag 
 _atom_site_refinement_flags 
 _atom_site_disorder_assembly 
 _atom_site_disorder_group 
Fe1 Fe 0.436851(15) 0.19625(4) 0.15950(4) 0.02721(9) Uani 1 1 d . . . 
Fe2 Fe 0.342993(16) 0.08198(4) 0.15200(4) 0.02711(9) Uani 1 1 d . . . 
Fe3 Fe 0.346752(16) 0.32745(4) 0.16581(4) 0.02702(9) Uani 1 1 d . . . 
Fe4 Fe 0.373325(17) 0.21505(4) -0.01079(4) 0.02676(10) Uani 1 1 d . . . 
Cl1 Cl 0.51885(3) 0.18088(9) 0.19741(9) 0.0471(2) Uani 1 1 d . . . 
Cl2 Cl 0.29665(3) -0.08150(8) 0.19985(7) 0.03950(19) Uani 1 1 d . . . 
Cl3 Cl 0.30637(3) 0.49579(8) 0.22270(8) 0.0411(2) Uani 1 1 d . . . 
Cl4 Cl 0.37244(4) 0.24041(12) -0.18269(7) 0.0510(2) Uani 1 1 d . . . 
S1 S 0.37750(3) 0.19209(8) 0.28973(7) 0.03174(17) Uani 1 1 d . . . 
S2 S 0.41769(3) 0.37294(7) 0.06960(6) 0.02857(16) Uani 1 1 d . . . 
S3 S 0.41229(3) 0.03830(7) 0.04933(7) 0.03120(17) Uani 1 1 d . . . 
N1 N 0.31129(9) 0.2137(2) 0.0711(2) 0.0257(5) Uani 1 1 d . . . 
C1 C 0.25897(12) 0.2203(3) 0.0319(3) 0.0342(7) Uani 1 1 d . . . 
C2 C 0.22262(14) 0.2194(4) 0.1247(4) 0.0475(10) Uani 1 1 d . . . 
H2A H 0.2268 0.1421 0.1640 0.071 Uiso 1 1 calc R . . 
H2B H 0.1878 0.2255 0.0991 0.071 Uiso 1 1 calc R . . 
H2C H 0.2300 0.2901 0.1704 0.071 Uiso 1 1 calc R . . 
C3 C 0.25225(15) 0.3410(4) -0.0305(3) 0.0468(9) Uani 1 1 d . . . 
H3A H 0.2584 0.4122 0.0154 0.070 Uiso 1 1 calc R . . 
H3B H 0.2177 0.3453 -0.0580 0.070 Uiso 1 1 calc R . . 
H3C H 0.2763 0.3426 -0.0888 0.070 Uiso 1 1 calc R . . 
C4 C 0.24892(15) 0.1091(4) -0.0394(3) 0.0475(9) Uani 1 1 d . . . 
H4A H 0.2531 0.0322 0.0004 0.071 Uiso 1 1 calc R . . 
H4B H 0.2728 0.1102 -0.0979 0.071 Uiso 1 1 calc R . . 
H4C H 0.2144 0.1137 -0.0665 0.071 Uiso 1 1 calc R . . 
N2 N 0.44399(11) 0.6823(3) 0.3685(2) 0.0320(6) Uani 1 1 d . . . 
C5 C 0.45748(15) 0.6044(4) 0.2734(3) 0.0435(9) Uani 1 1 d . . . 
H5A H 0.4292 0.5470 0.2589 0.052 Uiso 1 1 calc R . . 
H5B H 0.4609 0.6601 0.2123 0.052 Uiso 1 1 calc R . . 
C6 C 0.50550(17) 0.5292(4) 0.2838(4) 0.0571(11) Uani 1 1 d . . . 
H6A H 0.5112 0.4821 0.2194 0.086 Uiso 1 1 calc R . . 
H6B H 0.5023 0.4717 0.3429 0.086 Uiso 1 1 calc R . . 
H6C H 0.5341 0.5851 0.2961 0.086 Uiso 1 1 calc R . . 
C7 C 0.48544(13) 0.7754(3) 0.3924(3) 0.0361(7) Uani 1 1 d . . . 
H7A H 0.4770 0.8180 0.4587 0.043 Uiso 1 1 calc R . . 
H7B H 0.5174 0.7296 0.4035 0.043 Uiso 1 1 calc R . . 
C8 C 0.49412(18) 0.8725(4) 0.3090(4) 0.0588(12) Uani 1 1 d . . . 
H8A H 0.5212 0.9284 0.3312 0.088 Uiso 1 1 calc R . . 
H8B H 0.4630 0.9201 0.2983 0.088 Uiso 1 1 calc R . . 
H8C H 0.5037 0.8318 0.2434 0.088 Uiso 1 1 calc R . . 
C9 C 0.39486(14) 0.7474(4) 0.3428(3) 0.0399(8) Uani 1 1 d . . . 
H9A H 0.3998 0.7969 0.2784 0.048 Uiso 1 1 calc R . . 
H9B H 0.3689 0.6839 0.3276 0.048 Uiso 1 1 calc R . . 
C10 C 0.37515(16) 0.8320(4) 0.4280(4) 0.0523(11) Uani 1 1 d . . . 
H10A H 0.3436 0.8709 0.4048 0.078 Uiso 1 1 calc R . . 
H10B H 0.4002 0.8965 0.4429 0.078 Uiso 1 1 calc R . . 
H10C H 0.3688 0.7835 0.4915 0.078 Uiso 1 1 calc R . . 
C11 C 0.43873(14) 0.6019(3) 0.4653(3) 0.0381(8) Uani 1 1 d . . . 
H11A H 0.4314 0.6562 0.5258 0.046 Uiso 1 1 calc R . . 
H11B H 0.4715 0.5608 0.4788 0.046 Uiso 1 1 calc R . . 
C12 C 0.39798(17) 0.5029(4) 0.4591(4) 0.0530(10) Uani 1 1 d . . . 
H12A H 0.3971 0.4562 0.5248 0.079 Uiso 1 1 calc R . . 
H12B H 0.4055 0.4463 0.4011 0.079 Uiso 1 1 calc R . . 
H12C H 0.3651 0.5424 0.4473 0.079 Uiso 1 1 calc R . . 
N3 N 0.32986(10) -0.2822(2) -0.1310(2) 0.0293(6) Uani 1 1 d . . . 
C13 C 0.28836(17) -0.2091(4) -0.0715(3) 0.0335(9) Uiso 0.811(4) 1 d P A 1 
H13A H 0.3045 -0.1525 -0.0206 0.040 Uiso 0.811(4) 1 calc PR A 1 
H13B H 0.2691 -0.1579 -0.1220 0.040 Uiso 0.811(4) 1 calc PR A 1 
C13' C 0.2930(7) -0.3798(18) -0.0834(15) 0.039(4) Uiso 0.189(4) 1 d P A 2 
H13C H 0.3114 -0.4388 -0.0378 0.047 Uiso 0.189(4) 1 calc PR A 2 
H13D H 0.2755 -0.4267 -0.1391 0.047 Uiso 0.189(4) 1 calc PR A 2 
C14 C 0.25194(16) -0.2950(4) -0.0137(4) 0.0525(10) Uani 1 1 d . . . 
H14A H 0.2265 -0.2453 0.0229 0.079 Uiso 0.811(4) 1 calc PR A 1 
H14B H 0.2707 -0.3449 0.0371 0.079 Uiso 0.811(4) 1 calc PR A 1 
H14C H 0.2352 -0.3499 -0.0641 0.079 Uiso 0.811(4) 1 calc PR A 1 
H14D H 0.2265 -0.3499 0.0172 0.079 Uiso 0.189(4) 1 d PR A 2 
H14E H 0.2353 -0.2347 -0.0597 0.079 Uiso 0.189(4) 1 d PR A 2 
H14F H 0.2699 -0.2510 0.0420 0.079 Uiso 0.189(4) 1 d PR A 2 
C15 C 0.35779(16) -0.3650(4) -0.0577(3) 0.0323(9) Uiso 0.811(4) 1 d P A 1 
H15A H 0.3860 -0.4039 -0.0963 0.039 Uiso 0.811(4) 1 calc PR A 1 
H15B H 0.3348 -0.4322 -0.0352 0.039 Uiso 0.811(4) 1 calc PR A 1 
C15' C 0.3613(7) -0.2154(16) -0.0563(15) 0.034(4) Uiso 0.189(4) 1 d P A 2 
H15C H 0.3422 -0.1439 -0.0283 0.040 Uiso 0.189(4) 1 calc PR A 2 
H15D H 0.3915 -0.1828 -0.0928 0.040 Uiso 0.189(4) 1 calc PR A 2 
C16 C 0.37907(17) -0.3026(4) 0.0394(3) 0.0473(10) Uani 1 1 d . . . 
H16A H 0.3967 -0.3642 0.0822 0.071 Uiso 0.811(4) 1 calc PR A 1 
H16B H 0.3514 -0.2661 0.0799 0.071 Uiso 0.811(4) 1 calc PR A 1 
H16C H 0.4028 -0.2373 0.0185 0.071 Uiso 0.811(4) 1 calc PR A 1 
H16D H 0.4002 -0.2544 0.0874 0.071 Uiso 0.189(4) 1 d PR A 2 
H16E H 0.3985 -0.3729 0.0121 0.071 Uiso 0.189(4) 1 d PR A 2 
H16F H 0.3493 -0.3335 0.0768 0.071 Uiso 0.189(4) 1 d PR A 2 
C17 C 0.36573(18) -0.1852(4) -0.1748(4) 0.0347(9) Uiso 0.811(4) 1 d P A 1 
H17A H 0.3768 -0.1311 -0.1166 0.042 Uiso 0.811(4) 1 calc PR A 1 
H17B H 0.3960 -0.2282 -0.2020 0.042 Uiso 0.811(4) 1 calc PR A 1 
C17' C 0.3073(8) -0.2112(17) -0.2130(16) 0.036(4) Uiso 0.189(4) 1 d P A 2 
H17C H 0.2763 -0.1710 -0.1858 0.043 Uiso 0.189(4) 1 calc PR A 2 
H17D H 0.2971 -0.2679 -0.2701 0.043 Uiso 0.189(4) 1 calc PR A 2 
C18 C 0.34478(17) -0.1041(4) -0.2607(3) 0.0544(11) Uani 1 1 d . . . 
H18A H 0.3707 -0.0450 -0.2832 0.082 Uiso 0.811(4) 1 calc PR A 1 
H18B H 0.3153 -0.0587 -0.2345 0.082 Uiso 0.811(4) 1 calc PR A 1 
H18C H 0.3347 -0.1559 -0.3201 0.082 Uiso 0.811(4) 1 calc PR A 1 
H18D H 0.3271 -0.0587 -0.3161 0.082 Uiso 0.189(4) 1 d PR A 2 
H18E H 0.3751 -0.1431 -0.2896 0.082 Uiso 0.189(4) 1 d PR A 2 
H18F H 0.3544 -0.0464 -0.2049 0.082 Uiso 0.189(4) 1 d PR A 2 
C19 C 0.30461(17) -0.3553(4) -0.2156(4) 0.0359(10) Uiso 0.811(4) 1 d P A 1 
H19A H 0.2841 -0.2982 -0.2588 0.043 Uiso 0.811(4) 1 calc PR A 1 
H19B H 0.2813 -0.4159 -0.1830 0.043 Uiso 0.811(4) 1 calc PR A 1 
C19' C 0.3724(8) -0.387(2) -0.1877(16) 0.043(5) Uiso 0.189(4) 1 d P A 2 
H19C H 0.4047 -0.3461 -0.2061 0.052 Uiso 0.189(4) 1 calc PR A 2 
H19D H 0.3791 -0.4584 -0.1413 0.052 Uiso 0.189(4) 1 calc PR A 2 
C20 C 0.34199(19) -0.4262(5) -0.2881(4) 0.0639(13) Uani 1 1 d . . . 
H20A H 0.3230 -0.4719 -0.3413 0.096 Uiso 0.811(4) 1 calc PR A 1 
H20B H 0.3619 -0.4845 -0.2462 0.096 Uiso 0.811(4) 1 calc PR A 1 
H20C H 0.3646 -0.3668 -0.3223 0.096 Uiso 0.811(4) 1 calc PR A 1 
H20D H 0.3617 -0.4867 -0.3281 0.096 Uiso 0.189(4) 1 d PR A 2 
H20E H 0.3355 -0.3530 -0.3315 0.096 Uiso 0.189(4) 1 d PR A 2 
H20F H 0.3098 -0.4635 -0.2670 0.096 Uiso 0.189(4) 1 d PR A 2 
N4 N 0.5046(2) -0.3169(5) 0.0219(5) 0.105(2) Uani 1 1 d . . . 
C21 C 0.5267(3) -0.2302(6) 0.0290(5) 0.085(2) Uani 1 1 d . . . 
C22 C 0.5573(3) -0.1188(6) 0.0408(6) 0.176(5) Uani 1 1 d . . . 
H22A H 0.5465 -0.0565 -0.0103 0.263 Uiso 1 1 calc R . . 
H22B H 0.5929 -0.1394 0.0290 0.263 Uiso 1 1 calc R . . 
H22C H 0.5532 -0.0857 0.1117 0.263 Uiso 1 1 calc R . . 
 
loop_ 
 _atom_site_aniso_label 
 _atom_site_aniso_U_11 
 _atom_site_aniso_U_22 
 _atom_site_aniso_U_33 
 _atom_site_aniso_U_23 
 _atom_site_aniso_U_13 
 _atom_site_aniso_U_12 
Fe1 0.0223(2) 0.0280(2) 0.0313(2) -0.00042(19) -0.00233(19) -0.00045(16) 
Fe2 0.0263(2) 0.0254(2) 0.0296(2) 0.00088(18) -0.00050(18) -0.00260(16) 
Fe3 0.0258(2) 0.0257(2) 0.0295(2) -0.00261(19) 0.00100(18) 0.00141(16) 
Fe4 0.0249(2) 0.0300(2) 0.0254(2) -0.00106(18) -0.00028(18) -0.00097(17) 
Cl1 0.0284(4) 0.0478(5) 0.0650(6) 0.0061(5) -0.0124(4) -0.0002(4) 
Cl2 0.0401(4) 0.0350(4) 0.0434(5) 0.0045(4) 0.0040(4) -0.0091(3) 
Cl3 0.0402(4) 0.0345(4) 0.0484(5) -0.0089(4) 0.0068(4) 0.0073(3) 
Cl4 0.0492(6) 0.0760(7) 0.0278(4) 0.0041(4) -0.0028(4) -0.0071(5) 
S1 0.0326(4) 0.0369(4) 0.0257(4) 0.0007(3) -0.0017(3) -0.0018(3) 
S2 0.0273(4) 0.0239(4) 0.0346(4) 0.0005(3) 0.0020(3) -0.0020(3) 
S3 0.0302(4) 0.0254(4) 0.0379(4) -0.0048(3) 0.0022(3) 0.0013(3) 
N1 0.0226(12) 0.0286(13) 0.0259(13) -0.0010(10) -0.0007(10) -0.0009(10) 
C1 0.0216(15) 0.0397(18) 0.0414(18) 0.0017(15) -0.0048(13) 0.0018(13) 
C2 0.0262(17) 0.060(3) 0.057(2) 0.004(2) 0.0034(16) 0.0005(16) 
C3 0.0358(19) 0.050(2) 0.054(2) 0.0114(19) -0.0108(17) 0.0072(17) 
C4 0.0346(19) 0.054(2) 0.054(2) -0.0093(19) -0.0157(17) -0.0057(18) 
N2 0.0322(15) 0.0343(15) 0.0294(14) -0.0017(11) -0.0049(11) -0.0021(11) 
C5 0.044(2) 0.054(2) 0.0327(18) -0.0115(17) -0.0035(16) -0.0029(18) 
C6 0.058(3) 0.055(3) 0.059(3) -0.018(2) -0.001(2) 0.013(2) 
C7 0.0314(17) 0.0394(19) 0.0375(18) 0.0023(15) -0.0099(15) -0.0049(14) 
C8 0.059(3) 0.059(3) 0.059(3) 0.017(2) -0.011(2) -0.018(2) 
C9 0.0355(19) 0.046(2) 0.0382(19) -0.0004(16) -0.0091(15) -0.0015(16) 
C10 0.041(2) 0.057(2) 0.060(3) -0.011(2) -0.0017(19) 0.0056(19) 
C11 0.044(2) 0.0384(18) 0.0319(18) 0.0032(14) -0.0038(15) -0.0022(16) 
C12 0.053(3) 0.050(2) 0.056(3) 0.0042(19) 0.001(2) -0.008(2) 
N3 0.0226(13) 0.0331(14) 0.0323(14) 0.0014(11) -0.0024(10) -0.0035(11) 
C14 0.036(2) 0.069(3) 0.052(2) 0.007(2) 0.012(2) 0.0030(18) 
C16 0.058(3) 0.037(2) 0.046(2) -0.0002(16) -0.023(2) 0.0088(18) 
C18 0.050(3) 0.060(3) 0.053(3) 0.027(2) 0.0069(19) 0.002(2) 
C20 0.079(3) 0.070(3) 0.043(2) -0.019(2) 0.007(2) -0.006(2) 
N4 0.101(4) 0.080(3) 0.135(5) -0.049(4) 0.070(4) -0.033(3) 
C21 0.105(5) 0.066(4) 0.083(4) 0.001(3) 0.049(4) 0.023(3) 
C22 0.281(12) 0.062(4) 0.184(8) -0.053(4) 0.193(9) -0.072(5) 
 
_geom_special_details 
; 
 All esds (except the esd in the dihedral angle between two l.s. planes) 
 are estimated using the full covariance matrix.  The cell esds are taken 
 into account individually in the estimation of esds in distances, angles 
 and torsion angles; correlations between esds in cell parameters are only 
 used when they are defined by crystal symmetry.  An approximate (isotropic) 
 treatment of cell esds is used for estimating esds involving l.s. planes. 
; 
 
loop_ 
 _geom_bond_atom_site_label_1 
 _geom_bond_atom_site_label_2 
 _geom_bond_distance 
 _geom_bond_site_symmetry_2 
 _geom_bond_publ_flag 
Fe1 Cl1 2.2310(10) . ? 
Fe1 S2 2.2823(9) . ? 
Fe1 S1 2.2900(10) . ? 
Fe1 S3 2.3039(9) . ? 
Fe1 Fe4 2.7587(6) . ? 
Fe1 Fe3 2.7750(6) . ? 
Fe1 Fe2 2.7758(6) . ? 
Fe2 N1 1.948(3) . ? 
Fe2 Cl2 2.2333(9) . ? 
Fe2 S3 2.3048(9) . ? 
Fe2 S1 2.3121(9) . ? 
Fe2 Fe4 2.6525(6) . ? 
Fe2 Fe3 2.6549(6) . ? 
Fe3 N1 1.963(3) . ? 
Fe3 Cl3 2.2288(9) . ? 
Fe3 S2 2.2983(9) . ? 
Fe3 S1 2.3029(10) . ? 
Fe3 Fe4 2.6575(6) . ? 
Fe4 N1 1.948(3) . ? 
Fe4 Cl4 2.2147(10) . ? 
Fe4 S3 2.2996(9) . ? 
Fe4 S2 2.3099(9) . ? 
N1 C1 1.475(4) . ? 
C1 C2 1.528(5) . ? 
C1 C4 1.530(5) . ? 
C1 C3 1.537(5) . ? 
C2 H2A 0.9800 . ? 
C2 H2B 0.9800 . ? 
C2 H2C 0.9800 . ? 
C3 H3A 0.9800 . ? 
C3 H3B 0.9800 . ? 
C3 H3C 0.9800 . ? 
C4 H4A 0.9800 . ? 
C4 H4B 0.9800 . ? 
C4 H4C 0.9800 . ? 
N2 C9 1.515(5) . ? 
N2 C11 1.517(4) . ? 
N2 C7 1.519(4) . ? 
N2 C5 1.520(5) . ? 
C5 C6 1.514(6) . ? 
C5 H5A 0.9900 . ? 
C5 H5B 0.9900 . ? 
C6 H6A 0.9800 . ? 
C6 H6B 0.9800 . ? 
C6 H6C 0.9800 . ? 
C7 C8 1.512(5) . ? 
C7 H7A 0.9900 . ? 
C7 H7B 0.9900 . ? 
C8 H8A 0.9800 . ? 
C8 H8B 0.9800 . ? 
C8 H8C 0.9800 . ? 
C9 C10 1.514(6) . ? 
C9 H9A 0.9900 . ? 
C9 H9B 0.9900 . ? 
C10 H10A 0.9800 . ? 
C10 H10B 0.9800 . ? 
C10 H10C 0.9800 . ? 
C11 C12 1.520(5) . ? 
C11 H11A 0.9900 . ? 
C11 H11B 0.9900 . ? 
C12 H12A 0.9800 . ? 
C12 H12B 0.9800 . ? 
C12 H12C 0.9800 . ? 
N3 C17' 1.430(19) . ? 
N3 C15' 1.458(19) . ? 
N3 C15 1.490(5) . ? 
N3 C19 1.496(5) . ? 
N3 C17 1.520(5) . ? 
N3 C13 1.551(5) . ? 
N3 C13' 1.558(19) . ? 
N3 C19' 1.75(2) . ? 
C13 C14 1.528(6) . ? 
C13 H13A 0.9900 . ? 
C13 H13B 0.9900 . ? 
C13 H14E 1.4393 . ? 
C13' C14 1.677(19) . ? 
C13' H13C 0.9900 . ? 
C13' H13D 0.9900 . ? 
C14 H14A 0.9800 . ? 
C14 H14B 0.9800 . ? 
C14 H14C 0.9800 . ? 
C14 H14D 0.9801 . ? 
C14 H14E 0.9801 . ? 
C14 H14F 0.9799 . ? 
C15 C16 1.519(5) . ? 
C15 H15A 0.9900 . ? 
C15 H15B 0.9900 . ? 
C15 H16E 1.4017 . ? 
C15' C16 1.613(19) . ? 
C15' H15C 0.9900 . ? 
C15' H15D 0.9900 . ? 
C16 H16A 0.9800 . ? 
C16 H16B 0.9800 . ? 
C16 H16C 0.9800 . ? 
C16 H16D 0.9800 . ? 
C16 H16E 0.9800 . ? 
C16 H16F 0.9801 . ? 
C17 C18 1.509(6) . ? 
C17 H17A 0.9900 . ? 
C17 H17B 0.9900 . ? 
C17 H18E 1.5559 . ? 
C17 H18F 1.5738 . ? 
C17' C18 1.641(19) . ? 
C17' H17C 0.9900 . ? 
C17' H17D 0.9900 . ? 
C18 H18A 0.9800 . ? 
C18 H18B 0.9800 . ? 
C18 H18C 0.9800 . ? 
C18 H18D 0.9801 . ? 
C18 H18E 0.9798 . ? 
C18 H18F 0.9800 . ? 
C19 C20 1.557(6) . ? 
C19 H19A 0.9900 . ? 
C19 H19B 0.9900 . ? 
C19 H20F 1.3462 . ? 
C19' C20 1.57(2) . ? 
C19' H19C 0.9900 . ? 
C19' H19D 0.9900 . ? 
C20 H20A 0.9800 . ? 
C20 H20B 0.9800 . ? 
C20 H20C 0.9800 . ? 
C20 H20D 0.9800 . ? 
C20 H20E 0.9800 . ? 
C20 H20F 0.9800 . ? 
N4 C21 1.106(7) . ? 
C21 C22 1.458(9) . ? 
C22 H22A 0.9800 . ? 
C22 H22B 0.9800 . ? 
C22 H22C 0.9800 . ? 
 
loop_ 
 _geom_angle_atom_site_label_1 
 _geom_angle_atom_site_label_2 
 _geom_angle_atom_site_label_3 
 _geom_angle 
 _geom_angle_site_symmetry_1 
 _geom_angle_site_symmetry_3 
 _geom_angle_publ_flag 
Cl1 Fe1 S2 112.82(4) . . ? 
Cl1 Fe1 S1 120.57(4) . . ? 
S2 Fe1 S1 103.29(3) . . ? 
Cl1 Fe1 S3 110.65(4) . . ? 
S2 Fe1 S3 104.27(4) . . ? 
S1 Fe1 S3 103.67(3) . . ? 
Cl1 Fe1 Fe4 140.39(4) . . ? 
S2 Fe1 Fe4 53.53(2) . . ? 
S1 Fe1 Fe4 99.02(3) . . ? 
S3 Fe1 Fe4 53.11(2) . . ? 
Cl1 Fe1 Fe3 150.27(3) . . ? 
S2 Fe1 Fe3 52.98(2) . . ? 
S1 Fe1 Fe3 53.04(3) . . ? 
S3 Fe1 Fe3 98.74(3) . . ? 
Fe4 Fe1 Fe3 57.399(16) . . ? 
Cl1 Fe1 Fe2 147.78(3) . . ? 
S2 Fe1 Fe2 98.87(3) . . ? 
S1 Fe1 Fe2 53.27(2) . . ? 
S3 Fe1 Fe2 52.98(2) . . ? 
Fe4 Fe1 Fe2 57.274(16) . . ? 
Fe3 Fe1 Fe2 57.147(15) . . ? 
N1 Fe2 Cl2 118.97(8) . . ? 
N1 Fe2 S3 100.93(8) . . ? 
Cl2 Fe2 S3 115.61(4) . . ? 
N1 Fe2 S1 101.55(8) . . ? 
Cl2 Fe2 S1 114.45(4) . . ? 
S3 Fe2 S1 102.95(3) . . ? 
N1 Fe2 Fe4 47.09(8) . . ? 
Cl2 Fe2 Fe4 143.93(3) . . ? 
S3 Fe2 Fe4 54.73(2) . . ? 
S1 Fe2 Fe4 101.54(3) . . ? 
N1 Fe2 Fe3 47.48(7) . . ? 
Cl2 Fe2 Fe3 142.13(3) . . ? 
S3 Fe2 Fe3 102.23(3) . . ? 
S1 Fe2 Fe3 54.72(2) . . ? 
Fe4 Fe2 Fe3 60.094(17) . . ? 
N1 Fe2 Fe1 94.61(7) . . ? 
Cl2 Fe2 Fe1 146.40(3) . . ? 
S3 Fe2 Fe1 52.95(2) . . ? 
S1 Fe2 Fe1 52.54(3) . . ? 
Fe4 Fe2 Fe1 61.040(17) . . ? 
Fe3 Fe2 Fe1 61.412(15) . . ? 
N1 Fe3 Cl3 118.72(8) . . ? 
N1 Fe3 S2 101.19(8) . . ? 
Cl3 Fe3 S2 113.14(4) . . ? 
N1 Fe3 S1 101.40(8) . . ? 
Cl3 Fe3 S1 117.48(4) . . ? 
S2 Fe3 S1 102.39(3) . . ? 
N1 Fe3 Fe2 47.01(8) . . ? 
Cl3 Fe3 Fe2 144.66(3) . . ? 
S2 Fe3 Fe2 102.00(3) . . ? 
S1 Fe3 Fe2 55.04(2) . . ? 
N1 Fe3 Fe4 46.96(7) . . ? 
Cl3 Fe3 Fe4 140.88(3) . . ? 
S2 Fe3 Fe4 54.99(2) . . ? 
S1 Fe3 Fe4 101.64(3) . . ? 
Fe2 Fe3 Fe4 59.909(17) . . ? 
N1 Fe3 Fe1 94.29(8) . . ? 
Cl3 Fe3 Fe1 146.85(3) . . ? 
S2 Fe3 Fe1 52.45(2) . . ? 
S1 Fe3 Fe1 52.62(3) . . ? 
Fe2 Fe3 Fe1 61.441(15) . . ? 
Fe4 Fe3 Fe1 60.993(16) . . ? 
N1 Fe4 Cl4 121.68(8) . . ? 
N1 Fe4 S3 101.12(8) . . ? 
Cl4 Fe4 S3 116.02(4) . . ? 
N1 Fe4 S2 101.26(8) . . ? 
Cl4 Fe4 S2 110.84(4) . . ? 
S3 Fe4 S2 103.54(3) . . ? 
N1 Fe4 Fe2 47.09(8) . . ? 
Cl4 Fe4 Fe2 147.37(4) . . ? 
S3 Fe4 Fe2 54.92(2) . . ? 
S2 Fe4 Fe2 101.75(3) . . ? 
N1 Fe4 Fe3 47.43(8) . . ? 
Cl4 Fe4 Fe3 141.62(4) . . ? 
S3 Fe4 Fe3 102.29(3) . . ? 
S2 Fe4 Fe3 54.58(2) . . ? 
Fe2 Fe4 Fe3 59.997(17) . . ? 
N1 Fe4 Fe1 95.15(8) . . ? 
Cl4 Fe4 Fe1 143.00(4) . . ? 
S3 Fe4 Fe1 53.25(2) . . ? 
S2 Fe4 Fe1 52.62(2) . . ? 
Fe2 Fe4 Fe1 61.686(17) . . ? 
Fe3 Fe4 Fe1 61.608(17) . . ? 
Fe1 S1 Fe3 74.34(3) . . ? 
Fe1 S1 Fe2 74.19(3) . . ? 
Fe3 S1 Fe2 70.24(3) . . ? 
Fe1 S2 Fe3 74.57(3) . . ? 
Fe1 S2 Fe4 73.84(3) . . ? 
Fe3 S2 Fe4 70.43(3) . . ? 
Fe4 S3 Fe1 73.64(3) . . ? 
Fe4 S3 Fe2 70.35(3) . . ? 
Fe1 S3 Fe2 74.07(3) . . ? 
C1 N1 Fe4 127.5(2) . . ? 
C1 N1 Fe2 128.3(2) . . ? 
Fe4 N1 Fe2 85.82(10) . . ? 
C1 N1 Fe3 129.0(2) . . ? 
Fe4 N1 Fe3 85.61(10) . . ? 
Fe2 N1 Fe3 85.51(10) . . ? 
N1 C1 C2 109.1(3) . . ? 
N1 C1 C4 109.2(3) . . ? 
C2 C1 C4 110.4(3) . . ? 
N1 C1 C3 109.0(3) . . ? 
C2 C1 C3 109.6(3) . . ? 
C4 C1 C3 109.5(3) . . ? 
C1 C2 H2A 109.5 . . ? 
C1 C2 H2B 109.5 . . ? 
H2A C2 H2B 109.5 . . ? 
C1 C2 H2C 109.5 . . ? 
H2A C2 H2C 109.5 . . ? 
H2B C2 H2C 109.5 . . ? 
C1 C3 H3A 109.5 . . ? 
C1 C3 H3B 109.5 . . ? 
H3A C3 H3B 109.5 . . ? 
C1 C3 H3C 109.5 . . ? 
H3A C3 H3C 109.5 . . ? 
H3B C3 H3C 109.5 . . ? 
C1 C4 H4A 109.5 . . ? 
C1 C4 H4B 109.5 . . ? 
H4A C4 H4B 109.5 . . ? 
C1 C4 H4C 109.5 . . ? 
H4A C4 H4C 109.5 . . ? 
H4B C4 H4C 109.5 . . ? 
C9 N2 C11 111.3(3) . . ? 
C9 N2 C7 111.0(3) . . ? 
C11 N2 C7 106.3(3) . . ? 
C9 N2 C5 106.5(3) . . ? 
C11 N2 C5 111.0(3) . . ? 
C7 N2 C5 110.9(3) . . ? 
C6 C5 N2 115.0(3) . . ? 
C6 C5 H5A 108.5 . . ? 
N2 C5 H5A 108.5 . . ? 
C6 C5 H5B 108.5 . . ? 
N2 C5 H5B 108.5 . . ? 
H5A C5 H5B 107.5 . . ? 
C5 C6 H6A 109.5 . . ? 
C5 C6 H6B 109.5 . . ? 
H6A C6 H6B 109.5 . . ? 
C5 C6 H6C 109.5 . . ? 
H6A C6 H6C 109.5 . . ? 
H6B C6 H6C 109.5 . . ? 
C8 C7 N2 115.2(3) . . ? 
C8 C7 H7A 108.5 . . ? 
N2 C7 H7A 108.5 . . ? 
C8 C7 H7B 108.5 . . ? 
N2 C7 H7B 108.5 . . ? 
H7A C7 H7B 107.5 . . ? 
C7 C8 H8A 109.5 . . ? 
C7 C8 H8B 109.5 . . ? 
H8A C8 H8B 109.5 . . ? 
C7 C8 H8C 109.5 . . ? 
H8A C8 H8C 109.5 . . ? 
H8B C8 H8C 109.5 . . ? 
C10 C9 N2 114.8(3) . . ? 
C10 C9 H9A 108.6 . . ? 
N2 C9 H9A 108.6 . . ? 
C10 C9 H9B 108.6 . . ? 
N2 C9 H9B 108.6 . . ? 
H9A C9 H9B 107.5 . . ? 
C9 C10 H10A 109.5 . . ? 
C9 C10 H10B 109.5 . . ? 
H10A C10 H10B 109.5 . . ? 
C9 C10 H10C 109.5 . . ? 
H10A C10 H10C 109.5 . . ? 
H10B C10 H10C 109.5 . . ? 
N2 C11 C12 115.1(3) . . ? 
N2 C11 H11A 108.5 . . ? 
C12 C11 H11A 108.5 . . ? 
N2 C11 H11B 108.5 . . ? 
C12 C11 H11B 108.5 . . ? 
H11A C11 H11B 107.5 . . ? 
C11 C12 H12A 109.5 . . ? 
C11 C12 H12B 109.5 . . ? 
H12A C12 H12B 109.5 . . ? 
C11 C12 H12C 109.5 . . ? 
H12A C12 H12C 109.5 . . ? 
H12B C12 H12C 109.5 . . ? 
C17' N3 C15' 117.0(11) . . ? 
C17' N3 C15 171.7(8) . . ? 
C15' N3 C15 66.5(8) . . ? 
C17' N3 C19 64.2(8) . . ? 
C15' N3 C19 171.6(8) . . ? 
C15 N3 C19 111.2(3) . . ? 
C17' N3 C17 67.8(8) . . ? 
C15' N3 C17 62.9(8) . . ? 
C15 N3 C17 109.5(3) . . ? 
C19 N3 C17 112.0(3) . . ? 
C17' N3 C13 77.9(8) . . ? 
C15' N3 C13 80.4(8) . . ? 
C15 N3 C13 110.4(3) . . ? 
C19 N3 C13 107.8(3) . . ? 
C17 N3 C13 105.9(3) . . ? 
C17' N3 C13' 112.7(11) . . ? 
C15' N3 C13' 115.8(11) . . ? 
C15 N3 C13' 70.2(8) . . ? 
C19 N3 C13' 69.4(8) . . ? 
C17 N3 C13' 178.5(8) . . ? 
C13 N3 C13' 73.1(7) . . ? 
C17' N3 C19' 108.1(11) . . ? 
C15' N3 C19' 102.8(10) . . ? 
C15 N3 C19' 63.6(7) . . ? 
C19 N3 C19' 69.5(7) . . ? 
C17 N3 C19' 83.6(8) . . ? 
C13 N3 C19' 170.4(8) . . ? 
C13' N3 C19' 97.5(10) . . ? 
C14 C13 N3 112.1(3) . . ? 
C14 C13 H13A 109.2 . . ? 
N3 C13 H13A 109.2 . . ? 
C14 C13 H13B 109.2 . . ? 
N3 C13 H13B 109.2 . . ? 
H13A C13 H13B 107.9 . . ? 
C14 C13 H14E 38.4 . . ? 
N3 C13 H14E 130.2 . . ? 
H13A C13 H14E 118.1 . . ? 
H13B C13 H14E 71.0 . . ? 
N3 C13' C14 104.2(11) . . ? 
N3 C13' H13C 110.9 . . ? 
C14 C13' H13C 110.9 . . ? 
N3 C13' H13D 110.9 . . ? 
C14 C13' H13D 110.9 . . ? 
H13C C13' H13D 108.9 . . ? 
C13 C14 C13' 70.4(7) . . ? 
C13 C14 H14A 109.5 . . ? 
C13' C14 H14A 176.2 . . ? 
C13 C14 H14B 109.5 . . ? 
C13' C14 H14B 73.9 . . ? 
H14A C14 H14B 109.5 . . ? 
C13 C14 H14C 109.5 . . ? 
C13' C14 H14C 67.4 . . ? 
H14A C14 H14C 109.5 . . ? 
H14B C14 H14C 109.5 . . ? 
C13 C14 H14D 174.3 . . ? 
C13' C14 H14D 109.3 . . ? 
H14A C14 H14D 70.4 . . ? 
H14B C14 H14D 75.6 . . ? 
H14C C14 H14D 65.8 . . ? 
C13 C14 H14E 65.9 . . ? 
C13' C14 H14E 109.5 . . ? 
H14A C14 H14E 67.3 . . ? 
H14B C14 H14E 171.8 . . ? 
H14C C14 H14E 78.7 . . ? 
H14D C14 H14E 109.5 . . ? 
C13 C14 H14F 75.6 . . ? 
C13' C14 H14F 109.5 . . ? 
H14A C14 H14F 73.9 . . ? 
H14B C14 H14F 62.4 . . ? 
H14C C14 H14F 171.8 . . ? 
H14D C14 H14F 109.5 . . ? 
H14E C14 H14F 109.5 . . ? 
N3 C15 C16 115.6(3) . . ? 
N3 C15 H15A 108.4 . . ? 
C16 C15 H15A 108.4 . . ? 
N3 C15 H15B 108.4 . . ? 
C16 C15 H15B 108.4 . . ? 
H15A C15 H15B 107.4 . . ? 
N3 C15 H16E 144.9 . . ? 
C16 C15 H16E 38.9 . . ? 
H15A C15 H16E 73.2 . . ? 
H15B C15 H16E 104.1 . . ? 
N3 C15' C16 112.0(11) . . ? 
N3 C15' H15C 109.2 . . ? 
C16 C15' H15C 109.2 . . ? 
N3 C15' H15D 109.2 . . ? 
C16 C15' H15D 109.2 . . ? 
H15C C15' H15D 107.9 . . ? 
C15 C16 C15' 62.0(7) . . ? 
C15 C16 H16A 109.5 . . ? 
C15' C16 H16A 163.4 . . ? 
C15 C16 H16B 109.5 . . ? 
C15' C16 H16B 87.1 . . ? 
H16A C16 H16B 109.5 . . ? 
C15 C16 H16C 109.5 . . ? 
C15' C16 H16C 64.0 . . ? 
H16A C16 H16C 109.5 . . ? 
H16B C16 H16C 109.5 . . ? 
C15 C16 H16D 163.4 . . ? 
C15' C16 H16D 109.4 . . ? 
H16A C16 H16D 74.8 . . ? 
H16B C16 H16D 83.2 . . ? 
H16C C16 H16D 54.8 . . ? 
C15 C16 H16E 64.0 . . ? 
C15' C16 H16E 109.5 . . ? 
H16A C16 H16E 54.8 . . ? 
H16B C16 H16E 153.1 . . ? 
H16C C16 H16E 97.0 . . ? 
H16D C16 H16E 109.5 . . ? 
C15 C16 H16F 87.1 . . ? 
C15' C16 H16F 109.5 . . ? 
H16A C16 H16F 83.1 . . ? 
H16B C16 H16F 43.8 . . ? 
H16C C16 H16F 153.1 . . ? 
H16D C16 H16F 109.5 . . ? 
H16E C16 H16F 109.5 . . ? 
C18 C17 N3 115.9(4) . . ? 
C18 C17 H17A 108.3 . . ? 
N3 C17 H17A 108.3 . . ? 
C18 C17 H17B 108.3 . . ? 
N3 C17 H17B 108.3 . . ? 
H17A C17 H17B 107.4 . . ? 
C18 C17 H18E 37.2 . . ? 
N3 C17 H18E 130.4 . . ? 
H17A C17 H18E 119.3 . . ? 
H17B C17 H18E 71.1 . . ? 
C18 C17 H18F 37.0 . . ? 
N3 C17 H18F 128.7 . . ? 
H17A C17 H18F 71.3 . . ? 
H17B C17 H18F 120.9 . . ? 
H18E C17 H18F 61.5 . . ? 
N3 C17' C18 113.3(13) . . ? 
N3 C17' H17C 108.9 . . ? 
C18 C17' H17C 108.9 . . ? 
N3 C17' H17D 108.9 . . ? 
C18 C17' H17D 108.9 . . ? 
H17C C17' H17D 107.7 . . ? 
C17 C18 C17' 62.9(7) . . ? 
C17 C18 H18A 109.5 . . ? 
C17' C18 H18A 172.3 . . ? 
C17 C18 H18B 109.5 . . ? 
C17' C18 H18B 75.1 . . ? 
H18A C18 H18B 109.5 . . ? 
C17 C18 H18C 109.5 . . ? 
C17' C18 H18C 73.9 . . ? 
H18A C18 H18C 109.5 . . ? 
H18B C18 H18C 109.5 . . ? 
C17 C18 H18D 172.2 . . ? 
C17' C18 H18D 109.3 . . ? 
H18A C18 H18D 78.3 . . ? 
H18B C18 H18D 67.5 . . ? 
H18C C18 H18D 66.1 . . ? 
C17 C18 H18E 74.0 . . ? 
C17' C18 H18E 109.6 . . ? 
H18A C18 H18E 66.0 . . ? 
H18B C18 H18E 175.3 . . ? 
H18C C18 H18E 71.7 . . ? 
H18D C18 H18E 109.5 . . ? 
C17 C18 H18F 75.1 . . ? 
C17' C18 H18F 109.5 . . ? 
H18A C18 H18F 67.6 . . ? 
H18B C18 H18F 69.0 . . ? 
H18C C18 H18F 175.4 . . ? 
H18D C18 H18F 109.5 . . ? 
H18E C18 H18F 109.5 . . ? 
N3 C19 C20 113.9(4) . . ? 
N3 C19 H19A 108.8 . . ? 
C20 C19 H19A 108.8 . . ? 
N3 C19 H19B 108.8 . . ? 
C20 C19 H19B 108.8 . . ? 
H19A C19 H19B 107.7 . . ? 
N3 C19 H20F 139.8 . . ? 
C20 C19 H20F 38.6 . . ? 
H19A C19 H20F 108.8 . . ? 
H19B C19 H20F 72.4 . . ? 
C20 C19' N3 100.5(11) . . ? 
C20 C19' H19C 111.7 . . ? 
N3 C19' H19C 111.7 . . ? 
C20 C19' H19D 111.7 . . ? 
N3 C19' H19D 111.7 . . ? 
H19C C19' H19D 109.4 . . ? 
C19 C20 C19' 73.0(8) . . ? 
C19 C20 H20A 109.5 . . ? 
C19' C20 H20A 164.9 . . ? 
C19 C20 H20B 109.5 . . ? 
C19' C20 H20B 56.8 . . ? 
H20A C20 H20B 109.5 . . ? 
C19 C20 H20C 109.5 . . ? 
C19' C20 H20C 82.8 . . ? 
H20A C20 H20C 109.5 . . ? 
H20B C20 H20C 109.5 . . ? 
C19 C20 H20D 167.6 . . ? 
C19' C20 H20D 109.5 . . ? 
H20A C20 H20D 64.9 . . ? 
H20B C20 H20D 64.6 . . ? 
H20C C20 H20D 82.9 . . ? 
C19 C20 H20E 80.2 . . ? 
C19' C20 H20E 109.5 . . ? 
H20A C20 H20E 85.5 . . ? 
H20B C20 H20E 156.9 . . ? 
H20C C20 H20E 47.8 . . ? 
H20D C20 H20E 109.5 . . ? 
C19 C20 H20F 59.0 . . ? 
C19' C20 H20F 109.4 . . ? 
H20A C20 H20F 62.4 . . ? 
H20B C20 H20F 93.2 . . ? 
H20C C20 H20F 157.2 . . ? 
H20D C20 H20F 109.5 . . ? 
H20E C20 H20F 109.5 . . ? 
N4 C21 C22 177.6(9) . . ? 
C21 C22 H22A 109.5 . . ? 
C21 C22 H22B 109.5 . . ? 
H22A C22 H22B 109.5 . . ? 
C21 C22 H22C 109.5 . . ? 
H22A C22 H22C 109.5 . . ? 
H22B C22 H22C 109.5 . . ? 
 
_diffrn_measured_fraction_theta_max    0.997 
_diffrn_reflns_theta_full              30.05 
_diffrn_measured_fraction_theta_full   0.997 
_refine_diff_density_max    0.525 
_refine_diff_density_min   -0.501 
_refine_diff_density_rms    0.088 


#===END


 
data_sl42 
 
_audit_creation_method            SHELXL-97 
_chemical_name_systematic 
; 
 (Et4N)2[Fe4(mu3-NtBu)(mu3-Se)3Cl4] 
; 
_chemical_name_common             '(Et4N)2[Fe4(mu3-NtBu)(mu3-Se)3Cl4]' 
_chemical_melting_point           ? 
_chemical_formula_moiety          
'(Et4N +)2 [ (Fe 3+)2 (Fe 2+)2 (NtBu 2-) (Se 2-)3 (Cl -)4 ]'
_chemical_formula_sum 
 'C20 H49 Cl4 Fe4 N3 Se3' 
_chemical_formula_weight          933.70 
 
loop_ 
 _atom_type_symbol 
 _atom_type_description 
 _atom_type_scat_dispersion_real 
 _atom_type_scat_dispersion_imag 
 _atom_type_scat_source 
 'C'  'C'   0.0033   0.0016 
 'International Tables Vol C Tables 4.2.6.8 and 6.1.1.4' 
 'H'  'H'   0.0000   0.0000 
 'International Tables Vol C Tables 4.2.6.8 and 6.1.1.4' 
 'N'  'N'   0.0061   0.0033 
 'International Tables Vol C Tables 4.2.6.8 and 6.1.1.4' 
 'Cl'  'Cl'   0.1484   0.1585 
 'International Tables Vol C Tables 4.2.6.8 and 6.1.1.4' 
 'Fe'  'Fe'   0.3463   0.8444 
 'International Tables Vol C Tables 4.2.6.8 and 6.1.1.4' 
 'Se'  'Se'  -0.0929   2.2259 
 'International Tables Vol C Tables 4.2.6.8 and 6.1.1.4' 
 
_symmetry_cell_setting            Orthorhombic 
_symmetry_space_group_name_H-M    P2(1)2(1)2(1) 
 
loop_ 
 _symmetry_equiv_pos_as_xyz 
 'x, y, z' 
 '-x+1/2, -y, z+1/2' 
 '-x, y+1/2, -z+1/2' 
 'x+1/2, -y+1/2, -z' 
 
_cell_length_a                    11.5384(12) 
_cell_length_b                    14.1705(15) 
_cell_length_c                    21.395(2) 
_cell_angle_alpha                 90.00 
_cell_angle_beta                  90.00 
_cell_angle_gamma                 90.00 
_cell_volume                      3498.3(6) 
_cell_formula_units_Z             4 
_cell_measurement_temperature     200(2) 
_cell_measurement_reflns_used     4700 
_cell_measurement_theta_min       2.87 
_cell_measurement_theta_max       21.15
 
_exptl_crystal_description        block 
_exptl_crystal_colour             black 
_exptl_crystal_size_max           0.22 
_exptl_crystal_size_mid           0.18 
_exptl_crystal_size_min           0.04 
_exptl_crystal_density_meas       ? 
_exptl_crystal_density_diffrn     1.773 
_exptl_crystal_density_method     'not measured' 
_exptl_crystal_F_000              1856 
_exptl_absorpt_coefficient_mu     5.068 
_exptl_absorpt_correction_type    empirical 
_exptl_absorpt_correction_T_min   0.4019 
_exptl_absorpt_correction_T_max   0.8230 
_exptl_absorpt_process_details    APEXII 
 
_exptl_special_details 
; 
 ? 
; 
 
_diffrn_ambient_temperature       200(2) 
_diffrn_radiation_wavelength      0.71073 
_diffrn_radiation_type            MoK\a 
_diffrn_radiation_source          'fine-focus sealed tube' 
_diffrn_radiation_monochromator   graphite 
_diffrn_measurement_device_type   ? 
_diffrn_measurement_method        ? 
_diffrn_detector_area_resol_mean  ? 
_diffrn_standards_number          ? 
_diffrn_standards_interval_count  ? 
_diffrn_standards_interval_time   ? 
_diffrn_standards_decay_%         ? 
_diffrn_reflns_number             27688 
_diffrn_reflns_av_R_equivalents   0.0650 
_diffrn_reflns_av_sigmaI/netI     0.0552 
_diffrn_reflns_limit_h_min        -13 
_diffrn_reflns_limit_h_max        13 
_diffrn_reflns_limit_k_min        -16 
_diffrn_reflns_limit_k_max        16 
_diffrn_reflns_limit_l_min        -25 
_diffrn_reflns_limit_l_max        25 
_diffrn_reflns_theta_min          2.87 
_diffrn_reflns_theta_max          25.00 
_reflns_number_total              6156 
_reflns_number_gt                 5219 
_reflns_threshold_expression      >2sigma(I) 
 
_computing_data_collection        ? 
_computing_cell_refinement        ? 
_computing_data_reduction         ? 
_computing_structure_solution     'SHELXS-97 (Sheldrick, 1990)' 
_computing_structure_refinement   'SHELXL-97 (Sheldrick, 1997)' 
_computing_molecular_graphics     ? 
_computing_publication_material   ? 
 
_refine_special_details 
; 
 Refinement of F^2^ against ALL reflections.  The weighted R-factor wR and 
 goodness of fit S are based on F^2^, conventional R-factors R are based 
 on F, with F set to zero for negative F^2^. The threshold expression of 
 F^2^ > 2sigma(F^2^) is used only for calculating R-factors(gt) etc. and is 
 not relevant to the choice of reflections for refinement.  R-factors based 
 on F^2^ are statistically about twice as large as those based on F, and R- 
 factors based on ALL data will be even larger. 
; 
 
_refine_ls_structure_factor_coef  Fsqd  
_refine_ls_matrix_type            full 
_refine_ls_weighting_scheme       calc  
_refine_ls_weighting_details 
 'calc w=1/[\s^2^(Fo^2^)+(0.0300P)^2^+0.0000P] where P=(Fo^2^+2Fc^2^)/3' 
_atom_sites_solution_primary      direct 
_atom_sites_solution_secondary    difmap 
_atom_sites_solution_hydrogens    geom 
_refine_ls_hydrogen_treatment     constr 
_refine_ls_extinction_method      none 
_refine_ls_extinction_coef        ? 
_refine_ls_abs_structure_details 
 'Flack H D (1983), Acta Cryst. A39, 876-881' 
_refine_ls_abs_structure_Flack    0.012(11) 
_refine_ls_number_reflns          6156 
_refine_ls_number_parameters      307 
_refine_ls_number_restraints      0 
_refine_ls_R_factor_all           0.0462 
_refine_ls_R_factor_gt            0.0336 
_refine_ls_wR_factor_ref          0.0752 
_refine_ls_wR_factor_gt           0.0686 
_refine_ls_goodness_of_fit_ref    0.986 
_refine_ls_restrained_S_all       0.986 
_refine_ls_shift/su_max           0.000 
_refine_ls_shift/su_mean          0.000 
 
loop_ 
 _atom_site_label 
 _atom_site_type_symbol 
 _atom_site_fract_x 
 _atom_site_fract_y 
 _atom_site_fract_z 
 _atom_site_U_iso_or_equiv 
 _atom_site_adp_type 
 _atom_site_occupancy 
 _atom_site_symmetry_multiplicity 
 _atom_site_calc_flag 
 _atom_site_refinement_flags 
 _atom_site_disorder_assembly 
 _atom_site_disorder_group 
Fe1 Fe -0.30689(6) -0.49411(6) -0.21082(3) 0.03331(18) Uani 1 1 d . . . 
Fe2 Fe -0.33827(7) -0.59035(5) -0.09802(4) 0.03113(19) Uani 1 1 d . . . 
Fe3 Fe -0.36148(7) -0.40342(5) -0.09948(4) 0.0329(2) Uani 1 1 d . . . 
Fe4 Fe -0.52487(6) -0.51132(6) -0.15263(3) 0.0337(2) Uani 1 1 d . . . 
Se1 Se -0.41262(5) -0.63830(4) -0.19983(3) 0.03707(15) Uani 1 1 d . . . 
Se2 Se -0.17992(5) -0.48524(4) -0.12076(2) 0.03538(15) Uani 1 1 d . . . 
Se3 Se -0.44950(5) -0.36958(4) -0.20053(3) 0.03973(16) Uani 1 1 d . . . 
Cl1 Cl -0.19893(12) -0.48668(11) -0.29761(6) 0.0448(3) Uani 1 1 d . . . 
Cl2 Cl -0.28377(15) -0.71188(11) -0.04001(8) 0.0530(4) Uani 1 1 d . . . 
Cl3 Cl -0.32932(16) -0.27524(10) -0.04219(7) 0.0517(4) Uani 1 1 d . . . 
Cl4 Cl -0.71455(13) -0.53783(14) -0.16231(7) 0.0584(5) Uani 1 1 d . . . 
N1 N -0.4577(3) -0.5040(3) -0.06881(17) 0.0311(10) Uani 1 1 d . . . 
C1 C -0.5204(4) -0.5056(4) -0.0076(2) 0.0348(13) Uani 1 1 d . . . 
C2 C -0.4324(5) -0.4951(5) 0.0452(2) 0.0511(16) Uani 1 1 d . . . 
H2A H -0.3927 -0.4359 0.0410 0.077 Uiso 1 1 calc R . . 
H2B H -0.3773 -0.5458 0.0431 0.077 Uiso 1 1 calc R . . 
H2C H -0.4718 -0.4970 0.0847 0.077 Uiso 1 1 calc R . . 
C3 C -0.5839(5) -0.5984(4) -0.0013(3) 0.0452(16) Uani 1 1 d . . . 
H3A H -0.6392 -0.6046 -0.0345 0.068 Uiso 1 1 calc R . . 
H3B H -0.6235 -0.6003 0.0382 0.068 Uiso 1 1 calc R . . 
H3C H -0.5293 -0.6495 -0.0034 0.068 Uiso 1 1 calc R . . 
C4 C -0.6064(6) -0.4234(5) -0.0050(3) 0.0508(18) Uani 1 1 d . . . 
H4A H -0.6620 -0.4299 -0.0381 0.076 Uiso 1 1 calc R . . 
H4B H -0.5654 -0.3649 -0.0098 0.076 Uiso 1 1 calc R . . 
H4C H -0.6457 -0.4238 0.0345 0.076 Uiso 1 1 calc R . . 
N2 N -0.0076(4) -0.5102(3) 0.07846(17) 0.0342(11) Uani 1 1 d . . . 
C5 C 0.0960(5) -0.5520(5) 0.0456(3) 0.0444(16) Uani 1 1 d . . . 
H5A H 0.1219 -0.6067 0.0689 0.053 Uiso 1 1 calc R . . 
H5B H 0.1583 -0.5060 0.0462 0.053 Uiso 1 1 calc R . . 
C6 C 0.0748(5) -0.5814(6) -0.0214(3) 0.065(2) Uani 1 1 d . . . 
H6A H 0.1451 -0.6063 -0.0388 0.097 Uiso 1 1 calc R . . 
H6B H 0.0503 -0.5277 -0.0453 0.097 Uiso 1 1 calc R . . 
H6C H 0.0156 -0.6290 -0.0226 0.097 Uiso 1 1 calc R . . 
C7 C -0.0399(6) -0.4172(4) 0.0478(3) 0.0445(15) Uani 1 1 d . . . 
H7A H 0.0306 -0.3811 0.0414 0.053 Uiso 1 1 calc R . . 
H7B H -0.0722 -0.4306 0.0069 0.053 Uiso 1 1 calc R . . 
C8 C -0.1245(6) -0.3564(4) 0.0829(3) 0.0584(19) Uani 1 1 d . . . 
H8A H -0.1396 -0.3000 0.0594 0.088 Uiso 1 1 calc R . . 
H8B H -0.0925 -0.3399 0.1228 0.088 Uiso 1 1 calc R . . 
H8C H -0.1956 -0.3904 0.0889 0.088 Uiso 1 1 calc R . . 
C9 C -0.1114(5) -0.5741(4) 0.0760(3) 0.0396(15) Uani 1 1 d . . . 
H9A H -0.1348 -0.5809 0.0327 0.048 Uiso 1 1 calc R . . 
H9B H -0.1747 -0.5436 0.0981 0.048 Uiso 1 1 calc R . . 
C10 C -0.0948(6) -0.6716(4) 0.1034(3) 0.0528(18) Uani 1 1 d . . . 
H10A H -0.1655 -0.7068 0.0996 0.079 Uiso 1 1 calc R . . 
H10B H -0.0741 -0.6663 0.1467 0.079 Uiso 1 1 calc R . . 
H10C H -0.0341 -0.7037 0.0812 0.079 Uiso 1 1 calc R . . 
C11 C 0.0247(4) -0.4940(4) 0.1471(2) 0.0338(12) Uani 1 1 d . . . 
H11A H -0.0442 -0.4739 0.1694 0.041 Uiso 1 1 calc R . . 
H11B H 0.0492 -0.5537 0.1649 0.041 Uiso 1 1 calc R . . 
C12 C 0.1183(5) -0.4227(4) 0.1580(3) 0.0481(16) Uani 1 1 d . . . 
H12A H 0.1326 -0.4171 0.2021 0.072 Uiso 1 1 calc R . . 
H12B H 0.0945 -0.3627 0.1417 0.072 Uiso 1 1 calc R . . 
H12C H 0.1880 -0.4426 0.1374 0.072 Uiso 1 1 calc R . . 
N3 N 0.0531(4) -0.2736(3) -0.2363(2) 0.0430(13) Uani 1 1 d . . . 
C13 C -0.0681(6) -0.2794(5) -0.2121(4) 0.077(2) Uani 1 1 d . . . 
H13A H -0.0708 -0.3266 -0.1793 0.092 Uiso 1 1 calc R . . 
H13B H -0.1184 -0.3005 -0.2456 0.092 Uiso 1 1 calc R . . 
C14 C -0.1154(8) -0.1870(6) -0.1863(5) 0.123(4) Uani 1 1 d . . . 
H14A H -0.1939 -0.1961 -0.1726 0.184 Uiso 1 1 calc R . . 
H14B H -0.1136 -0.1397 -0.2184 0.184 Uiso 1 1 calc R . . 
H14C H -0.0687 -0.1670 -0.1516 0.184 Uiso 1 1 calc R . . 
C15 C 0.0652(7) -0.2013(5) -0.2859(4) 0.069(2) Uani 1 1 d . . . 
H15A H 0.1455 -0.1989 -0.2993 0.083 Uiso 1 1 calc R . . 
H15B H 0.0454 -0.1400 -0.2687 0.083 Uiso 1 1 calc R . . 
C16 C -0.0114(8) -0.2207(7) -0.3424(4) 0.100(3) Uani 1 1 d . . . 
H16A H 0.0000 -0.1721 -0.3731 0.150 Uiso 1 1 calc R . . 
H16B H -0.0912 -0.2214 -0.3297 0.150 Uiso 1 1 calc R . . 
H16C H 0.0087 -0.2807 -0.3601 0.150 Uiso 1 1 calc R . . 
C17 C 0.1384(8) -0.2458(6) -0.1845(4) 0.081(3) Uani 1 1 d . . . 
H17A H 0.1254 -0.1803 -0.1736 0.098 Uiso 1 1 calc R . . 
H17B H 0.2167 -0.2511 -0.2006 0.098 Uiso 1 1 calc R . . 
C18 C 0.1286(9) -0.3056(6) -0.1256(4) 0.103(3) Uani 1 1 d . . . 
H18A H 0.1851 -0.2850 -0.0956 0.155 Uiso 1 1 calc R . . 
H18B H 0.1421 -0.3706 -0.1358 0.155 Uiso 1 1 calc R . . 
H18C H 0.0523 -0.2988 -0.1082 0.155 Uiso 1 1 calc R . . 
C19 C 0.0826(6) -0.3723(5) -0.2604(3) 0.0593(19) Uani 1 1 d . . . 
H19A H 0.0829 -0.4159 -0.2254 0.071 Uiso 1 1 calc R . . 
H19B H 0.0225 -0.3925 -0.2891 0.071 Uiso 1 1 calc R . . 
C20 C 0.1999(7) -0.3774(6) -0.2935(4) 0.098(3) Uani 1 1 d . . . 
H20A H 0.2137 -0.4409 -0.3072 0.148 Uiso 1 1 calc R . . 
H20B H 0.2600 -0.3585 -0.2651 0.148 Uiso 1 1 calc R . . 
H20C H 0.1994 -0.3359 -0.3290 0.148 Uiso 1 1 calc R . . 
 
loop_ 
 _atom_site_aniso_label 
 _atom_site_aniso_U_11 
 _atom_site_aniso_U_22 
 _atom_site_aniso_U_33 
 _atom_site_aniso_U_23 
 _atom_site_aniso_U_13 
 _atom_site_aniso_U_12 
Fe1 0.0342(4) 0.0353(4) 0.0304(4) 0.0011(4) 0.0012(3) -0.0009(4) 
Fe2 0.0308(4) 0.0284(4) 0.0343(5) 0.0019(3) -0.0021(4) 0.0006(4) 
Fe3 0.0377(5) 0.0302(4) 0.0306(5) 0.0019(4) -0.0027(4) 0.0017(4) 
Fe4 0.0301(4) 0.0410(5) 0.0299(4) 0.0012(4) -0.0031(3) 0.0020(4) 
Se1 0.0388(3) 0.0351(3) 0.0373(3) -0.0042(3) -0.0005(3) -0.0039(3) 
Se2 0.0295(3) 0.0388(3) 0.0379(3) 0.0020(3) -0.0025(2) -0.0036(3) 
Se3 0.0498(4) 0.0371(3) 0.0323(3) 0.0059(3) -0.0024(3) 0.0080(3) 
Cl1 0.0429(8) 0.0569(10) 0.0347(7) 0.0016(8) 0.0062(6) -0.0029(7) 
Cl2 0.0598(10) 0.0379(9) 0.0612(11) 0.0117(7) -0.0190(9) 0.0031(8) 
Cl3 0.0714(11) 0.0327(8) 0.0509(10) -0.0052(7) -0.0133(9) 0.0025(8) 
Cl4 0.0328(8) 0.0942(14) 0.0482(10) 0.0006(9) -0.0070(7) -0.0028(8) 
N1 0.028(2) 0.040(3) 0.025(2) 0.004(2) -0.0006(18) 0.002(2) 
C1 0.031(3) 0.043(3) 0.031(3) 0.002(3) 0.006(2) -0.007(3) 
C2 0.050(4) 0.071(5) 0.032(3) -0.001(4) -0.001(3) -0.001(4) 
C3 0.042(4) 0.053(4) 0.041(4) 0.004(3) 0.004(3) -0.005(3) 
C4 0.047(4) 0.065(5) 0.040(4) -0.003(3) 0.005(3) 0.014(3) 
N2 0.030(2) 0.043(3) 0.030(2) 0.002(2) -0.0005(19) 0.001(2) 
C5 0.029(3) 0.067(4) 0.037(3) 0.002(3) 0.003(3) 0.004(3) 
C6 0.043(4) 0.113(7) 0.038(4) -0.013(4) 0.006(3) 0.013(4) 
C7 0.050(4) 0.041(4) 0.042(4) 0.013(3) -0.008(3) -0.002(3) 
C8 0.059(4) 0.039(4) 0.077(5) 0.009(4) -0.023(4) 0.006(3) 
C9 0.037(3) 0.046(4) 0.036(3) -0.005(3) -0.001(3) -0.008(3) 
C10 0.063(4) 0.035(4) 0.061(4) 0.005(3) 0.000(4) -0.010(3) 
C11 0.035(3) 0.037(3) 0.029(3) 0.002(3) -0.004(2) 0.002(3) 
C12 0.045(4) 0.061(4) 0.039(4) -0.004(3) -0.010(3) -0.006(3) 
N3 0.048(3) 0.032(3) 0.048(3) -0.003(2) 0.014(3) -0.012(2) 
C13 0.069(5) 0.067(5) 0.094(7) -0.009(5) 0.038(5) -0.002(4) 
C14 0.111(8) 0.095(7) 0.163(10) -0.019(7) 0.084(8) 0.027(6) 
C15 0.074(5) 0.060(5) 0.073(5) 0.018(4) 0.006(4) -0.004(4) 
C16 0.092(7) 0.124(8) 0.084(6) 0.044(6) -0.024(5) -0.009(6) 
C17 0.106(7) 0.073(5) 0.066(5) -0.011(4) -0.020(5) -0.027(5) 
C18 0.158(9) 0.096(7) 0.056(5) 0.002(5) -0.031(6) -0.029(7) 
C19 0.071(5) 0.049(4) 0.058(4) -0.011(3) 0.000(4) 0.002(4) 
C20 0.078(6) 0.119(8) 0.098(7) 0.003(6) 0.031(5) 0.043(6) 
 
_geom_special_details 
; 
 All esds (except the esd in the dihedral angle between two l.s. planes) 
 are estimated using the full covariance matrix.  The cell esds are taken 
 into account individually in the estimation of esds in distances, angles 
 and torsion angles; correlations between esds in cell parameters are only 
 used when they are defined by crystal symmetry.  An approximate (isotropic) 
 treatment of cell esds is used for estimating esds involving l.s. planes. 
; 
 
loop_ 
 _geom_bond_atom_site_label_1 
 _geom_bond_atom_site_label_2 
 _geom_bond_distance 
 _geom_bond_site_symmetry_2 
 _geom_bond_publ_flag 
Fe1 Cl1 2.2386(15) . ? 
Fe1 Se1 2.3913(10) . ? 
Fe1 Se3 2.4229(10) . ? 
Fe1 Se2 2.4240(9) . ? 
Fe1 Fe3 2.7790(11) . ? 
Fe1 Fe2 2.7956(11) . ? 
Fe1 Fe4 2.8171(11) . ? 
Fe1 N1 3.504(4) . ? 
Fe2 N1 1.946(4) . ? 
Fe2 Cl2 2.2140(17) . ? 
Fe2 Se2 2.4069(10) . ? 
Fe2 Se1 2.4377(10) . ? 
Fe2 Fe3 2.6625(11) . ? 
Fe2 Fe4 2.6935(11) . ? 
Fe2 Se3 4.0304(10) . ? 
Fe3 N1 1.922(4) . ? 
Fe3 Cl3 2.2226(17) . ? 
Fe3 Se3 2.4362(10) . ? 
Fe3 Se2 2.4371(10) . ? 
Fe3 Fe4 2.6805(11) . ? 
Fe3 Se1 4.0044(10) . ? 
Fe4 N1 1.956(4) . ? 
Fe4 Cl4 2.2302(17) . ? 
Fe4 Se3 2.4168(10) . ? 
Fe4 Se1 2.4362(10) . ? 
Fe4 Se2 4.0551(10) . ? 
Se1 N1 3.428(4) . ? 
Se1 Se3 3.8317(9) . ? 
Se1 Se2 3.8440(8) . ? 
Se1 Cl4 3.8481(18) . ? 
Se1 Cl2 3.8717(17) . ? 
Se1 Cl1 3.8825(15) . ? 
Se1 Se3 4.2210(8) 3_444 ? 
Se1 N3 4.769(5) 3_544 ? 
Se2 N1 3.403(4) . ? 
Se2 C13 3.741(8) . ? 
Se2 Cl1 3.7903(15) . ? 
Se2 Cl3 3.8279(17) . ? 
Se2 Cl2 3.8386(17) . ? 
Se2 Se3 3.9083(8) . ? 
Se2 N2 4.716(4) . ? 
Se3 N1 3.403(4) . ? 
Se3 Cl3 3.8971(17) . ? 
Se3 Cl1 3.9278(16) . ? 
Se3 Cl4 3.9630(18) . ? 
Se3 Se1 4.2209(8) 3_454 ? 
Se3 N2 5.050(4) 2_444 ? 
Cl2 N1 3.618(5) . ? 
Cl3 N1 3.609(5) . ? 
Cl4 N1 3.608(4) . ? 
N1 C1 1.496(6) . ? 
N1 C3 2.450(7) . ? 
N1 C2 2.460(6) . ? 
N1 C4 2.472(7) . ? 
C1 C3 1.512(8) . ? 
C1 C2 1.527(7) . ? 
C1 C4 1.531(8) . ? 
N2 C5 1.508(7) . ? 
N2 C9 1.502(7) . ? 
N2 C7 1.519(7) . ? 
N2 C11 1.532(6) . ? 
N2 C10 2.555(7) . ? 
N2 C6 2.547(7) . ? 
N2 C12 2.559(7) . ? 
N2 C8 2.565(8) . ? 
N2 Se3 5.050(4) 2_445 ? 
N2 Se1 5.270(4) 2_445 ? 
C5 C6 1.512(8) . ? 
C7 C8 1.503(9) . ? 
C9 C10 1.513(8) . ? 
C11 C12 1.497(7) . ? 
N3 C15 1.481(8) . ? 
N3 C13 1.494(8) . ? 
N3 C19 1.529(8) . ? 
N3 C17 1.534(8) . ? 
N3 C16 2.503(9) . ? 
N3 C14 2.537(9) . ? 
N3 C20 2.555(9) . ? 
N3 C18 2.564(9) . ? 
N3 Se1 4.769(5) 3_554 ? 
N3 Se2 5.309(5) 3_554 ? 
C13 C14 1.521(10) . ? 
C15 C16 1.522(10) . ? 
C17 C18 1.523(10) . ? 
C19 C20 1.529(9) . ? 
 
loop_ 
 _geom_angle_atom_site_label_1 
 _geom_angle_atom_site_label_2 
 _geom_angle_atom_site_label_3 
 _geom_angle 
 _geom_angle_site_symmetry_1 
 _geom_angle_site_symmetry_3 
 _geom_angle_publ_flag 
Cl1 Fe1 Se1 113.94(5) . . ? 
Cl1 Fe1 Se3 114.78(5) . . ? 
Se1 Fe1 Se3 105.48(3) . . ? 
Cl1 Fe1 Se2 108.70(5) . . ? 
Se1 Fe1 Se2 105.93(3) . . ? 
Se3 Fe1 Se2 107.48(3) . . ? 
Cl1 Fe1 Fe3 144.63(6) . . ? 
Se1 Fe1 Fe3 101.26(3) . . ? 
Se3 Fe1 Fe3 55.34(3) . . ? 
Se2 Fe1 Fe3 55.36(3) . . ? 
Cl1 Fe1 Fe2 144.21(5) . . ? 
Se1 Fe1 Fe2 55.40(3) . . ? 
Se3 Fe1 Fe2 100.89(3) . . ? 
Se2 Fe1 Fe2 54.36(3) . . ? 
Fe3 Fe1 Fe2 57.06(3) . . ? 
Cl1 Fe1 Fe4 150.18(5) . . ? 
Se1 Fe1 Fe4 55.05(3) . . ? 
Se3 Fe1 Fe4 54.30(3) . . ? 
Se2 Fe1 Fe4 101.11(3) . . ? 
Fe3 Fe1 Fe4 57.24(3) . . ? 
Fe2 Fe1 Fe4 57.36(3) . . ? 
Cl1 Fe1 N1 175.92(8) . . ? 
Se1 Fe1 N1 68.12(8) . . ? 
Se3 Fe1 N1 67.23(7) . . ? 
Se2 Fe1 N1 67.22(7) . . ? 
Fe3 Fe1 N1 33.14(8) . . ? 
Fe2 Fe1 N1 33.66(7) . . ? 
Fe4 Fe1 N1 33.90(7) . . ? 
N1 Fe2 Cl2 120.68(13) . . ? 
N1 Fe2 Se2 102.31(13) . . ? 
Cl2 Fe2 Se2 112.28(6) . . ? 
N1 Fe2 Se1 102.30(12) . . ? 
Cl2 Fe2 Se1 112.59(6) . . ? 
Se2 Fe2 Se1 105.02(4) . . ? 
N1 Fe2 Fe3 46.12(13) . . ? 
Cl2 Fe2 Fe3 144.00(6) . . ? 
Se2 Fe2 Fe3 57.20(3) . . ? 
Se1 Fe2 Fe3 103.38(4) . . ? 
N1 Fe2 Fe4 46.51(11) . . ? 
Cl2 Fe2 Fe4 142.52(6) . . ? 
Se2 Fe2 Fe4 105.18(4) . . ? 
Se1 Fe2 Fe4 56.43(3) . . ? 
Fe3 Fe2 Fe4 60.06(3) . . ? 
N1 Fe2 Fe1 93.56(12) . . ? 
Cl2 Fe2 Fe1 145.75(6) . . ? 
Se2 Fe2 Fe1 54.93(3) . . ? 
Se1 Fe2 Fe1 53.85(3) . . ? 
Fe3 Fe2 Fe1 61.16(3) . . ? 
Fe4 Fe2 Fe1 61.72(3) . . ? 
N1 Fe2 Se3 57.39(12) . . ? 
Cl2 Fe2 Se3 177.81(6) . . ? 
Se2 Fe2 Se3 69.60(2) . . ? 
Se1 Fe2 Se3 67.55(2) . . ? 
Fe3 Fe2 Se3 35.84(2) . . ? 
Fe4 Fe2 Se3 35.58(2) . . ? 
Fe1 Fe2 Se3 36.18(2) . . ? 
N1 Fe3 Cl3 120.93(13) . . ? 
N1 Fe3 Se3 102.01(11) . . ? 
Cl3 Fe3 Se3 113.46(5) . . ? 
N1 Fe3 Se2 101.98(13) . . ? 
Cl3 Fe3 Se2 110.38(6) . . ? 
Se3 Fe3 Se2 106.63(4) . . ? 
N1 Fe3 Fe2 46.88(13) . . ? 
Cl3 Fe3 Fe2 142.16(6) . . ? 
Se3 Fe3 Fe2 104.37(4) . . ? 
Se2 Fe3 Fe2 56.12(3) . . ? 
N1 Fe3 Fe4 46.82(11) . . ? 
Cl3 Fe3 Fe4 144.84(6) . . ? 
Se3 Fe3 Fe4 56.13(3) . . ? 
Se2 Fe3 Fe4 104.71(4) . . ? 
Fe2 Fe3 Fe4 60.54(3) . . ? 
N1 Fe3 Fe1 94.63(12) . . ? 
Cl3 Fe3 Fe1 144.38(6) . . ? 
Se3 Fe3 Fe1 54.89(3) . . ? 
Se2 Fe3 Fe1 54.91(3) . . ? 
Fe2 Fe3 Fe1 61.78(3) . . ? 
Fe4 Fe3 Fe1 62.10(3) . . ? 
N1 Fe3 Se1 58.78(12) . . ? 
Cl3 Fe3 Se1 178.36(5) . . ? 
Se3 Fe3 Se1 68.06(2) . . ? 
Se2 Fe3 Se1 68.36(2) . . ? 
Fe2 Fe3 Se1 36.32(2) . . ? 
Fe4 Fe3 Se1 36.37(2) . . ? 
Fe1 Fe3 Se1 35.85(2) . . ? 
N1 Fe4 Cl4 118.88(12) . . ? 
N1 Fe4 Se3 101.65(14) . . ? 
Cl4 Fe4 Se3 116.98(6) . . ? 
N1 Fe4 Se1 102.04(13) . . ? 
Cl4 Fe4 Se1 111.03(6) . . ? 
Se3 Fe4 Se1 104.28(3) . . ? 
N1 Fe4 Fe3 45.74(13) . . ? 
Cl4 Fe4 Fe3 145.66(6) . . ? 
Se3 Fe4 Fe3 56.82(3) . . ? 
Se1 Fe4 Fe3 102.90(3) . . ? 
N1 Fe4 Fe2 46.20(12) . . ? 
Cl4 Fe4 Fe2 139.00(6) . . ? 
Se3 Fe4 Fe2 103.99(3) . . ? 
Se1 Fe4 Fe2 56.48(3) . . ? 
Fe3 Fe4 Fe2 59.40(3) . . ? 
N1 Fe4 Fe1 92.68(12) . . ? 
Cl4 Fe4 Fe1 148.17(5) . . ? 
Se3 Fe4 Fe1 54.50(3) . . ? 
Se1 Fe4 Fe1 53.56(3) . . ? 
Fe3 Fe4 Fe1 60.67(3) . . ? 
Fe2 Fe4 Fe1 60.92(3) . . ? 
N1 Fe4 Se2 56.78(11) . . ? 
Cl4 Fe4 Se2 173.82(6) . . ? 
Se3 Fe4 Se2 69.04(2) . . ? 
Se1 Fe4 Se2 67.37(2) . . ? 
Fe3 Fe4 Se2 35.54(2) . . ? 
Fe2 Fe4 Se2 34.95(2) . . ? 
Fe1 Fe4 Se2 35.913(18) . . ? 
Fe1 Se1 Fe2 70.74(3) . . ? 
Fe1 Se1 Fe4 71.39(3) . . ? 
Fe2 Se1 Fe4 67.10(3) . . ? 
Fe1 Se1 N1 71.54(7) . . ? 
Fe2 Se1 N1 33.69(7) . . ? 
Fe4 Se1 N1 33.93(7) . . ? 
Fe1 Se1 Se3 37.55(2) . . ? 
Fe2 Se1 Se3 76.44(3) . . ? 
Fe4 Se1 Se3 37.68(2) . . ? 
N1 Se1 Se3 55.56(7) . . ? 
Fe1 Se1 Se2 37.33(2) . . ? 
Fe2 Se1 Se2 37.21(2) . . ? 
Fe4 Se1 Se2 76.83(3) . . ? 
N1 Se1 Se2 55.44(7) . . ? 
Se3 Se1 Se2 61.218(16) . . ? 
Fe1 Se1 Cl4 99.57(4) . . ? 
Fe2 Se1 Cl4 91.67(3) . . ? 
Fe4 Se1 Cl4 32.75(3) . . ? 
N1 Se1 Cl4 59.11(7) . . ? 
Se3 Se1 Cl4 62.13(3) . . ? 
Se2 Se1 Cl4 109.38(3) . . ? 
Fe1 Se1 Cl2 96.95(3) . . ? 
Fe2 Se1 Cl2 31.87(3) . . ? 
Fe4 Se1 Cl2 92.12(3) . . ? 
N1 Se1 Cl2 59.04(7) . . ? 
Se3 Se1 Cl2 108.28(3) . . ? 
Se2 Se1 Cl2 59.67(3) . . ? 
Cl4 Se1 Cl2 105.25(4) . . ? 
Fe1 Se1 Cl1 31.80(3) . . ? 
Fe2 Se1 Cl1 95.95(3) . . ? 
Fe4 Se1 Cl1 98.76(3) . . ? 
N1 Se1 Cl1 103.28(8) . . ? 
Se3 Se1 Cl1 61.21(3) . . ? 
Se2 Se1 Cl1 58.75(2) . . ? 
Cl4 Se1 Cl1 118.86(4) . . ? 
Cl2 Se1 Cl1 112.40(4) . . ? 
Fe1 Se1 Fe3 42.89(2) . . ? 
Fe2 Se1 Fe3 40.30(2) . . ? 
Fe4 Se1 Fe3 40.73(2) . . ? 
N1 Se1 Fe3 28.65(7) . . ? 
Se3 Se1 Fe3 36.142(16) . . ? 
Se2 Se1 Fe3 36.109(15) . . ? 
Cl4 Se1 Fe3 73.39(3) . . ? 
Cl2 Se1 Fe3 72.17(3) . . ? 
Cl1 Se1 Fe3 74.65(3) . . ? 
Fe1 Se1 Se3 143.71(3) . 3_444 ? 
Fe2 Se1 Se3 143.17(3) . 3_444 ? 
Fe4 Se1 Se3 125.62(3) . 3_444 ? 
N1 Se1 Se3 141.90(7) . 3_444 ? 
Se3 Se1 Se3 136.703(17) . 3_444 ? 
Se2 Se1 Se3 157.47(2) . 3_444 ? 
Cl4 Se1 Se3 92.95(3) . 3_444 ? 
Cl2 Se1 Se3 112.44(3) . 3_444 ? 
Cl1 Se1 Se3 113.38(3) . 3_444 ? 
Fe3 Se1 Se3 166.33(2) . 3_444 ? 
Fe1 Se1 N3 82.62(6) . 3_544 ? 
Fe2 Se1 N3 93.54(7) . 3_544 ? 
Fe4 Se1 N3 151.40(7) . 3_544 ? 
N1 Se1 N3 126.10(9) . 3_544 ? 
Se3 Se1 N3 119.66(6) . 3_544 ? 
Se2 Se1 N3 75.24(6) . 3_544 ? 
Cl4 Se1 N3 174.77(7) . 3_544 ? 
Cl2 Se1 N3 79.09(7) . 3_544 ? 
Cl1 Se1 N3 61.04(6) . 3_544 ? 
Fe3 Se1 N3 111.06(6) . 3_544 ? 
Se3 Se1 N3 82.59(6) 3_444 3_544 ? 
Fe2 Se2 Fe1 70.72(3) . . ? 
Fe2 Se2 Fe3 66.68(3) . . ? 
Fe1 Se2 Fe3 69.73(3) . . ? 
Fe2 Se2 N1 33.97(8) . . ? 
Fe1 Se2 N1 71.72(7) . . ? 
Fe3 Se2 N1 33.54(8) . . ? 
Fe2 Se2 C13 148.21(13) . . ? 
Fe1 Se2 C13 80.43(14) . . ? 
Fe3 Se2 C13 91.32(11) . . ? 
N1 Se2 C13 123.80(13) . . ? 
Fe2 Se2 Cl1 98.89(3) . . ? 
Fe1 Se2 Cl1 34.02(3) . . ? 
Fe3 Se2 Cl1 98.01(3) . . ? 
N1 Se2 Cl1 105.73(7) . . ? 
C13 Se2 Cl1 60.18(14) . . ? 
Fe2 Se2 Cl3 92.89(4) . . ? 
Fe1 Se2 Cl3 96.73(4) . . ? 
Fe3 Se2 Cl3 32.97(3) . . ? 
N1 Se2 Cl3 59.54(8) . . ? 
C13 Se2 Cl3 77.20(11) . . ? 
Cl1 Se2 Cl3 114.62(4) . . ? 
Fe2 Se2 Cl2 32.26(3) . . ? 
Fe1 Se2 Cl2 97.22(3) . . ? 
Fe3 Se2 Cl2 92.62(4) . . ? 
N1 Se2 Cl2 59.58(8) . . ? 
C13 Se2 Cl2 174.41(12) . . ? 
Cl1 Se2 Cl2 115.26(4) . . ? 
Cl3 Se2 Cl2 108.19(4) . . ? 
Fe2 Se2 Se1 37.77(2) . . ? 
Fe1 Se2 Se1 36.74(2) . . ? 
Fe3 Se2 Se1 75.54(3) . . ? 
N1 Se2 Se1 56.07(7) . . ? 
C13 Se2 Se1 116.82(14) . . ? 
Cl1 Se2 Se1 61.13(3) . . ? 
Cl3 Se2 Se1 108.50(3) . . ? 
Cl2 Se2 Se1 60.52(3) . . ? 
Fe2 Se2 Se3 75.14(2) . . ? 
Fe1 Se2 Se3 36.25(2) . . ? 
Fe3 Se2 Se3 36.67(2) . . ? 
N1 Se2 Se3 54.95(7) . . ? 
C13 Se2 Se3 73.70(12) . . ? 
Cl1 Se2 Se3 61.33(3) . . ? 
Cl3 Se2 Se3 60.49(3) . . ? 
Cl2 Se2 Se3 107.39(3) . . ? 
Se1 Se2 Se3 59.236(16) . . ? 
Fe2 Se2 Fe4 39.87(2) . . ? 
Fe1 Se2 Fe4 42.97(2) . . ? 
Fe3 Se2 Fe4 39.74(2) . . ? 
N1 Se2 Fe4 28.75(6) . . ? 
C13 Se2 Fe4 108.77(13) . . ? 
Cl1 Se2 Fe4 76.99(3) . . ? 
Cl3 Se2 Fe4 72.70(3) . . ? 
Cl2 Se2 Fe4 72.12(3) . . ? 
Se1 Se2 Fe4 35.802(16) . . ? 
Se3 Se2 Fe4 35.273(16) . . ? 
Fe2 Se2 N2 95.21(6) . . ? 
Fe1 Se2 N2 165.77(6) . . ? 
Fe3 Se2 N2 103.25(6) . . ? 
N1 Se2 N2 95.50(8) . . ? 
C13 Se2 N2 112.65(15) . . ? 
Cl1 Se2 N2 157.85(6) . . ? 
Cl3 Se2 N2 81.45(6) . . ? 
Cl2 Se2 N2 70.25(6) . . ? 
Se1 Se2 N2 130.53(6) . . ? 
Se3 Se2 N2 139.60(5) . . ? 
Fe4 Se2 N2 123.97(5) . . ? 
Fe4 Se3 Fe1 71.19(3) . . ? 
Fe4 Se3 Fe3 67.05(3) . . ? 
Fe1 Se3 Fe3 69.77(3) . . ? 
Fe4 Se3 N1 34.27(7) . . ? 
Fe1 Se3 N1 71.73(7) . . ? 
Fe3 Se3 N1 33.53(7) . . ? 
Fe4 Se3 Se1 38.04(2) . . ? 
Fe1 Se3 Se1 36.97(2) . . ? 
Fe3 Se3 Se1 75.80(3) . . ? 
N1 Se3 Se1 56.19(7) . . ? 
Fe4 Se3 Cl3 92.55(3) . . ? 
Fe1 Se3 Cl3 95.00(3) . . ? 
Fe3 Se3 Cl3 31.54(3) . . ? 
N1 Se3 Cl3 58.79(8) . . ? 
Se1 Se3 Cl3 107.34(3) . . ? 
Fe4 Se3 Se2 75.68(2) . . ? 
Fe1 Se3 Se2 36.27(2) . . ? 
Fe3 Se3 Se2 36.69(2) . . ? 
N1 Se3 Se2 54.95(7) . . ? 
Se1 Se3 Se2 59.546(15) . . ? 
Cl3 Se3 Se2 58.74(3) . . ? 
Fe4 Se3 Cl1 97.94(3) . . ? 
Fe1 Se3 Cl1 31.16(3) . . ? 
Fe3 Se3 Cl1 94.55(3) . . ? 
N1 Se3 Cl1 102.83(7) . . ? 
Se1 Se3 Cl1 60.03(3) . . ? 
Cl3 Se3 Cl1 110.04(4) . . ? 
Se2 Se3 Cl1 57.86(2) . . ? 
Fe4 Se3 Cl4 30.10(3) . . ? 
Fe1 Se3 Cl4 96.01(4) . . ? 
Fe3 Se3 Cl4 91.16(3) . . ? 
N1 Se3 Cl4 58.06(7) . . ? 
Se1 Se3 Cl4 59.14(3) . . ? 
Cl3 Se3 Cl4 107.55(4) . . ? 
Se2 Se3 Cl4 105.77(3) . . ? 
Cl1 Se3 Cl4 115.02(4) . . ? 
Fe4 Se3 Fe2 40.43(2) . . ? 
Fe1 Se3 Fe2 42.93(2) . . ? 
Fe3 Se3 Fe2 39.79(2) . . ? 
N1 Se3 Fe2 28.80(7) . . ? 
Se1 Se3 Fe2 36.013(16) . . ? 
Cl3 Se3 Fe2 71.33(3) . . ? 
Se2 Se3 Fe2 35.256(15) . . ? 
Cl1 Se3 Fe2 74.07(3) . . ? 
Cl4 Se3 Fe2 70.52(3) . . ? 
Fe4 Se3 Se1 136.37(3) . 3_454 ? 
Fe1 Se3 Se1 140.86(3) . 3_454 ? 
Fe3 Se3 Se1 139.30(3) . 3_454 ? 
N1 Se3 Se1 147.40(7) . 3_454 ? 
Se1 Se3 Se1 144.633(19) . 3_454 ? 
Cl3 Se3 Se1 107.87(3) . 3_454 ? 
Se2 Se3 Se1 147.79(2) . 3_454 ? 
Cl1 Se3 Se1 109.78(3) . 3_454 ? 
Cl4 Se3 Se1 106.29(3) . 3_454 ? 
Fe2 Se3 Se1 175.97(2) . 3_454 ? 
Fe4 Se3 N2 94.68(6) . 2_444 ? 
Fe1 Se3 N2 74.68(5) . 2_444 ? 
Fe3 Se3 N2 143.64(6) . 2_444 ? 
N1 Se3 N2 125.73(9) . 2_444 ? 
Se1 Se3 N2 71.30(6) . 2_444 ? 
Cl3 Se3 N2 164.68(6) . 2_444 ? 
Se2 Se3 N2 110.20(5) . 2_444 ? 
Cl1 Se3 N2 55.56(5) . 2_444 ? 
Cl4 Se3 N2 85.11(6) . 2_444 ? 
Fe2 Se3 N2 106.19(6) . 2_444 ? 
Se1 Se3 N2 75.65(6) 3_454 2_444 ? 
Fe1 Cl1 Se2 37.28(3) . . ? 
Fe1 Cl1 Se1 34.26(3) . . ? 
Se2 Cl1 Se1 60.12(2) . . ? 
Fe1 Cl1 Se3 34.06(3) . . ? 
Se2 Cl1 Se3 60.81(2) . . ? 
Se1 Cl1 Se3 58.76(2) . . ? 
Fe2 Cl2 N1 27.56(7) . . ? 
Fe2 Cl2 Se2 35.47(3) . . ? 
N1 Cl2 Se2 54.21(7) . . ? 
Fe2 Cl2 Se1 35.54(3) . . ? 
N1 Cl2 Se1 54.35(6) . . ? 
Se2 Cl2 Se1 59.81(3) . . ? 
Fe3 Cl3 N1 27.18(7) . . ? 
Fe3 Cl3 Se2 36.64(4) . . ? 
N1 Cl3 Se2 54.36(7) . . ? 
Fe3 Cl3 Se3 34.99(3) . . ? 
N1 Cl3 Se3 53.75(6) . . ? 
Se2 Cl3 Se3 60.78(3) . . ? 
Fe4 Cl4 N1 28.35(6) . . ? 
Fe4 Cl4 Se1 36.22(4) . . ? 
N1 Cl4 Se1 54.63(7) . . ? 
Fe4 Cl4 Se3 32.92(4) . . ? 
N1 Cl4 Se3 53.16(7) . . ? 
Se1 Cl4 Se3 58.73(3) . . ? 
C1 N1 Fe3 126.1(4) . . ? 
C1 N1 Fe2 127.9(3) . . ? 
Fe3 N1 Fe2 87.00(16) . . ? 
C1 N1 Fe4 127.6(3) . . ? 
Fe3 N1 Fe4 87.44(16) . . ? 
Fe2 N1 Fe4 87.29(16) . . ? 
C1 N1 C3 35.7(3) . . ? 
Fe3 N1 C3 161.8(3) . . ? 
Fe2 N1 C3 105.5(2) . . ? 
Fe4 N1 C3 106.0(2) . . ? 
C1 N1 C2 36.0(2) . . ? 
Fe3 N1 C2 103.4(2) . . ? 
Fe2 N1 C2 105.5(2) . . ? 
Fe4 N1 C2 163.5(2) . . ? 
C3 N1 C2 60.9(2) . . ? 
C1 N1 C4 35.7(3) . . ? 
Fe3 N1 C4 104.3(2) . . ? 
Fe2 N1 C4 163.6(3) . . ? 
Fe4 N1 C4 104.8(2) . . ? 
C3 N1 C4 60.9(2) . . ? 
C2 N1 C4 60.7(2) . . ? 
C1 N1 Se2 138.0(3) . . ? 
Fe3 N1 Se2 44.48(9) . . ? 
Fe2 N1 Se2 43.72(9) . . ? 
Fe4 N1 Se2 94.47(13) . . ? 
C3 N1 Se2 142.7(2) . . ? 
C2 N1 Se2 102.02(18) . . ? 
C4 N1 Se2 143.0(2) . . ? 
C1 N1 Se3 138.3(3) . . ? 
Fe3 N1 Se3 44.45(8) . . ? 
Fe2 N1 Se3 93.80(13) . . ? 
Fe4 N1 Se3 44.08(9) . . ? 
C3 N1 Se3 144.2(2) . . ? 
C2 N1 Se3 142.1(3) . . ? 
C4 N1 Se3 102.6(2) . . ? 
Se2 N1 Se3 70.10(8) . . ? 
C1 N1 Se1 141.3(3) . . ? 
Fe3 N1 Se1 92.57(13) . . ? 
Fe2 N1 Se1 44.01(8) . . ? 
Fe4 N1 Se1 44.03(9) . . ? 
C3 N1 Se1 105.6(2) . . ? 
C2 N1 Se1 145.2(2) . . ? 
C4 N1 Se1 144.4(2) . . ? 
Se2 N1 Se1 68.49(7) . . ? 
Se3 N1 Se1 68.24(7) . . ? 
C1 N1 Fe1 178.3(3) . . ? 
Fe3 N1 Fe1 52.23(9) . . ? 
Fe2 N1 Fe1 52.77(9) . . ? 
Fe4 N1 Fe1 53.42(9) . . ? 
C3 N1 Fe1 145.9(2) . . ? 
C2 N1 Fe1 143.0(2) . . ? 
C4 N1 Fe1 143.6(2) . . ? 
Se2 N1 Fe1 41.06(5) . . ? 
Se3 N1 Fe1 41.04(5) . . ? 
Se1 N1 Fe1 40.34(5) . . ? 
C1 N1 Cl2 96.2(3) . . ? 
Fe3 N1 Cl2 109.97(15) . . ? 
Fe2 N1 Cl2 31.76(8) . . ? 
Fe4 N1 Cl2 109.43(17) . . ? 
C3 N1 Cl2 77.54(18) . . ? 
C2 N1 Cl2 78.9(2) . . ? 
C4 N1 Cl2 131.9(2) . . ? 
Se2 N1 Cl2 66.21(8) . . ? 
Se3 N1 Cl2 125.56(11) . . ? 
Se1 N1 Cl2 66.60(8) . . ? 
Fe1 N1 Cl2 84.53(9) . . ? 
N1 C1 C3 109.0(5) . . ? 
N1 C1 C2 108.9(4) . . ? 
C3 C1 C2 109.9(5) . . ? 
N1 C1 C4 109.5(4) . . ? 
C3 C1 C4 110.2(5) . . ? 
C2 C1 C4 109.3(5) . . ? 
C1 C2 N1 35.1(2) . . ? 
C1 C3 N1 35.3(2) . . ? 
C1 C4 N1 34.8(2) . . ? 
C5 N2 C9 112.3(4) . . ? 
C5 N2 C7 109.5(4) . . ? 
C9 N2 C7 108.2(4) . . ? 
C5 N2 C11 108.2(4) . . ? 
C9 N2 C11 108.6(4) . . ? 
C7 N2 C11 110.1(4) . . ? 
C5 N2 C10 93.3(4) . . ? 
C9 N2 C10 32.2(3) . . ? 
C7 N2 C10 140.4(4) . . ? 
C11 N2 C10 91.7(3) . . ? 
C5 N2 C6 32.5(3) . . ? 
C9 N2 C6 91.7(3) . . ? 
C7 N2 C6 94.2(3) . . ? 
C11 N2 C6 140.5(3) . . ? 
C10 N2 C6 88.1(3) . . ? 
C5 N2 C12 92.9(3) . . ? 
C9 N2 C12 140.2(3) . . ? 
C7 N2 C12 90.3(3) . . ? 
C11 N2 C12 31.9(3) . . ? 
C10 N2 C12 121.2(3) . . ? 
C6 N2 C12 122.5(3) . . ? 
C5 N2 C8 140.1(4) . . ? 
C9 N2 C8 95.4(3) . . ? 
C7 N2 C8 31.7(3) . . ? 
C11 N2 C8 88.0(3) . . ? 
C10 N2 C8 123.1(3) . . ? 
C6 N2 C8 124.3(3) . . ? 
C12 N2 C8 82.1(2) . . ? 
C5 N2 Se2 86.7(3) . . ? 
C9 N2 Se2 71.2(3) . . ? 
C7 N2 Se2 56.0(3) . . ? 
C11 N2 Se2 163.2(3) . . ? 
C10 N2 Se2 95.16(18) . . ? 
C6 N2 Se2 55.19(16) . . ? 
C12 N2 Se2 143.5(2) . . ? 
C8 N2 Se2 75.40(18) . . ? 
C5 N2 Se3 112.5(3) . 2_445 ? 
C9 N2 Se3 75.6(3) . 2_445 ? 
C7 N2 Se3 132.3(3) . 2_445 ? 
C11 N2 Se3 34.7(2) . 2_445 ? 
C10 N2 Se3 57.60(16) . 2_445 ? 
C6 N2 Se3 133.5(2) . 2_445 ? 
C12 N2 Se3 66.18(16) . 2_445 ? 
C8 N2 Se3 101.57(19) . 2_445 ? 
Se2 N2 Se3 146.12(10) . 2_445 ? 
C5 N2 Se1 135.7(3) . 2_445 ? 
C9 N2 Se1 97.6(3) . 2_445 ? 
C7 N2 Se1 90.0(3) . 2_445 ? 
C11 N2 Se1 28.4(2) . 2_445 ? 
C10 N2 Se1 95.80(18) . 2_445 ? 
C6 N2 Se1 168.05(19) . 2_445 ? 
C12 N2 Se1 46.13(15) . 2_445 ? 
C8 N2 Se1 62.33(17) . 2_445 ? 
Se2 N2 Se1 135.23(9) . 2_445 ? 
Se3 N2 Se1 43.52(3) 2_445 2_445 ? 
N2 C5 C6 115.0(5) . . ? 
C5 C6 N2 32.5(3) . . ? 
C8 C7 N2 116.2(5) . . ? 
C7 C8 N2 32.1(3) . . ? 
N2 C9 C10 115.8(5) . . ? 
C9 C10 N2 32.0(3) . . ? 
C12 C11 N2 115.3(4) . . ? 
C11 C12 N2 32.8(2) . . ? 
C15 N3 C13 112.0(6) . . ? 
C15 N3 C19 111.8(5) . . ? 
C13 N3 C19 105.9(5) . . ? 
C15 N3 C17 106.3(5) . . ? 
C13 N3 C17 111.3(6) . . ? 
C19 N3 C17 109.6(5) . . ? 
C15 N3 C16 34.1(4) . . ? 
C13 N3 C16 93.0(5) . . ? 
C19 N3 C16 92.0(4) . . ? 
C17 N3 C16 140.3(4) . . ? 
C15 N3 C14 92.3(5) . . ? 
C13 N3 C14 33.1(4) . . ? 
C19 N3 C14 139.0(4) . . ? 
C17 N3 C14 93.6(5) . . ? 
C16 N3 C14 90.6(4) . . ? 
C15 N3 C20 89.6(4) . . ? 
C13 N3 C20 139.0(5) . . ? 
C19 N3 C20 33.4(4) . . ? 
C17 N3 C20 93.9(5) . . ? 
C16 N3 C20 86.3(3) . . ? 
C14 N3 C20 171.4(4) . . ? 
C15 N3 C18 138.8(5) . . ? 
C13 N3 C18 89.3(5) . . ? 
C19 N3 C18 94.2(4) . . ? 
C17 N3 C18 32.8(4) . . ? 
C16 N3 C18 172.5(4) . . ? 
C14 N3 C18 87.5(4) . . ? 
C20 N3 C18 96.6(4) . . ? 
C15 N3 Se2 150.1(4) . . ? 
C13 N3 Se2 41.5(4) . . ? 
C19 N3 Se2 73.8(3) . . ? 
C17 N3 Se2 98.6(4) . . ? 
C16 N3 Se2 119.7(2) . . ? 
C14 N3 Se2 69.5(2) . . ? 
C20 N3 Se2 105.2(2) . . ? 
C18 N3 Se2 66.3(2) . . ? 
C15 N3 Se1 55.6(3) . 3_554 ? 
C13 N3 Se1 159.3(4) . 3_554 ? 
C19 N3 Se1 94.5(3) . 3_554 ? 
C17 N3 Se1 63.0(4) . 3_554 ? 
C16 N3 Se1 83.0(2) . 3_554 ? 
C14 N3 Se1 126.4(3) . 3_554 ? 
C20 N3 Se1 61.2(2) . 3_554 ? 
C18 N3 Se1 92.3(3) . 3_554 ? 
Se2 N3 Se1 154.11(12) . 3_554 ? 
C15 N3 Se2 13.9(3) . 3_554 ? 
C13 N3 Se2 120.0(4) . 3_554 ? 
C19 N3 Se2 116.7(3) . 3_554 ? 
C17 N3 Se2 92.4(3) . 3_554 ? 
C16 N3 Se2 47.9(2) . 3_554 ? 
C14 N3 Se2 94.7(3) . 3_554 ? 
C20 N3 Se2 89.1(2) . 3_554 ? 
C18 N3 Se2 125.1(2) . 3_554 ? 
Se2 N3 Se2 161.17(12) . 3_554 ? 
Se1 N3 Se2 44.45(4) 3_554 3_554 ? 
N3 C13 C14 114.5(6) . . ? 
N3 C13 Se2 123.2(4) . . ? 
C14 C13 Se2 110.9(5) . . ? 
C13 C14 N3 32.4(3) . . ? 
N3 C15 C16 112.9(6) . . ? 
C15 C16 N3 33.0(3) . . ? 
N3 C17 C18 114.1(6) . . ? 
C17 C18 N3 33.1(3) . . ? 
C20 C19 N3 113.3(6) . . ? 
C19 C20 N3 33.3(3) . . ? 
 
_diffrn_measured_fraction_theta_max    0.998 
_diffrn_reflns_theta_full              25.00 
_diffrn_measured_fraction_theta_full   0.998 
_refine_diff_density_max    0.476 
_refine_diff_density_min   -0.328 
_refine_diff_density_rms    0.083 

 #===END

 #===END
